# Supplementary material for: P450-mediated dehydrotyrosine formation during WS9326 biosynthesis proceeds via dehydrogenation of a specific acylated dipeptide substrate
Source: PubMed Central journal article supplement — Acta Pharm Sin B. 2023 Mar 29;13(8):3561–74. doi: 10.1016/j.apsb.2023.03.021 (PMC10465960; doi:10.1016/j.apsb.2023.03.021), 2023-03-29
Supplement: mmc1.pdf [file mmc1.pdf]

## Supporting Information for

### Original article

#### **P450-mediated dehydrotyrosine formation during WS9326 biosynthesis proceeds via dehydrogenation of a specific acylated dipeptide substrate**

Songya Zhang<sup>a</sup>, Lin Zhang<sup>b</sup>, Anja Greule<sup>c</sup>, Julien Tailhades<sup>c,d,e</sup>, Edward Marschall<sup>c,d,e</sup>, Panward Prasongpholchai<sup>f</sup>, Daniel J. Leng<sup>f</sup>, Jingfan Zhang<sup>g</sup>, Jing Zhu<sup>a</sup>, Joe A. Kaczmarek<sup>h</sup>, Ralf B. Schittenhelm<sup>c,i</sup>, Oliver Einsle<sup>b</sup>, Colin J. Jackson<sup>e,h</sup>, Fabrizio Alberti<sup>f,g</sup>, Andreas Bechthold<sup>j</sup>, Youming Zhang<sup>a</sup>, Manuela Tosin<sup>f,\*</sup>, Tong Si<sup>a,\*</sup>, Max J Cryle<sup>c,d,e,\*</sup>

<sup>a</sup>*CAS Key Laboratory of Quantitative Engineering Biology, Shenzhen Institute of Synthetic Biology, Shenzhen Institute of Advanced Technology, Chinese Academy of Sciences, Shenzhen 518055, China*

<sup>b</sup>*Institut für Biochemie, Albert-Ludwigs-Universität Freiburg, Freiburg 79104, Germany*

<sup>c</sup>*Department of Biochemistry and Molecular Biology, The Monash Biomedicine Discovery Institute, Monash University, Clayton, VIC 3800, Australia*

<sup>d</sup>*EMBL Australia, Monash University, Clayton, VIC 3800, Australia*

<sup>e</sup>*ARC Centre of Excellence for Innovations in Peptide and Protein Science, Clayton, VIC 3800, Australia*

<sup>f</sup>*Department of Chemistry, University of Warwick, Gibbet Hill Road, Coventry, CV4 7AL, UK*

<sup>g</sup>*School of Life Sciences, University of Warwick, Gibbet Hill Campus, Coventry, CV4 7AL, UK*

<sup>h</sup>*Research School of Chemistry, the Australian National University, Acton, ACT 2601, Australia*

<sup>i</sup>*Monash Proteomics and Metabolomics Facility, Monash University, Clayton, VIC 3800, Australia*

<sup>j</sup>*Institute of Pharmaceutical Sciences, Albert-Ludwigs-Universität Freiburg 79104, Germany*

Received 6 February 2023; received in revised form 16 March 2023; accepted 16 March 2023

\*Corresponding authors.

E-mail addresses: [M.Tosin@warwick.ac.uk](mailto:M.Tosin@warwick.ac.uk) (Manuela Tosin), [tong.si@siat.ac.cn](mailto:tong.si@siat.ac.cn) (Tong Si); [max.cryle@monash.edu](mailto:max.cryle@monash.edu) (Max J Cryle).

**1. Tables ..... 2**  
**2. Figures ..... 17**  
**3. References ..... 60**

## 1. SI Tables

**Table S1. Plasmids used in this study.**

| Name                             | Description                                                                                                                                             | Reference  |
|----------------------------------|---------------------------------------------------------------------------------------------------------------------------------------------------------|------------|
| pIJ790                           | $\lambda$ -Red plasmid, temperature sensitive replicon                                                                                                  | [1]        |
| pBluescript II SK(+)             | Cloning vector, lacZ' ( $\alpha$ -complementation)                                                                                                      | Stratagene |
| pKC1132                          | Conjugative vector, non-replicative in <i>Streptomyces</i>                                                                                              | [2]        |
| pUZ8002                          | Helper plasmid for conjugating plasmid containing the oriT sequence, RK2-derived (IncP-1 $\alpha$ group), tra1 and tra2 region                          | [3]        |
| pBSK-Sas16                       | Plasmid containing gene <i>sas16</i> for subcloning                                                                                                     | This study |
| pKCLP2-gusA                      | pKCLP2 derivative with <i>gusA</i> gene                                                                                                                 | [4]        |
| pTESa                            | pSET152 derivatives; attP flanked by loxP site, ermEp1 promoter flanked by <i>tfd</i> terminator sequences                                              | [4]        |
| pLRECEJ                          | Carrying aac(3)IV flanked by loxP-sites                                                                                                                 | [5]        |
| pKCLP2-gusA-sas16::aac3          | Vector for gene deletion of <i>sas16</i>                                                                                                                | [6]        |
| pSET152-hyg                      | $\Phi$ C31 attachment site, integrative, HygR                                                                                                           | Lab stock  |
| pSET152-sas16                    | For gene <i>sas16</i> complementation                                                                                                                   | This study |
| pSET152-sas16-F250T              | For complementation of Sas16 with point-mutation F250T                                                                                                  | This study |
| pSET152-sas16-A246G              | For complementation of Sas16 with point-mutation A246G                                                                                                  | This study |
| pSET152-sas16-Y248N              | For complementation of Sas16 with point-mutation Y248N                                                                                                  | This study |
| pSET152-sas16-AY246-248GN        | For complementation of Sas16 with point-mutation AY246-248GN                                                                                            | This study |
| pSET152-sas16-YF248-250NT        | For complementation of Sas16 with point-mutation YF248-250NT                                                                                            | This study |
| pSET152-sas16-AF246-250GT        | For complementation of Sas16 with point-mutation AF246-250GT                                                                                            | This study |
| pSET152-sas16-AYF-246-248-250GNT | For complementation of Sas16 with point-mutation AYF-246-248-250GNT                                                                                     | This study |
| pET28a(+)                        | Protein expression vector carrying an N-terminal His <sub>6</sub> -Tag/thrombin/T7 promoter, f1 ori, pBR322 ori                                         | Invitrogen |
| pBluescript SK(-)                | Cloning vector, lacZ' ( $\alpha$ -complementation)                                                                                                      | Stratagene |
| pUC19                            | Cloning and sequencing vector for <i>E. coli</i>                                                                                                        | Invitrogen |
| pBSK-Sas16                       | Plasmid containing gene <i>sas16</i> for subcloning                                                                                                     | This study |
| pET28-Sas16                      | Vector for protein expression of Sas16                                                                                                                  | This study |
| pET28-Sas16-F250T                | Vector for protein expression of Sas16-F250T                                                                                                            | This study |
| pET26 PuR                        | Vector for protein expression of PuR                                                                                                                    | [7]        |
| pET26 PuxB A105V                 | Vector for protein expression of PuxB                                                                                                                   | [7]        |
| pET21-sfp-R4-4                   | Vector for protein expression of sfp-R4-4                                                                                                               | [8]        |
| pET-Trx_1c                       | Vector with an internal hexahistidine tag and a protease cleavage site between the fusion protein and the cloned protein sequence Trx- PCP, T7 promoter | [9]        |
| pET-Trx-A-NMt-PCP                | Vector for protein expression of A-NMt-PCP domain, based on pET-Trx-1c                                                                                  | This study |
| pBSK-NMt                         | Plasmid containing MTase encoding gene for subcloning                                                                                                   | This study |
| pSC101-ccdA                      | Vector for counterselection                                                                                                                             | [10]       |
| P15A-ccdB-amp                    | Vector for counterselection                                                                                                                             | [10]       |
| pBAC1F16                         | Plasmid containing the WS9326A BGC for heterologous expression                                                                                          | This study |
| pBAC1F16-Nmet-amp-ccdB           | Plasmid for the point-mutation of N-methyltransferase domain                                                                                            | This study |
| pBAC1F16-D2014Q                  | Plasmid for the point-mutation of N-methyltransferase domain                                                                                            | This study |
| pBAC1F16-D2014A                  | Plasmid for the point-mutation of N-methyltransferase domain                                                                                            | This study |

**Table S2. Primers used in this study.**

| Primer                    | Sequence (5' to 3')                                                                                 | Purpose                                                                                   |
|---------------------------|-----------------------------------------------------------------------------------------------------|-------------------------------------------------------------------------------------------|
| Vsas4-KO-F                | CAGCGACTTGAGCAGTCTCTCGG                                                                             | For PCR verification of exconjugant <i>S. lividans</i> 1326::1F16                         |
| Vsas4-KO-R                | AGTAGCTGAGGCACACCAGCAC                                                                              |                                                                                           |
| Vsas18-KO-F               | TGCTGGTCACCAACCACCACA                                                                               | For PCR verification of mutant <i>S. lividans</i> 1326::1F16::pKC1132-sas18               |
| Vsas18-KO-R               | TGTTTCGAGGATCAGCCGGATGC                                                                             |                                                                                           |
| apra-M-R                  | GGCTCTTCTCCTTGAGCCACCT                                                                              |                                                                                           |
| P450pET-F                 | ATAgaattcATGACCGACGCCGAGACG                                                                         | For the construction of plasmid pET28-Sas16                                               |
| P450pET-R                 | TCActcgagCTACCAGCCGATCGTCAGCTT                                                                      |                                                                                           |
| For_A_NMt_PCP_NcoI        | ATTccatgGACACCCTGCCCGCCCTG                                                                          | For the construction of plasmid pET-Trx-A-NMt-PCP                                         |
| Rev_A_NMt_PCP_XhoI        | ATTctcgagAACGCTCCAATTCGATGCG                                                                        |                                                                                           |
| SAS16F                    | ATATAagctcCCGACTACACGGCATCCTC                                                                       | For the construction of plasmid pKCLP2-gusA-sas16::aac3                                   |
| SAS16R                    | ATATgaattcGCTCGTCTCCACCGTGTC                                                                        |                                                                                           |
| SAS16-ApraF               | CGCAAGAAATGACCTCAGCTCAGATATAGGGTAACGTCATGGATATCTCTAGATACCG                                          |                                                                                           |
| SAS16-ApraR               | GATGCAGCGGTCGCGTTCGGCGTGAACCTTCATGGCGCCTAAACAAAAGCTGGAGCTC                                          |                                                                                           |
| pET28a-sas16-NdeI-GA-F    | CTGGTGCCGCGCGGCAGCCATATGACCGACGCCGAGACGAAG                                                          | For construction of mutant sas16-F250T expression vector                                  |
| pET28a-sas16-HindIII-GA-R | GGTGTCTCGAGTGCGGCCGAAGCTTCTACCAGCCGATCGTCAGCT                                                       |                                                                                           |
| sas16-MFrg1-F             | TCGCGGACGTGCTCATAGTC                                                                                | For construction of plasmid pSET152-sas16                                                 |
| sas16-MFrg1-R             | GAGCAGCAGCATCTTGGTCATCA                                                                             |                                                                                           |
| F250T-F                   | GACTATGAGCACGTCCGCGAGCTGGCCCGCATCAATGG                                                              | For site-directed single mutation at position 246, 248, 250 of Sas16                      |
| F250T-R                   | TGATGACCAAGATGCTGCTGCTCgcgggcaacgagaccatcgt                                                         |                                                                                           |
| A246G-R                   | TGATGACCAAGATGCTGCTGCTCgggggctacgagttcatcgt                                                         |                                                                                           |
| Y248N-R                   | TGATGACCAAGATGCTGCTGCTCgcgggcaacgagttcatcgt                                                         |                                                                                           |
| AY246-248GN-R             | TGATGACCAAGATGCTGCTGCTCgggggcaacgagttcatcgt                                                         | For site-directed double mutation at position 246, 248, and 250 of Sas16                  |
| YF248-250NT-R             | TGATGACCAAGATGCTGCTGCTCgcgggcaacgagaccatcgt                                                         |                                                                                           |
| AF246-250GT-R             | TGATGACCAAGATGCTGCTGCTCgggggctacgagaccatcgt                                                         |                                                                                           |
| AYF-246-248-250GNT        | TGATGACCAAGATGCTGCTGCTCgggggcaacgagaccatcgt                                                         | For site-directed mutations at position 246, 248, 250 of Sas16                            |
| nMTsas16-D2104Q-F         | gtctgatcatggcggcggcgtcggcgccacgtggagctgtactggggtgccTTTGTTTATTTTCTAAATAC                             | Oligonucleotides containing the D2104Q site mutation for counterselection <sup>[10]</sup> |
| nMTsas16-D2104Q-R         | gggtcggcggcggcgtcggcgccacgttctgatgacctgcccggacagAGCCCCATACGATATAAGTTGT                              |                                                                                           |
| nMTsas16-D2104Q-Res       | gggtcggcggcggcgtcggcgccacgttctgatgacctgcccggacagCTGggcaccctagtagctccacgtgcccggcgaccggcgccatgatcagac | For point mutations of D2104Q in plasmid pBAC1F16                                         |
| nMTsas16-D2104A-F         | gtctgatcatggcggcggcgtcggcgccacgtggagctgtactggggtgccTTTGTTTATTTTCTAAATAC                             | Oligonucleotides containing the D2104A site mutation for counterselection <sup>[10]</sup> |
| nMTsas16-D2104A-R         | gggtcggcggcggcgtcggcgccacgttctgatgacctgcccggacagAGCCCCATACGATATAAGTTGT                              |                                                                                           |
| nMTsas16-D2104A-Res       | gggtcggcggcggcgtcggcgccacgttctgatgacctgcccggacagGGCggcaccctagtagctccacgtgcccggcgaccggcgccatgatcagac | For point mutations of D2104A in plasmid pBAC1F16                                         |
| Vnmet-ccdB-F              | ACAAGTGGCAGGTCATCAAC                                                                                | For verification of the mutagenesis in NMt domain of Sas17                                |
| amp-ccdB-R                | AGCCCCATACGATATAAGTTG                                                                               |                                                                                           |
| VNmetQ2104-R              | AAGTACTGCGCCACCGAGTTG                                                                               |                                                                                           |

**Table S3. Strains used in this study.**

| Strains                                                                         | Relevant characteristics                                                                                                 | Reference  |
|---------------------------------------------------------------------------------|--------------------------------------------------------------------------------------------------------------------------|------------|
| <i>S. asterosporus</i> DSM 41452                                                | Wild type strain of WS9326A producer                                                                                     | DSMZ       |
| <i>S. asterosporus</i> DSM 41452::pUC19Δ3100spec                                | <i>S. asterosporus</i> DSM 41452 strain containing plasmid pUC19Δ3100spec                                                | [11]       |
| <i>S. asterosporus</i> DSM 41452::pKC1132-sas18                                 | Gene inactivation of <i>sas18</i> in the WT strain                                                                       | This study |
| <i>S. lividans</i> 1326::1F16                                                   | <i>S. lividans</i> 1326 containing BAC plasmid pBAC1F16                                                                  | This study |
| <i>S. asterosporus</i> Δ <i>sas16</i>                                           | Gene <i>sas16</i> deletion in the WT strain                                                                              | [11]       |
| <i>S. asterosporus</i> Δ <i>sas16</i> ::pSET152-sas16                           | Sas16 overexpression in the mutant <i>S. asterosporus</i> DSM 41452 Δ <i>sas16</i>                                       | This study |
| <i>S. asterosporus</i> Δ <i>sas16</i> ::pSET152-sas16-F250T                     | Complementation of gene <i>sas16</i> with F250T mutation in <i>S. asterosporus</i> DSM 41452 Δ <i>sas16</i>              | This study |
| <i>S. asterosporus</i> Δ <i>sas16</i> ::pSET152-sas16-A246G                     | Complementation of gene <i>sas16</i> with A246G mutation in <i>S. asterosporus</i> DSM 41452 Δ <i>sas16</i>              | This study |
| <i>S. asterosporus</i> Δ <i>sas16</i> ::pSET152-sas16-Y248N                     | Complementation of gene <i>sas16</i> with Y248N mutation in <i>S. asterosporus</i> DSM 41452 Δ <i>sas16</i>              | This study |
| <i>S. asterosporus</i> Δ <i>sas16</i> ::pSET152-sas16-AY246-248GN               | Complementation of gene <i>sas16</i> with AY246-248GN mutation in <i>S. asterosporus</i> DSM 41452 Δ <i>sas16</i>        | This study |
| <i>S. asterosporus</i> Δ <i>sas16</i> ::pSET152-sas16-YF248-250NT               | Complementation of gene <i>sas16</i> with YF248-250NT mutation in <i>S. asterosporus</i> DSM 41452 Δ <i>sas16</i>        | This study |
| <i>S. asterosporus</i> Δ <i>sas16</i> ::pSET152-sas16-AF246-250GT               | Complementation of gene <i>sas16</i> with AF246-250GT mutation in <i>S. asterosporus</i> DSM 41452 Δ <i>sas16</i>        | This study |
| <i>S. asterosporus</i> Δ <i>sas16</i> ::pSET152-sas16-AYF-246-248-250GNT        | Complementation of gene <i>sas16</i> with AYF-246-248-250GNT mutation in <i>S. asterosporus</i> DSM 41452 Δ <i>sas16</i> | This study |
| <i>E. coli</i> DH5α                                                             | General cloning host                                                                                                     | Invitrogen |
| <i>E. coli</i> ET12567(pUZ8002)                                                 | Methylation-deficient <i>E. coli</i> strain for conjugation with the helper plasmid                                      | Lab stock  |
| <i>E. coli</i> BW25113                                                          | Host for DNA recombination                                                                                               | [5]        |
| <i>E. coli</i> BL21 star (DE3)                                                  | Protein expression host                                                                                                  | Invitrogen |
| <i>E. coli</i> BL21(DE3) pLysS                                                  | Protein expression host                                                                                                  | Invitrogen |
| <i>E. coli</i> Gbred-gyrA462                                                    | Host for <i>ccdB</i> counterselection                                                                                    | [10]       |
| <i>E. coli</i> DH10 β/ pBAC1F16                                                 | <i>E. coli</i> harboring BAC plasmid pBAC1F16                                                                            | This study |
| <i>E. coli</i> DH10 β/pSC101- <i>ccdA</i> /pBAC1F16                             | For point-mutation of N-methyltransferase domain in Sas17                                                                | This study |
| <i>E. coli</i> DH10 β/pSC101- <i>ccdA</i> /pBAC1F16-Nmet-amp- <i>ccdB</i>       | For point-mutation of N-methyltransferase domain in Sas17                                                                | This study |
| <i>E. coli</i> DH10 β/pSC101- <i>ccdA</i> /pBAC1F16-NmetD2104Q-amp- <i>ccdB</i> | For point-mutation of D2104Q in N-methyltransferase domain in Sas17                                                      | This study |
| <i>E. coli</i> DH10 β/pSC101- <i>ccdA</i> /pBAC1F16-NmetD2104A-amp- <i>ccdB</i> | For point-mutation of D2104A in N-methyltransferase domain in Sas17                                                      | This study |
| <i>E. coli</i> BL21 (DE3)::pET28-Sas16                                          | For Sas16 protein expression                                                                                             | This study |
| <i>E. coli</i> BL21 (DE3)::pET28-Sas16-F250T                                    | For Sas16-F250T protein expression                                                                                       | This study |
| <i>E. coli</i> BL21 (DE3)::pET-Trx_1c-A-NMt-PCP                                 | For Trx-A-NMt-PCP protein expression                                                                                     | This study |
| <i>S. lividans</i> 1326/1F16 NmetD2104Q                                         | For inactivation of NMt domain of Sas17                                                                                  | This study |
| <i>S. lividans</i> 1326::1F16 NmetD2104A                                        | For inactivation of NMt domain of Sas17                                                                                  | This study |
| <i>S. asterosporus</i> DSM 41452 ΔNmet                                          | In-frame deletion of gene encoding MTase in the WT strain                                                                | [11]       |
| <i>S. lividans</i> 1326::1F16::pKC1132-sas18                                    | For inactivation of gene <i>sas18</i> in <i>S. lividans</i> 1326::1F16                                                   | This study |

**Table S4. Data collection and refinement statistics for P450<sub>Sas</sub>**

| <b>Data set</b>                        |                                   |
|----------------------------------------|-----------------------------------|
| Space group                            | P 4 <sub>2</sub> 2 <sub>1</sub> 2 |
| Cell constants a, b, c [Å]             | 112.8, 112.8, 146.2               |
| α, β, γ [°]                            | 90, 90, 90                        |
| Resolution limits [Å]                  | 146.15 – 2.0 (2.05 – 2.0)         |
| Completeness (%)                       | 100 (100)                         |
| Unique reflections                     | 64321                             |
| Multiplicity (%)                       | 26.6 (28.1)                       |
| <i>R</i> <sub>merge</sub> <sup>*</sup> | 0.236 (1.802)                     |
| <i>R</i> <sub>p.i.m.</sub>             | 0.047 (0.345)                     |
| Mean <i>I</i> /σ( <i>I</i> )           | 13.1 (2.5)                        |
| CC <sub>1/2</sub>                      | 0.998 (0.390)                     |
| <b>Refinement statistics</b>           |                                   |
| <i>R</i> <sub>cryst</sub> <sup>†</sup> | 0.20                              |
| <i>R</i> <sub>free</sub>               | 0.24                              |
| r.m.s.d. bond lengths [Å]              | 0.0235                            |
| r.m.s.d. bond angles [°]               | 2.30                              |
| Average B-factor [Å <sup>2</sup> ]     | 27                                |
| PDB Code                               | 7OQ6                              |

$$*R_{\text{merge}} = \frac{\sum_{hkl} [(\sum_i |I_i - \langle I \rangle|)] / \sum_i I_i};$$

$$^{\dagger}R_{\text{cryst}} = \frac{\sum_{hkl} ||F_{\text{obs}}| - |F_{\text{calc}}||}{\sum_{hkl} |F_{\text{obs}}|};$$

RMSD: Root Mean Square Deviation is the square root of the mean of the square of the distances between the matched atoms.

Table S5. Structure of WS9326 derivatives determined by HR-MS and MS<sup>2</sup> fragmentation. For MS<sup>2</sup> traces see SI Figures S12-S16.

| Number | Name           | m/z [M+H] <sup>+</sup><br>Theoretical<br>Weight (Da) | m/z [M+H] <sup>+</sup><br>Observed<br>Weight (Da) | Error<br>Δ(ppm) | Molecular<br>Formula                                           | Chemical<br>Structure                                                                                                                              | Producer                       |
|--------|----------------|------------------------------------------------------|---------------------------------------------------|-----------------|----------------------------------------------------------------|----------------------------------------------------------------------------------------------------------------------------------------------------|--------------------------------|
| 1      | <b>WS9326K</b> | 1055.5090                                            | 1055.5072                                         | 1.7             | C <sub>54</sub> H <sub>70</sub> N <sub>8</sub> O <sub>14</sub> | 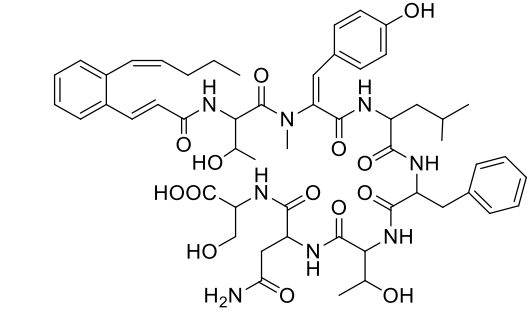 <p>Pentenylcinnamoyl-Thr-NMet-Dht-Leu-Phe-Thr-Asn-Ser-OH</p>   | WT and Mutant<br><i>Δsas16</i> |
| 2      | <b>WS9326L</b> | 1057.5246                                            | 1057.5231                                         | 1.4             | C <sub>54</sub> H <sub>72</sub> N <sub>8</sub> O <sub>14</sub> |  <p>Pentenylcinnamoyl-Thr-NMet-Tyr-Leu-Phe-Thr-Asn-Ser-OH</p>  | WT and Mutant<br><i>Δsas16</i> |
| 3      | <b>WS9326M</b> | 856.4497                                             | 856.4489                                          | 1.0             | C <sub>47</sub> H <sub>61</sub> N <sub>5</sub> O <sub>10</sub> |  <p>Pentenylcinnamoyl-Thr-NMet-Tyr-Leu-Phe-Thr-Asn-Ser-OH</p> | WT and Mutant<br><i>Δsas16</i> |

|   |                |           |           |     |                         |                                                                                                                                                  |                                      |
|---|----------------|-----------|-----------|-----|-------------------------|--------------------------------------------------------------------------------------------------------------------------------------------------|--------------------------------------|
| 4 | <b>WS9326N</b> | 842.4340  | 842.4332  | 1.0 | $C_{46}H_{59}N_5O_{10}$ | 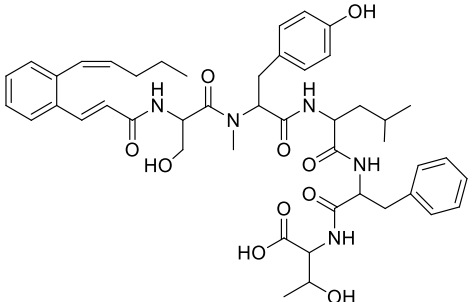 <p>Pentenylcinnamoyl-Ser-NMet-Tyr-Leu-Phe-Thr-OH</p>         | WT and Mutant $\Delta sas16$         |
| 5 | <b>WS9326O</b> | 495.2495  | 495.2491  | 0.8 | $C_{28}H_{34}N_2O_6$    |  <p>Pentenylcinnamoyl-Thr-NMet-Tyr-OH</p>                     | Mutant $\Delta sas16$                |
| 6 | <b>WS9326X</b> | 1038.4828 | 1038.4821 | 0.6 | $C_{54}H_{67}N_7O_{14}$ |  <p>Pentenylcinnamoyl-Thr-NMet-Dht-Leu-Phe-Thr-Asp-Ser-O-</p> | Mutant <i>S. lividans</i> 1326::1F16 |



**Table S6. Summary of NMR Data for WS9326M (DMSO-*d*<sub>6</sub>). For NMR spectrum see SI Figures S32-S36.**

| position         |          | $\delta_c$ (ppm) | $\delta_H$ (J in Hz)    | <sup>1</sup> H- <sup>1</sup> H COSY | HMBC                                             |
|------------------|----------|------------------|-------------------------|-------------------------------------|--------------------------------------------------|
| Acyl             | 1        | 165.8            |                         |                                     |                                                  |
|                  | 2        | 122.8            | 6.79, 1H, d(15.5)       | 7.56                                | 165.8, 133, 132.8,<br>136.7(weak)                |
|                  | 3        | 136.7            | 7.56, 1H, d(15.5)       | 6.79                                | 165.8, 132.8, 136.9, 133,<br>128.7, 125.8, 122.8 |
|                  | 4        | 132.8            |                         |                                     |                                                  |
|                  | 5        | os               |                         |                                     |                                                  |
|                  | 6        | os               |                         |                                     |                                                  |
|                  | 7        | os               |                         |                                     |                                                  |
|                  | 8        | os               |                         |                                     |                                                  |
|                  | 9        | 136.7            |                         |                                     |                                                  |
|                  | 10       | 134              | 5.82, 1H, dt(11.2, 7.8) | 6.56, 1.97                          | 136.7, 21.9, 29.9                                |
|                  | 11       | 127              | 6.56, 1H, d(11.2, 8.7)  | 5.82, 1.97                          | 29.9                                             |
|                  | 12       | 29.9             | 1.96, 2H, m             | 1.35                                |                                                  |
|                  | 13       | 21.9             | 1.35, 2H, m             | 0.79                                |                                                  |
|                  | 14       | 13.5             | 0.79, 3H, m             | 1.35                                |                                                  |
| <sup>1</sup> Thr | NH       |                  | 8.48, 1H, brs           | 4.34                                |                                                  |
|                  | $\alpha$ | 53               | 4.34, 1H, brs           | 8.48                                | 165.7, 171.5, 65.8, 19.4                         |
|                  | $\beta$  | 65.8             | 3.06, 1H, brs           |                                     | 0.68                                             |
|                  | $\gamma$ | 19.4             | 0.68, 3H, os            |                                     |                                                  |
|                  | C=O      | 171.5            |                         |                                     |                                                  |
| <sup>2</sup> Tyr | NMe      | 28.8             | 2.75, 3H, s             |                                     | 171.5, 60.7                                      |
|                  | $\alpha$ | 60.7             | 5.03, 1H, m             | 2.96, 2.79                          | 168.5, 127.2                                     |
|                  | $\beta$  | 33.6             | 2.96, 1H, m             |                                     | 168.5, 127.2, 130.1                              |
|                  |          |                  | 2.79, 1H, m             |                                     | 168.5, 127.2, 130.1                              |
|                  | 1        | 127.2            |                         |                                     |                                                  |
|                  | 2,6      | 130.1            | 7.03, 2H, m             | 6.66                                | 156                                              |
|                  | 3,5      | 115.4            | 6.66, 2H, m             | 7.03                                | 156                                              |
|                  | 4        | 156              |                         |                                     |                                                  |

|                  |     |       |                   |                      |                    |
|------------------|-----|-------|-------------------|----------------------|--------------------|
|                  | C=O | 168.5 |                   |                      |                    |
| <sup>3</sup> Leu | NH  |       | 9.28, 1H, brs     |                      |                    |
|                  | α   | 58.2  | 4.14, 1H, os      | 8.03(NH), 1.18, 1.06 |                    |
|                  | β   | 40.4  | 1.18, 1.06, 2H, m | 4.14, 1.05           | 58.2, 172.1        |
|                  | γ   | 23.7  | 1.05, H, m        | 0.56                 |                    |
|                  | δ   | 22.5  | 0.56, 3H          | 1.05                 |                    |
|                  |     | 22.6  | 0.69, 3H, m       |                      |                    |
|                  | C=O | 172.1 |                   |                      |                    |
| <sup>4</sup> Phe | NH  |       | 8.28, 1H, brs     |                      |                    |
|                  | α   | 54    | 4.57, 1H, m       | 8.28                 | 137.6, 170.9, 37.7 |
|                  | β   | 37.7  | 3.06, 1H, m       |                      | 137.6, 129.4       |
|                  |     |       | 2.71, 1H, os      |                      |                    |
|                  | 1   | 137.6 |                   |                      |                    |
|                  | 2,6 | 127.7 | 7.24, 2H, os      | 7.17                 | 37.7, 125.8, 129.1 |
|                  | 3,5 | 125.8 | 7.17, 2H, os      |                      |                    |
|                  | 4   | 129.1 |                   |                      |                    |
|                  | C=O | 170.9 |                   |                      |                    |
| <sup>5</sup> Thr | NH  |       | 8.28, 1H          |                      |                    |
|                  | α   | 54.3  | 4.77, 1H, m       | 8.28, 3.85           | 164.5, 170.7       |
|                  | β   | 67.1  | 3.85, 1H, m       | 1.02                 | 170.7              |
|                  | γ   | 19.6  | 1.02, 3H, os      | 3.85                 |                    |
|                  | OH  | n/d   |                   |                      |                    |
|                  | C=O | 170.7 |                   |                      |                    |

Note: assignments based on HSQC, COSY, and HMBC experiments. os = overlapping signal, n/d = no data, brs = broad signal.

**Table S7. Summary of NMR Data for WS9326N (DMSO-*d*<sub>6</sub>). For NMR spectrum see SI Figures S37-S41.**

| position         |          | $\delta_c$ (ppm) | $\delta_H$ (J in Hz)    | <sup>1</sup> H- <sup>1</sup> H COSY | HMBC                                        |
|------------------|----------|------------------|-------------------------|-------------------------------------|---------------------------------------------|
| Acyl             | 1        | 167.5            |                         |                                     |                                             |
|                  | 2        | 120.9            | 6.45, 1H, d(16.2)       | 7.70                                | 167.5, 141.4, 132.1, 126.9                  |
|                  | 3        | 141.4            | 7.70, 1H, d(16.2)       | 6.45                                | 167.5, 137.4, 132.1, 126.4,<br>120.9        |
|                  | 4        | 126.9            | n/d                     |                                     |                                             |
|                  | 5        | os               |                         |                                     |                                             |
|                  | 6        | os               |                         |                                     |                                             |
|                  | 7        | os               |                         |                                     |                                             |
|                  | 8        | os               |                         |                                     |                                             |
|                  | 9        | 137.4            | n/d                     |                                     |                                             |
|                  | 10       | 132.7            | 6.53, 1H, d(11.5)       | 5.74,                               | 137.4, 128.9, 29.8                          |
|                  | 11       | 128.9            | 5.74, 1H, dt(11.5, 7.4) | 6.53, 2.06                          | 128.9, 137.4, 29.8, 22.2                    |
|                  | 12       | 29.8             | 2.06, 2H, m             | 1.38                                |                                             |
|                  | 13       | 22.2             | 1.38, 2H, m             | 0.84                                |                                             |
|                  | 14       | 13.6             | 0.84, 3H, m             | 1.38                                |                                             |
| <sup>1</sup> Ser | NH       |                  | os                      |                                     |                                             |
|                  | $\alpha$ | 67.6             | 4.12, 1H, brs           |                                     | 166.9                                       |
|                  | $\beta$  | 48.4             | 3.16, 1H, brs           |                                     |                                             |
|                  | C=O      | 166.9            |                         |                                     |                                             |
| <sup>2</sup> Tyr | NMe      | 28.1             | 2.78, 3H, s             |                                     |                                             |
|                  | $\alpha$ | 60.9             | 5.03, 1H, m             | 2.45, 2.78                          |                                             |
|                  | $\beta$  | 34.2             | 2.78, 1H, m             | 2.45, 5.03                          | 173.6, 128.6, 135.8, 134.3,<br>137.4, 138.6 |
|                  |          |                  | 2.45, 1H, m             |                                     |                                             |
|                  | 1        | 128.6            |                         |                                     |                                             |
|                  | 2,6      | os               |                         |                                     |                                             |
|                  | 3,5      | os               |                         |                                     |                                             |
|                  | 4        | os               |                         |                                     |                                             |
|                  | C=O      | 173.6            |                         |                                     |                                             |

|                  |     |                |                            |            |              |
|------------------|-----|----------------|----------------------------|------------|--------------|
| <sup>3</sup> Leu | NH  |                |                            |            |              |
|                  | α   | 66.9           | 3.87, os                   | 1.03       |              |
|                  | β   | 38.8           | 1.03, 1.24, 2H, m          |            |              |
|                  | γ   | 22.2           | 1.36, H, m                 |            | 22.2, 21.8   |
|                  | δ   | 22.2, 21.8(os) | 0.79(os, 3H), 0.77(os, 3H) |            |              |
|                  | C=O | 172.1          |                            |            |              |
| <sup>4</sup> Phe | NH  |                |                            |            |              |
|                  | α   | 54.1           | 4.54, 1H, m                | 3.03, 2.78 |              |
|                  | β   | os             | 3.03, 1H, m                |            | 127.5, 132.7 |
|                  |     |                | 2.78, 1H, os               |            |              |
|                  | 1   | os             |                            |            |              |
|                  | 2,6 | os             |                            |            |              |
|                  | 3,5 | os             |                            |            |              |
|                  | 4   | os             |                            |            |              |
|                  | C=O | n/d            |                            |            |              |
| <sup>5</sup> Thr | NH  |                | 8.12                       |            |              |
|                  | α   | 54.5           | 4.79, 1H, m                |            |              |
|                  | β   | 66.8           | 3.88, 1H, m                | 1.04       |              |
|                  | γ   | os             | 1.04, 3H, os               | 3.88       |              |
|                  | OH  | n/d            |                            |            |              |
|                  | C=O | n/d            |                            |            |              |

Note: assignments based on HSQC, COSY, and HMBC experiments. os = overlapping signal, n/d = no data, brs = broad signal.

**Table S8. Summary of NMR Data for WS9326X (DMSO-*d*<sub>6</sub>). For NMR spectrum see SI Figures S42-S46.**

| position       | $\delta_c$ (ppm) | $\delta_H$ (J in Hz) | $^1H$ - $^1H$ COSY | HMBC         |
|----------------|------------------|----------------------|--------------------|--------------|
| Acyl           | 1                | 165.3                |                    |              |
|                | 2                | 122.5                | 6.69, 1H, d(15.2)  | 165.3, 133.0 |
|                | 3                | 137.4                | 7.42, 1H, d(15.2)  |              |
|                | 4                | 133.0                | -                  |              |
|                | 5                | 126.0                | 7.53, 1H, d(7.1)   |              |
|                | 6                | 129.6                | 7.33, 1H, m        |              |
|                | 7                | 127.3                | 7.20, 1H, m        |              |
|                | 8                | 129.6                | 7.60, 1H, d(9.5)   |              |
|                | 9                | 137.0                |                    |              |
|                | 10               | 126.8                | 6.50, 1H, d(11.1)  | 5.82         |
|                | 11               | 134.1                | 5.82, 1H, m        | 2.00         |
|                | 12               | 29.8                 | 2.00, 2H, m        | 1.36         |
|                | 13               | 21.9                 | 1.36, 2H, m        | 0.79         |
|                | 14               | 13.6                 | 0.79, 3H, t(7.4)   | 1.36         |
| $^1$ Thr       | NH               |                      | 8.72, 1H, d(9.5)   | 165.3, 53.2  |
|                | $\alpha$         | 53.2                 | 5.33, 1H, t(9.0)   | 5.01         |
|                | $\beta$          | 73.3                 | 5.01, 1H, m        | 1.15         |
|                | $\gamma$         | 16.5                 | 1.15, 3H, d(6.3)   |              |
|                | C=O              | 169.0                |                    |              |
| $^2\Delta$ Tyr | NMe              | 34.2                 | 2.98, 3H, s        | 169.0, 128.4 |
|                | $\alpha$         | 128.4                |                    | 6.13         |
|                | $\beta$          | 131.4                | 6.13, 1H, s        |              |
|                | 1                | 122.9                |                    |              |
|                | 2, 6             | 131.7                | 7.39, 2H, d(8.2)   | 6.58         |
|                | 3, 5             | 114.7                | 6.58, 2H, d(8.2)   |              |
|                | 4                | 158.1                |                    |              |
|                | C=O              | 165.6                |                    |              |
| $^3$ Leu       | NH               |                      | 9.23, 1H, d(2.65)  | 165.6, 53.8  |

|                   |              |       |                   |                |                   |
|-------------------|--------------|-------|-------------------|----------------|-------------------|
|                   | $\alpha$     | 53.8  | 4.06, 1H, m       | 1.26           | 39.0              |
|                   | $\beta$      | 39.0  | 1.26, 2H, m       | 4.06           |                   |
|                   | $\gamma$     | 23.3  | 0.88, 1H, m       |                | 22.1, 22.0        |
|                   | $\delta$     | 22.1  | 0.75, 3H, d(6.8)  |                |                   |
|                   |              | 22.0  | 0.63, 3H, brs     |                |                   |
| C=O               | 172.1        |       |                   |                |                   |
| <sup>4</sup> Phe  | NH           |       | 9.15, 1H, d(8.3)  | 4.33           | 55.6, 36.2, 172.1 |
|                   | $\alpha$     | 55.6  | 4.33, 1H, m       | NH(9.15), 3.27 |                   |
|                   | $\beta$      | 36.2  | 3.27, 1H, m       | 4.33           | 138.6, 128.9      |
|                   |              |       | 2.71, 1H, m       | 4.33           |                   |
|                   | 1            | 138.6 |                   |                |                   |
|                   | 2,6          | 128.9 | 7.32, 2H, d(7.6)  |                |                   |
|                   | 3,5          | 127.9 | 7.27, 2H, t(14.9) | 6.68           |                   |
|                   | 4            | 123.0 | 6.68, 1H, m       |                |                   |
| C=O               | 170.1        |       |                   |                |                   |
| <sup>5</sup> Thr  | NH           |       | 7.53, 1H, d(7.41) | 4.38           | 170.1, 68.1, 170  |
|                   | $\alpha$     | 57.0  | 4.38, 1H, m       | NH(7.53)       |                   |
|                   | $\beta$      | 68.1  | 4.27, 1H, m       | 0.63           |                   |
|                   | $\gamma$     | 22.9  | 0.63, 3H, brs     | 4.27           |                   |
|                   | C=O          | 170.0 |                   |                |                   |
| <sup>6</sup> Asp  | NH           |       | 8.48, 1H, d(7.2)  |                | 170.0, 35.8       |
|                   | $\alpha$     | 50.6  | 4.45, 1H, m       | 2.64           | 171.0, 171.8      |
|                   | $\beta$      | 35.8  | 2.64, 1H, m       | 4.45           |                   |
|                   | $\gamma$ C=O | 171.8 |                   |                |                   |
|                   | C=O          | 171.0 |                   |                |                   |
|                   | OH           |       | 2.53, 1H, t(16.7) |                | 56.0, 60.7, 168.8 |
| <sup>7</sup> Ser  | NH           |       | 8.50, 1H, d(9.5)  | 4.33           |                   |
|                   | $\alpha$     | 56.0  | 4.33, 1H, m       | NH(8.50)       | 168.8             |
|                   | $\beta$      | 60.7  | 3.24, 1H, m(5.2)  | 4.33           |                   |
| 3.16, 1H, t(19.3) |              |       |                   |                |                   |

|  |     |       |               |  |      |
|--|-----|-------|---------------|--|------|
|  | OH  |       | 4.81, 1H, brs |  | 60.7 |
|  | C=O | 168.8 |               |  |      |

Note: assignments based on HSQC, COSY, and HMBC experiments. os = overlapping signal, n/d = no data, brs = broad signal.

**Table S9. Structural comparisons of known P450 structures with similarity to P450<sub>Sas</sub> as revealed by a Dali search.**<sup>[12]</sup>

| Rank | PDB ID | Chain | Z-score | RMSD | Residues matched | Residues total | % ID | Role*                                    | Citation |
|------|--------|-------|---------|------|------------------|----------------|------|------------------------------------------|----------|
| 1    | 5Y1I   | B     | 43.7    | 2.3  | 367              | 394            | 38   | Macrolide FD-891 biosynthesis (GfsF)     | [13]     |
| 35   | 2Z36   | A     | 42.0    | 2.7  | 372              | 403            | 39   | MoxA Cyp105                              | [14]     |
| 38   | 3ABB   | A     | 41.1    | 2.5  | 355              | 383            | 42   | Filipin biosynthesis CYP105D6            | [15]     |
| 44   | 5FOI   | B     | 40.4    | 2.6  | 359              | 388            | 35   | Mycinamicin VIII C21 hydroxylase (MycC1) | [16]     |
| 51   | 5X7E   | A     | 40.0    | 2.8  | 366              | 404            | 38   | Vitamin D3 dihydroxylase                 | [17]     |
| 108  | 2WI9   | A     | 38.5    | 3.3  | 360              | 396            | 38   | Pikromycin biosynthesis (PikC)           | [18]     |
| 137  | 1UED   | A     | 38.1    | 2.8  | 355              | 391            | 32   | OxyC from vancomycin biosynthesis        | [19]     |
| 196  | 1OXA   | A     | 37.5    | 3.2  | 358              | 403            | 35   | Erythromycin biosynthesis (EryF)         | [20]     |
| 222  | 3MGX   | B     | 37.2    | 2.7  | 354              | 391            | 25   | OxyD from balhimycin biosynthesis        | [21]     |
| 288  | 4PXH   | E     | 36.7    | 3.0  | 357              | 407            | 23   | P450 <sub>Sky</sub> -PCP complex         | [22]     |
| 421  | 1LFK   | A     | 35.3    | 3.2  | 345              | 375            | 31   | OxyB from vancomycin biosynthesis        | [23]     |

\* Blue text indicates a role in hydroxylation of a macrolide or large non-polar molecule; red text indicates oxidation of a peptidyl-PCP substrate; green text indicates  $\beta$ -hydroxylation of an aminoacyl-PCP substrate.

**Table S10. Summary of putative peptide intermediate species captured in *S. asterosporus* strains.**

| <i>S. asterosporus</i> strain                          | Wild type <sup>[a]</sup>                      |                          |                                         | $\Delta sas16::pSET152-sas16$ <sup>[b]</sup> |                     |                                        | $\Delta sas16$ <sup>[b]</sup> |            |                       |
|--------------------------------------------------------|-----------------------------------------------|--------------------------|-----------------------------------------|----------------------------------------------|---------------------|----------------------------------------|-------------------------------|------------|-----------------------|
|                                                        | 1<br>(Tyr)                                    | 2<br>(Gly)               | 3<br>( $\beta$ -Ala)                    | 1<br>(Tyr)                                   | 2<br>(Gly)          | 3<br>( $\beta$ -Ala)                   | 1<br>(Tyr)                    | 2<br>(Gly) | 3<br>( $\beta$ -Ala)  |
| Probe utilised/<br>intermediates<br>offloaded<br>from: |                                               |                          |                                         |                                              |                     |                                        |                               |            |                       |
| M1                                                     | <i>m/z</i> 649***<br>(4)<br>and 647**<br>(5)  | <i>m/z</i> 529** (6)     | <i>m/z</i> 543***<br>(7)                | <i>m/z</i> 649** (4)<br>and 647* (5)         | n.d.                | <i>m/z</i> 543** (7)                   | <i>m/z</i> 649** (4)          | n.d.       | <i>m/z</i> 543** (7)  |
| M2                                                     |                                               | <i>m/z</i> 704** (8)     | <i>m/z</i> 720** (18)<br>and 718** (9)  |                                              | <i>m/z</i> 704* (8) | <i>m/z</i> 720** (18)<br>and 718** (9) |                               | n.d.       | n.d.                  |
| M3                                                     | <i>m/z</i> 923* (10)                          | <i>m/z</i> 817* (11)     | <i>m/z</i> 831* (12)                    | n.d.                                         | n.d.                | <i>m/z</i> 831* (12)                   | n.d.                          | n.d.       | n.d.                  |
| M4                                                     | <i>m/z</i> 1072*<br>(19)<br>and 1070*<br>(13) |                          |                                         | <i>m/z</i> 1072* (19)<br>and 1070* (13)      |                     |                                        | <i>m/z</i> 1072* (19)         |            |                       |
| M5                                                     | <i>m/z</i> 1171* (14)                         | <i>m/z</i> 1065*<br>(15) | <i>m/z</i> 1081* (20)<br>and 1079* (16) | n.d.                                         | n.d.                | <i>m/z</i> 1081* (20)                  | n.d.                          | n.d.       | <i>m/z</i> 1081* (20) |

<sup>[a]</sup>grown in liquid culture and on plates, 2mM probe concentration; <sup>[b]</sup> grown on plates, 2mM probe concentration; \*\*\* high abundance, clearly detectable species; \*\* detectable species; \* species present in traces; n.d. = not detectable; *m/z* putative intermediate [M+H]<sup>+</sup> masses given, with those in red featuring dehydrotyrosine (Dht). For proposed species structures and HR-MS<sup>n</sup> analysis see **SI Figures S27-30**.



## 2. SI Figures

**Figure S1. UV/Vis spectra of P450<sub>Sas</sub> and binding responses for possible soluble substrates.** (A) P450<sub>Sas</sub> UV/Vis spectrum showing the resting state heme Soret absorption (blue) and the reduced, CO-complexed form (red). (B) Possible soluble substrates for P450<sub>Sas</sub>, including intermediates at the amino acid, peptide, and cyclic peptide state. (C) Final spectra after titration of the potential soluble substrates.

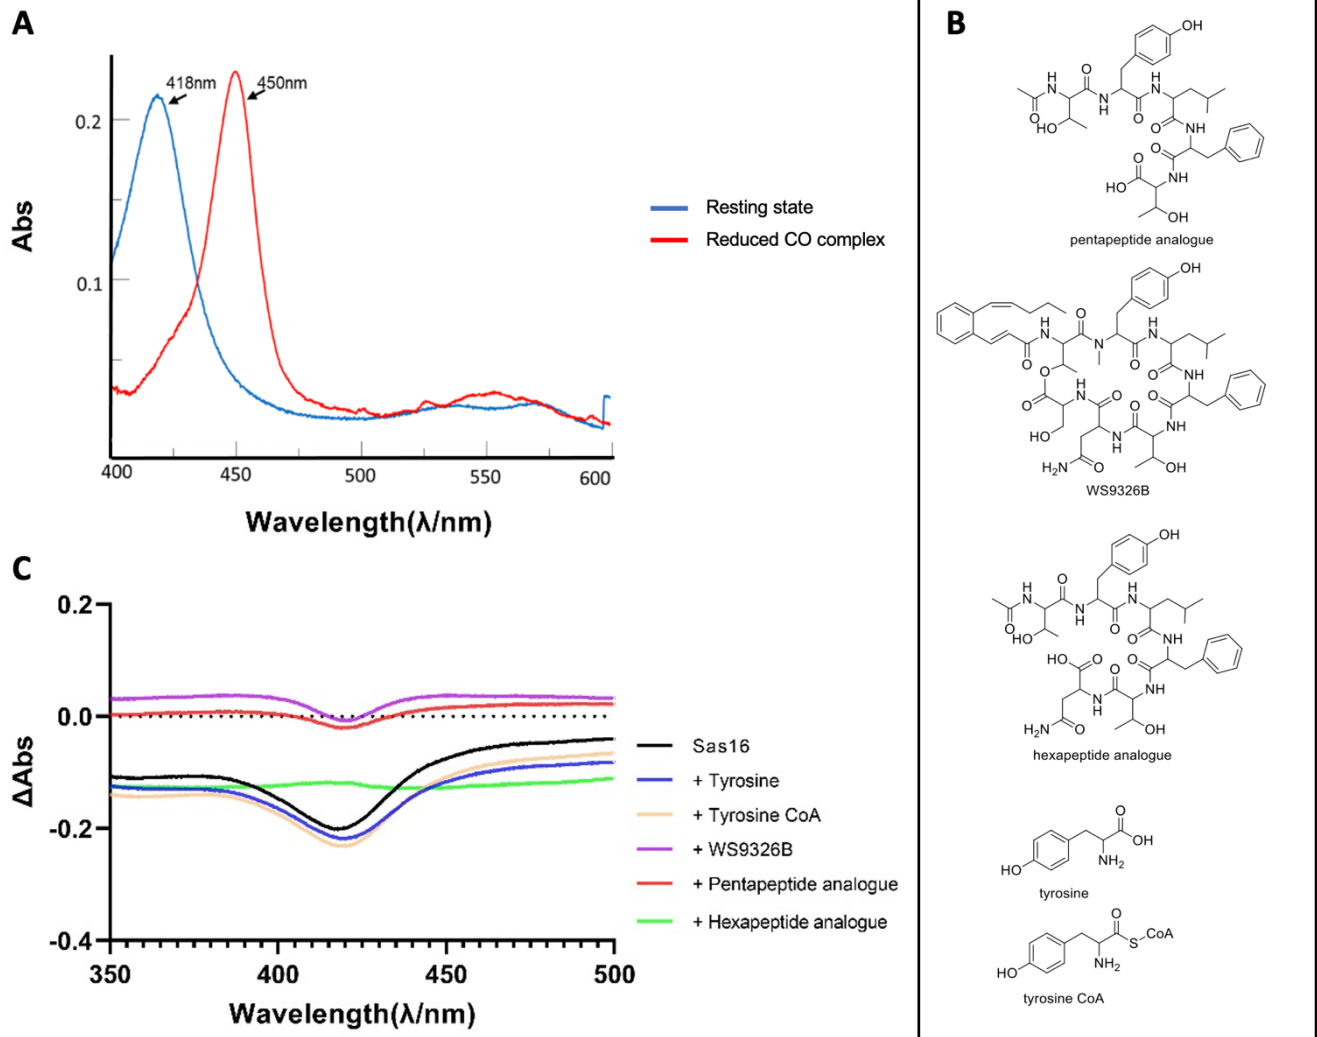

**Figure S2. Conserved sequence regions of 20 P450 enzymes implicated in the  $\beta$ -hydroxylation of PCP-bound amino acid residues and a comparison to P450<sub>Sas</sub>.** Sequence residues indicated (based on numbering of OxyD<sub>bal</sub>) are responsible for maintaining the arrangement of secondary structure elements and active site of these P450s to allow them to bind and hydroxylate their PCP-bound amino acid substrates; comparison to Sas16 shows a very high level of mismatches with this consensus sequence (17) as opposed to P450s involved in the  $\beta$ -hydroxylation of aminoacyl-PCPs (0-6, average <1 per sequence). This does not support the presence of the conserved active site geometry of  $\beta$ -hydroxylating P450s and implies the substrate of Sas16 is not an aminoacyl-PCP.

| P450                                | B-B <sub>2</sub> loop<br>N-term. |     | B-B <sub>2</sub> loop<br>C-term. |     |          |          |     |     |     | F-helix  |     |     |          | G-helix |     |          |     |          | I-helix  |          |     | $\beta$ -1 sheet |          |     | Mis-<br>matc<br>hes |
|-------------------------------------|----------------------------------|-----|----------------------------------|-----|----------|----------|-----|-----|-----|----------|-----|-----|----------|---------|-----|----------|-----|----------|----------|----------|-----|------------------|----------|-----|---------------------|
|                                     | 69                               | 72  | 82                               | 83  | 84       | 86       | 89  | 90  | 171 | 172      | 173 | 174 | 187      | 188     | 189 | 190      | 193 | 228      | 229      | 235      | 282 | 283              | 284      |     |                     |
| OxyD <sub>bal</sub>                 | G                                | I   | S                                | G   | G        | M        | V   | S   | H   | A        | F   | G   | A        | H       | T   | E        | V   | N        | C        | G        | A   | M                | H        | 0   |                     |
| OxyD <sub>van</sub>                 | G                                | I   | S                                | G   | G        | M        | V   | S   | H   | A        | F   | G   | A        | H       | T   | E        | V   | N        | C        | G        | A   | M                | H        | 0   |                     |
| OxyD <sub>cep</sub>                 | G                                | I   | S                                | G   | G        | M        | V   | S   | H   | A        | F   | G   | A        | H       | T   | E        | V   | N        | C        | G        | A   | M                | H        | 0   |                     |
| OxyD <sub>pek</sub>                 | G                                | I   | S                                | G   | G        | M        | V   | S   | H   | A        | F   | G   | A        | H       | T   | E        | V   | N        | C        | G        | A   | M                | H        | 0   |                     |
| OxyD <sub>veg</sub>                 | G                                | I   | S                                | G   | G        | M        | V   | S   | H   | A        | F   | G   | A        | H       | T   | E        | V   | N        | C        | G        | A   | M                | H        | 0   |                     |
| NikQ                                | G                                | L   | A                                | A   | G        | M        | I   | T   | F   | A        | W   | S   | A        | H       | T   | E        | L   | N        | C        | G        | V   | M                | H        | 2   |                     |
| SanQ                                | G                                | L   | A                                | A   | G        | M        | I   | T   | F   | A        | W   | S   | A        | H       | T   | E        | L   | N        | C        | G        | V   | M                | H        | 2   |                     |
| PyrI                                | G                                | L   | A                                | G   | G        | M        | I   | T   | T   | A        | L   | D   | A        | Q       | S   | D        | N   | N        | C        | G        | A   | L                | H        | 5   |                     |
| RubC2                               | G                                | L   | A                                | S   | G        | M        | V   | T   | H   | A        | W   | S   | A        | K       | S   | E        | L   | N        | C        | G        | S   | L                | H        | 0   |                     |
| NovI                                | G                                | L   | A                                | S   | G        | M        | V   | T   | H   | A        | W   | S   | A        | K       | N   | E        | L   | N        | C        | G        | S   | L                | H        | 0   |                     |
| CouI                                | G                                | L   | A                                | S   | G        | M        | V   | T   | H   | A        | W   | S   | A        | K       | N   | E        | L   | N        | C        | G        | S   | L                | H        | 0   |                     |
| CloI                                | G                                | L   | A                                | S   | G        | M        | V   | T   | H   | A        | W   | S   | A        | K       | N   | E        | L   | N        | C        | G        | S   | L                | H        | 0   |                     |
| SimI                                | G                                | L   | A                                | S   | R        | M        | L   | T   | H   | A        | L   | S   | A        | K       | N   | E        | L   | N        | C        | G        | S   | L                | H        | 2   |                     |
| CinD                                | G                                | L   | G                                | G   | G        | M        | V   | T   | A   | A        | L   | S   | A        | R       | N   | E        | L   | N        | C        | G        | S   | M                | H        | 0   |                     |
| SalD                                | G                                | L   | G                                | A   | G        | M        | V   | T   | T   | A        | L   | S   | A        | R       | N   | E        | L   | N        | C        | G        | S   | M                | H        | 0   |                     |
| Sky32                               | G                                | L   | A                                | A   | G        | M        | V   | T   | S   | A        | L   | S   | A        | R       | N   | E        | L   | N        | C        | G        | A   | M                | H        | 0   |                     |
| TioI                                | G                                | L   | A                                | G   | G        | M        | V   | T   | N   | A        | L   | S   | A        | R       | N   | Q        | L   | N        | C        | G        | A   | M                | H        | 1   |                     |
| Ecm12                               | G                                | L   | A                                | G   | G        | M        | V   | T   | L   | A        | L   | S   | A        | R       | N   | E        | G   | N        | C        | G        | A   | M                | H        | 0   |                     |
| TrsB                                | G                                | L   | A                                | G   | G        | M        | V   | S   | E   | A        | L   | S   | A        | R       | N   | E        | L   | N        | C        | G        | G   | M                | H        | 1   |                     |
| ZmbVIIc                             | G                                | L   | A                                | G   | G        | M        | V   | T   | A   | A        | V   | A   | A        | H       | H   | E        | S   | H        | C        | G        | A   | A                | H        | 6   |                     |
| Matches % <sup>a</sup>              | 100                              | 100 | 100                              | 100 | 95       | 100      | 100 | 100 | 50  | 100      | 95  | 95  | 100      | 95      | 95  | 90       | 80  | 95       | 100      | 100      | 950 | 95               | 100      | 0-6 |                     |
| Suggested<br>Consensus <sup>b</sup> | <u>G</u>                         | I   | (1)                              | (1) | <u>G</u> | <u>M</u> | L   | T   | H   | <u>A</u> | L   | (1) | <u>A</u> | (2)     | (3) | <u>E</u> | V   | <u>N</u> | <u>C</u> | <u>G</u> | (1) | M                | <u>H</u> |     |                     |
| Sas16                               | T                                | I   | D                                | A   | K        | L        | T   | M   | I   | M        | V   | G   | <u>A</u> | N       | E   | <u>E</u> | K   | M        | T        | A        | V   | E                | I        | 17  |                     |

<sup>a</sup> Percentage of residues matching to the consensus rule, based upon identity.

<sup>b</sup> Identity residues are emboldened and underlined; 1-3 similar residues indicated in normal font. Exceptions are: <sup>(1)</sup> Small residue (S, G, A), <sup>(2)</sup> Positively Charged Residue (K, H, R), <sup>(3)</sup> Hydrophilic Residue (N, T, S).

**Figure S3. Sequence alignment of the aminoacyl-PCP  $\beta$ -hydroxylating P450 OxyD<sub>bal</sub> with P450<sub>Sas</sub>.** Highlighted sequence residues as indicated in SI Figure S2 that are responsible for maintaining the arrangement of secondary structure elements and active site of OxyD<sub>bal</sub> (as found in the structure of this P450, PDB code: 3MGX); colours are the same as in Figure 2A.

|       |                                                                                                                                                                                                                                                  |     |
|-------|--------------------------------------------------------------------------------------------------------------------------------------------------------------------------------------------------------------------------------------------------|-----|
| OxyD  | -----MQTTNAVDLGNPDLYTTLERHARWRELAEDAMVWSDPGSSPSGFWSVFSHRA                                                                                                                                                                                        | 53  |
| Sas16 | MTDAETKMAKCPVAPHGWPPLL-----PEYDQLPEGRPL-TQVTMPSGSKAWLVAQHDH                                                                                                                                                                                      | 54  |
|       | * . .. * * : : : * : . * * * * . *                                                                                                                                                                                                               |     |
| OxyD  | CAAVLAPSAPL-TSEYGM <sup>I</sup> GFDR-----DHPD <sup>N</sup> SGGR <sup>M</sup> MV <sup>V</sup> SEHEQHRKLRKLVGPLLS                                                                                                                                  | 107 |
| Sas16 | IQRLLADNRF <sup>S</sup> V <sup>E</sup> PHPT <sup>F</sup> PI <sup>R</sup> FPAPQ <sup>E</sup> LLDMIARD <sup>A</sup> KNLLV <sup>T</sup> MD <sup>P</sup> PR <sup>H</sup> TR <sup>V</sup> RQ <sup>M</sup> AL <sup>P</sup> DF <sup>T</sup>             | 114 |
|       | : ** . : * * * * . . . . : : * : : * : : . * : :                                                                                                                                                                                                 |     |
| OxyD  | RAAARKLAERVRIEVDVLRV <sup>L</sup> -----DGEVCD <sup>A</sup> AAT <sup>I</sup> GPRI <sup>P</sup> AAV <sup>V</sup> CE <sup>I</sup> LG <sup>V</sup> PAEDED                                                                                            | 162 |
| Sas16 | IKAAEKLRP <sup>---</sup> RMQDLIDY <sup>Y</sup> L <sup>D</sup> KMEAE <sup>G</sup> APAD <sup>L</sup> VQALAL <sup>P</sup> FP <sup>A</sup> Q <sup>V</sup> ICELAGIPENDRE                                                                              | 170 |
|       | * * . * * : : * : : * : * . * : . : * * * : * : * : * :                                                                                                                                                                                          |     |
| OxyD  | MLIDL <sup>T</sup> N <sup>H</sup> A <sup>F</sup> G <sup>E</sup> DELFDGMT <sup>P</sup> RQ <sup>A</sup> H <sup>T</sup> E <sup>I</sup> L <sup>V</sup> Y <sup>F</sup> DELITARRKEPGDDL <sup>V</sup> ST <sup>L</sup> V <sup>T</sup> DDD <sup>---</sup> | 219 |
| Sas16 | IFTRNAAIMV <sup>G</sup> -TRHSY <sup>T</sup> MEQ <sup>K</sup> LAANEEL <sup>M</sup> KY <sup>F</sup> AAL <sup>V</sup> TEK <sup>Q</sup> SNPTDDMLGNFIARAGK <sup>T</sup> D                                                                             | 229 |
|       | : : : . * . : * : * : * * * : * : * * : : : * * : : : : : .                                                                                                                                                                                      |     |
| OxyD  | -LTIDDVLL <sup>N</sup> C <sup>D</sup> NVLI <sup>G</sup> NETTRHAI <sup>T</sup> GAVHALATVPGLLTALRDGSA-DVD <sup>T</sup> VVEE <sup>V</sup> LR                                                                                                        | 277 |
| Sas16 | EFDH <sup>H</sup> GL <sup>T</sup> LM <sup>T</sup> KMLLLAGYEFIVNRIALGIQALVENPEQLAALRADLPGLMPKT <sup>V</sup> DEV <sup>L</sup> R                                                                                                                    | 289 |
|       | : . . : * . : * : * * : * : . : * * . * * : * * * . : . * : * * * *                                                                                                                                                                              |     |
| OxyD  | WTSP <sup>A</sup> - <sup>M</sup> H <sup>V</sup> LRVTTADV <sup>T</sup> INGRDL <sup>P</sup> SG <sup>T</sup> PV <sup>V</sup> AWLPAANRDPAE <sup>F</sup> DD <sup>P</sup> DT <sup>F</sup> LPGRKPNR <sup>H</sup> I                                      | 336 |
| Sas16 | YYSLVDEI <sup>I</sup> ARVALEDVEIDGVTIKAGEGILVLKGLGDRDPSKYPNPDV <sup>F</sup> DIHRDSRD <sup>H</sup> L                                                                                                                                              | 349 |
|       | : * . : * * : * * * * : * : . . : * * : : * * . * . . * :                                                                                                                                                                                        |     |
| OxyD  | TFGHGMHHC <sup>L</sup> GSALARIELSVVLRVLAERVSRVDLEREPAWLR <sup>A</sup> IVVQGY <sup>---</sup> REL <sup>P</sup> V <sup>R</sup> F                                                                                                                    | 393 |
| Sas16 | AFGYGVH <sup>Q</sup> CLG <sup>H</sup> VARLMLEMCLTSLVERFPGLH <sup>L</sup> VEGDEPIEL <sup>---</sup> IDGLPPVH <sup>K</sup> L <sup>T</sup> IG <sup>W</sup>                                                                                           | 407 |
|       | : * * : * * : * * : * : * * . : * . : . : * : * : : :                                                                                                                                                                                            |     |
| OxyD  | TGR 396                                                                                                                                                                                                                                          |     |
| Sas16 | --- 407                                                                                                                                                                                                                                          |     |

**Figure S4. Structural comparisons of P450<sub>Sas</sub> with P450 homologues involved in the modification of peptidyl carrier protein-bound substrates.** Structures include OxyB (A, pale pink; PDB code: 1LFK, chain A) and OxyC (B, pale blue; PDB code: 1UED, chain A) from the GPA cyclisation pathway of vancomycin (upper), together with OxyD (C, pale orange; PDB code: 3MGX, chain A) and P450<sub>sky</sub> (D, pale yellow PDB code: 4LOE, chain A) shown to be responsible for the  $\beta$ -hydroxylation of aminoacyl-PCP substrates in balhimycin and skyllamycin respectively(lower). P450<sub>Sas</sub> (chain A) is coloured using the scheme found in Figure 2.

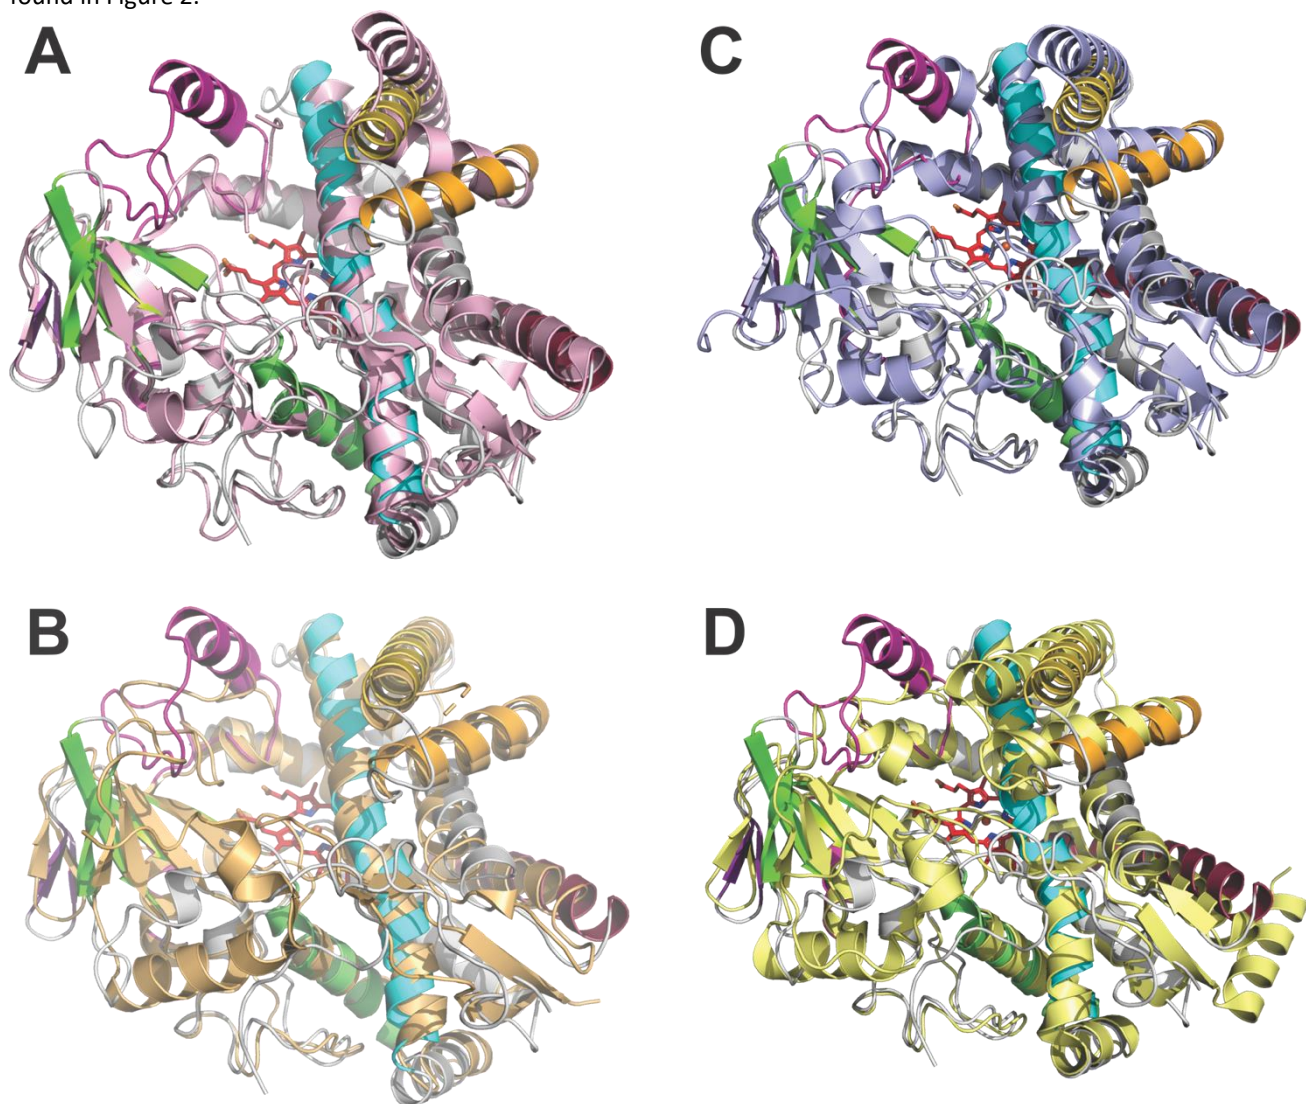

**Figure S5. Modelling and molecular dynamics simulations to probe conformations of P450<sub>Sas</sub> N-terminal and C-terminal loops.** (A) Comparison of the C-terminal loops of chain A of the crystal structure of P450<sub>Sas</sub> (blue), the final frame of a 1  $\mu$ s MD simulation initiated from chain A of P450<sub>Sas</sub> (orange), a physics-based model of P450<sub>Sas</sub> generated using the AlphaFold v2.0<sup>[24]</sup> Google Colab notebook (magenta), and the crystal structure of P450<sub>sky</sub> (4PWV, green). Significant crystal packing interactions are observed between the C-terminal loop and the neighbouring chain in the asymmetric unit (grey surface) in the P450<sub>Sas</sub> crystal structure. The alpha-carbons of Leu397 (Leu397<sub>Ca</sub>) are shown as spheres, heme is shown as yellow sticks, and the C11 disulfide bond is shown as ball-and-sticks. (B) Plots showing the distance between Leu397<sub>Ca</sub> and the heme iron during two independent molecular dynamics simulations initiated from chain A of the P450<sub>Sas</sub> crystal structure. (C) Alternate view highlighting the distinct conformations of the N-terminal region in the crystal structure of P450<sub>Sas</sub>, final frame of the 1  $\mu$ s MD simulation (replicate 1), AlphaFold2 model, and P450<sub>sky</sub> (PDB 4PWV). While the C-terminal loop's apex lies *between* the heme and the N-terminal region in P450<sub>sky</sub> and the AlphaFold2 model of P450<sub>Sas</sub>, it does not protrude as far into the active site in the crystal structure of P450<sub>Sas</sub>, possibly due to being blocked by the conformation of the N-terminal region that is induced by the presence of the C11 disulfide bond.

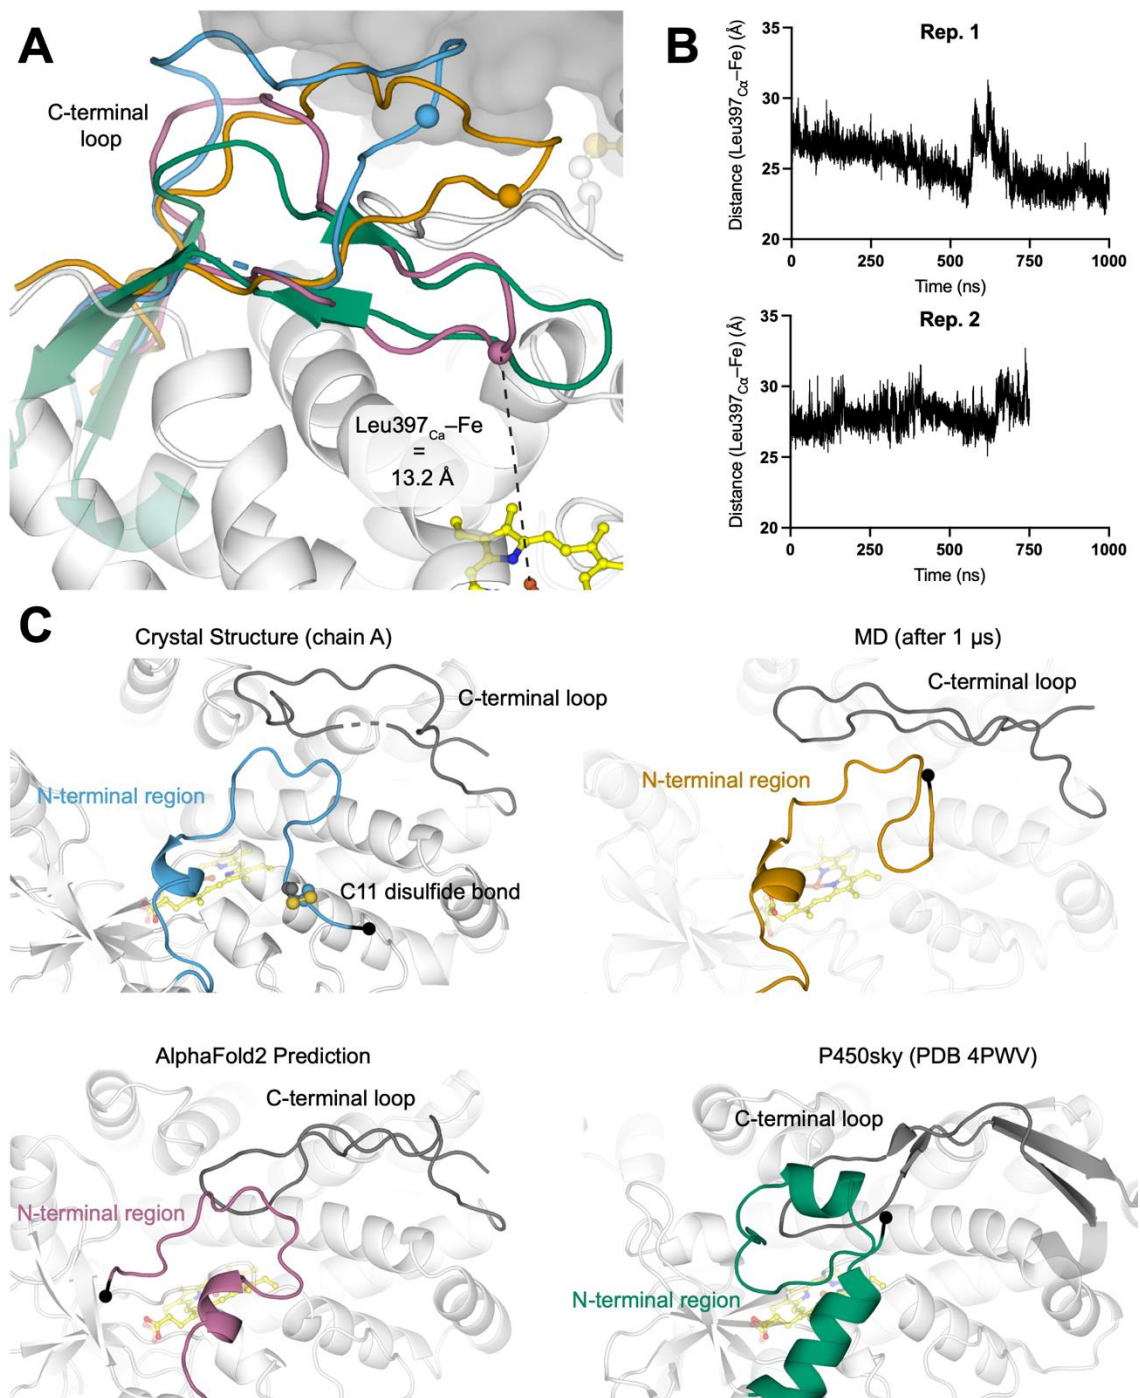



**Figure S6. P450<sub>Sas</sub> active site mutants constructed for *in vivo* analysis.** (A) Partial alignment of P450<sub>Sas</sub> sequence with OxyB<sub>bal</sub> including the I-helix that contains the active site residues critical for oxygen activation in the majority of P450 enzymes (typically an acid/ alcohol pair, highlighted in green), showing the three positions explored through mutation of the Sas16 gene *in vivo* (A246, Y248, F250, shown in yellow); mutations converted the equivalent positions into the residues found in OxyB<sub>bal</sub> and included all single mutants (A246G, Y248N, F250T), the three possible double mutants (AY to GN, YF to NT, AF to GT) and the triple mutant (AFY to GNT). (B) Analysis of strains containing the comparable mutations in the sas16 gene. HPLC-MS chromatograms monitoring for the mass of WS9326A ([M-H]<sup>-</sup> 1035, negative mode) were obtained from the culture of *S. asteroides* Δsas16::pSET152-sas16-F250T (black, (1)), *S. asteroides* Δsas16::pSET152-sas16-A246G (red, (2)), *S. asteroides* Δsas16::pSET152-sas16-Y248N (green, (3)), *S. asteroides* Δsas16::pSET152-sas16-AY246-248GN (blue, (4)), *S. asteroides* Δsas16::pSET152-sas16-YF248-250NT (purple, (5)), *S. asteroides* Δsas16::pSET152-sas16-AF246-250GT (maroon, (6)), *S. asteroides* Δsas16::pSET152-sas16-AYF-246-248-250GNT (pale green (7)), *S. asteroides* Δsas16 (pale blue, (8)), *S. asteroides* Δsas16::pSET152-sas16 (orange, (9)) and the wildtype strain (magenta, (10)).

**A.**

|       |                                                                                         |     |
|-------|-----------------------------------------------------------------------------------------|-----|
| OxyD  | -LTIDDVLLNCDNVLIGGNETTRHAITGAVHALATVPGLLTALRDGSA-DVDTVVVEEVLK                           | 277 |
| Sas16 | EFDHHGLTLMTKMLLL <sup>AGYEF</sup> I <sup>IVNRI</sup> ALGIQALVENPEQLAALRADLPGLMPKTVDEVLK | 289 |
|       | : . . : * . : * : * * : * : . : : * * . * * : * * * . : . . * : * * * *                 |     |

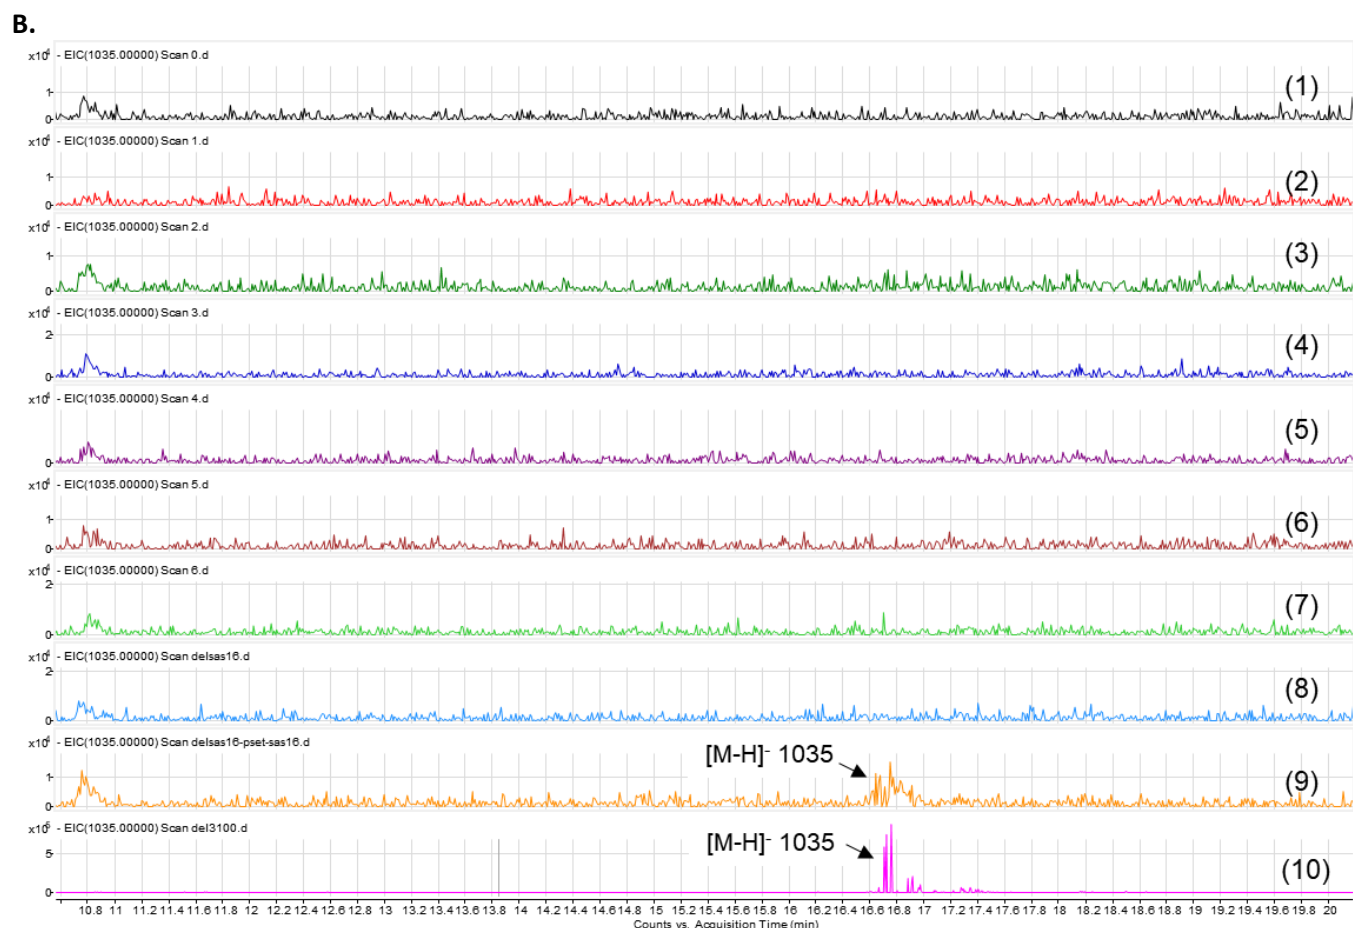

**Figure S7. Comparison of reduced CO difference spectra of P450<sub>Sas</sub> together with protein expression (wild type and F250T mutant).** (A) P450<sub>Sas</sub> UV/Vis spectrum showing the resting state heme solet (wild type – red; F250T mutant – green) and difference spectra of the reduced, CO-complexed form (wild type – black; F250T mutant - blue) showing that both enzymes are apparently correctly folded. (B) SDS-PAGE gel of purified P450<sub>Sas</sub> proteins showing identical behaviour.

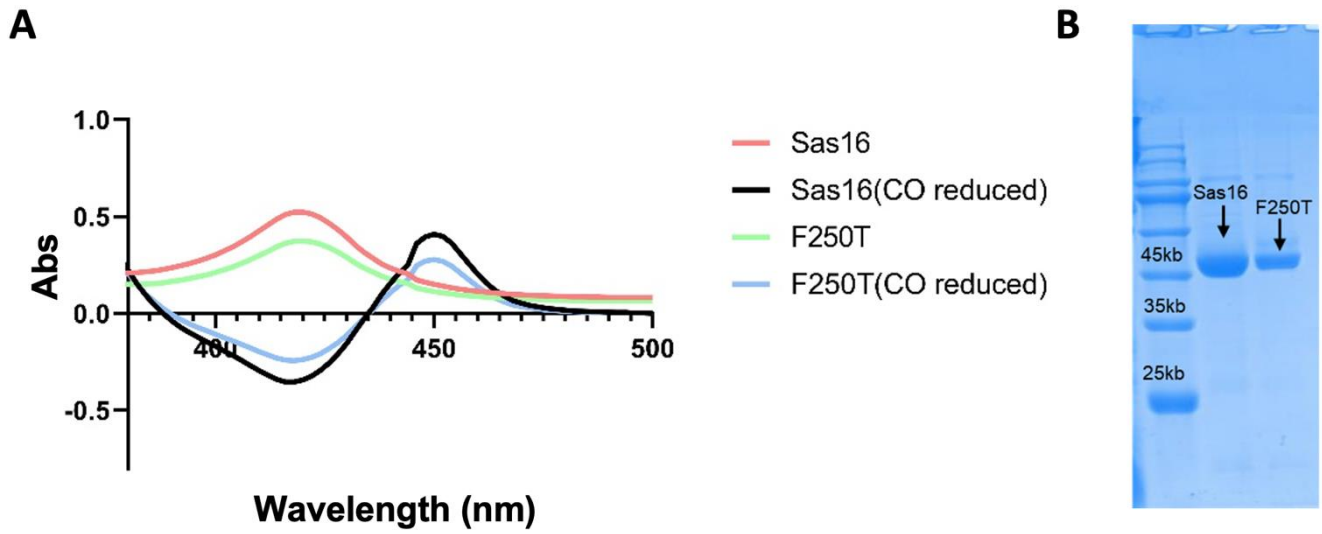

**Figure S8. Analysis of the *in vitro* activity of the Sas17 module 2 Trx-A-NMt-PCP construct.** (A) Loading of Tyr by the A-domain followed by cleavage with methylamine, confirming PCP-loading by detection of the methylamide by LCMS. (B) Activity of the NMt domain confirmed by loading Tyr-CoA using Sfp followed by incubation with SAM, methylamine cleavage and subsequent LC MS analysis.

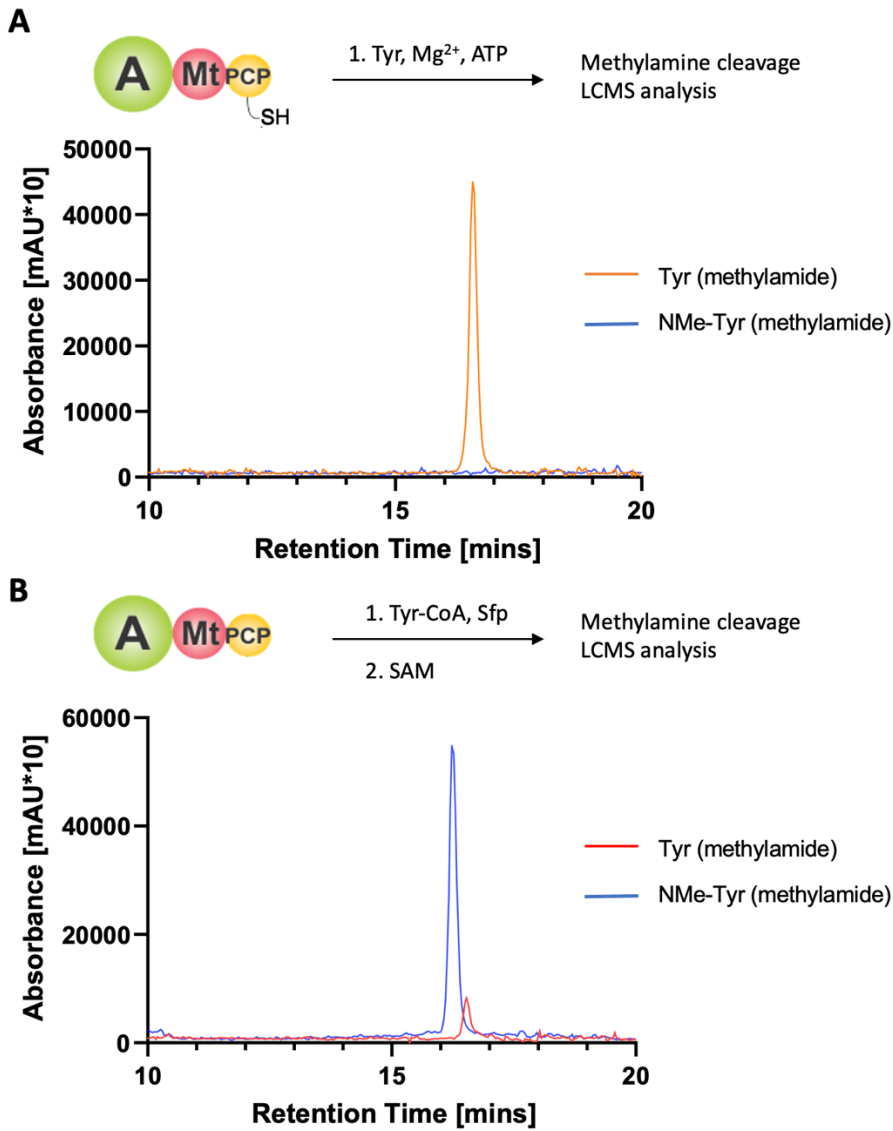



**Figure S9. Generating the point-mutations (D2014Q, D2014A) of the Nmt domain in Sas17.** (A) Scheme of the workflow to generate in vivo point mutations of the BAC plasmid pBAC1F16 using *ccdB* counterselection recombineering. Step 1: plasmid pBAC1F16 was transformed into strain DH10  $\beta$ /pSC101-*ccdA* to yield DH10  $\beta$ /pSC101-*ccdA*/1F16, then the cassette *amp-ccdB* was integrated into plasmid pBAC1F16 through homologous recombination to yield DH10  $\beta$ /pSC101-*ccdA*/1F16-Nmet-*amp-ccdB*. For mutant verification, a 1.8 kb PCR fragment was amplified using primers: Vnmet-*ccdB*-F and *amp-ccdB*-R, see the resulting fragment in (B); Step 2: the ssDNA oligonucleotides containing target mutation, through Red-ET homologous recombination, the D2104 site was replaced into Q, yielding the mutant DH10  $\beta$ /pSC101-*ccdA*/1F16-NmetD2104Q-*amp-ccdB*, which was verified by colony PCR using Vnmet-*ccdB*-F and VNmetQ2104-R (C); the mutation was further verified by sequencing (E). Using the same strategy, the D2014A mutant (DH10  $\beta$ /pSC101-*ccdA*/1F16-NmetD2104A-*amp-ccdB*) was constructed, with the corresponding colony PCR and sequencing result was shown in panels (D) and (F).

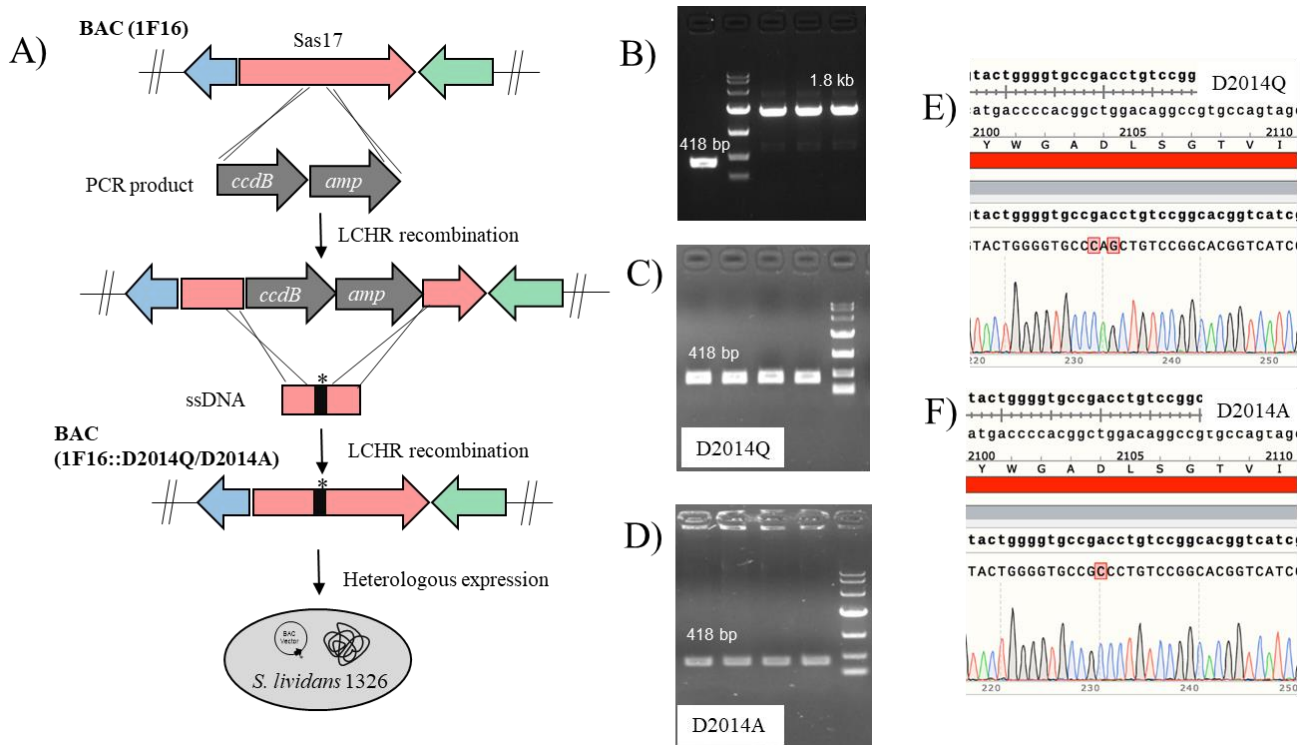

**Figure S10. HRMS analysis of the secondary metabolites from *S. lividans* 1F16 together with those bearing mutations in the Sas17 NMT domain (*S. lividans* 1F16 NmetD2104Q, *S. lividans* 1F16 NmetD2104A); the cell cultures of the mutants were also supplemented with N-methyltyrosine and N-methyltyrosine SNAC. WS9326 production was abolished for both NMT mutants, with recovery of WS9326A production generated by supplementation of these mutant strains with NMe-Tyr SNAC. Upper trace – wild type production of WS9326A; traces #2-3 – D2014Q and D2014A mutants showing a loss of WS9326A production; traces #4-5 mutants supplemented with N-methyltyrosine SNAC showing production of WS9326A; traces #4-5 mutants supplemented with N-methyltyrosine showing no recovery of WS9326A production.**

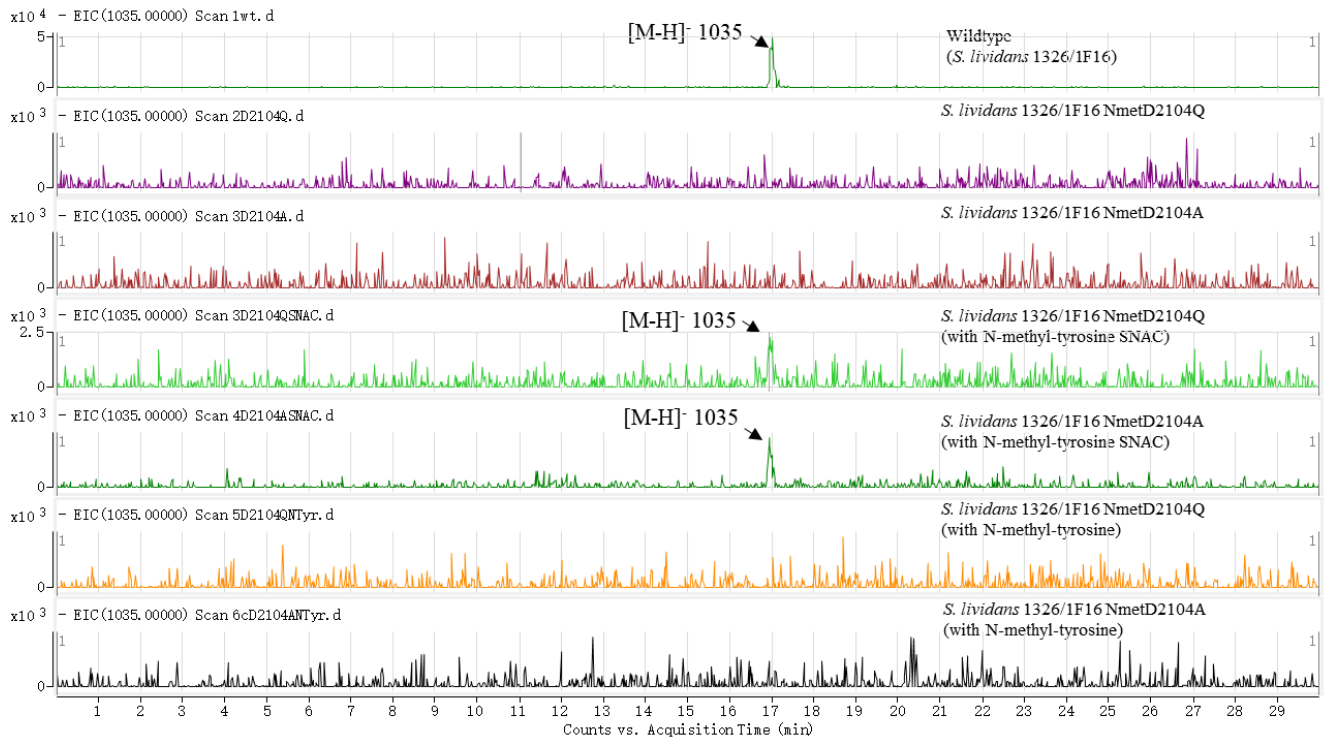

**Figure S11. *In vitro* P450<sub>Sas</sub> binding and turnover assays using dipeptidyl substrates.** (A) LCMS trace of the products of turnover of the cinnamoyl-Val-NMe-Tyr-loaded Sas17 module A-NMt-PCP protein following incubation with P450<sub>Sas</sub> and after methylamine cleavage; only starting material was detected (red), with no evidence of elimination (green) or hydroxylation (purple) of the Tyr residue. (B) CMS trace of the products of turnover of the cinnamoyl-Thr-NMe-Tyr-loaded Sas17 module A-NMt-PCP protein following incubation with P450<sub>Sas</sub> and after methylamine cleavage; only starting material was detected, with no evidence of elimination or hydroxylation of the Tyr residue. (C) Effect of cinnamoyl-Val-NMe-Tyr-loaded Sas17 module A-NMt-PCP protein on the UV/Vis absorption spectrum of P450<sub>Sas</sub>, showing only a decrease of the soret band and no activation (Type I) shift. (D) Effect of cinnamoyl-Thr-NMe-Tyr-loaded Sas17 module A-NMt-PCP protein on the UV/Vis absorption spectrum of P450<sub>Sas</sub>, showing only a decrease of the soret band and no activation (Type I) shift. Results using both Bz-Thr-NMe-Tyr and cinnamoyl-Thr-Tyr loaded Sas17 module A-NMt-PCP protein were the same as for the two substrates in this figure.

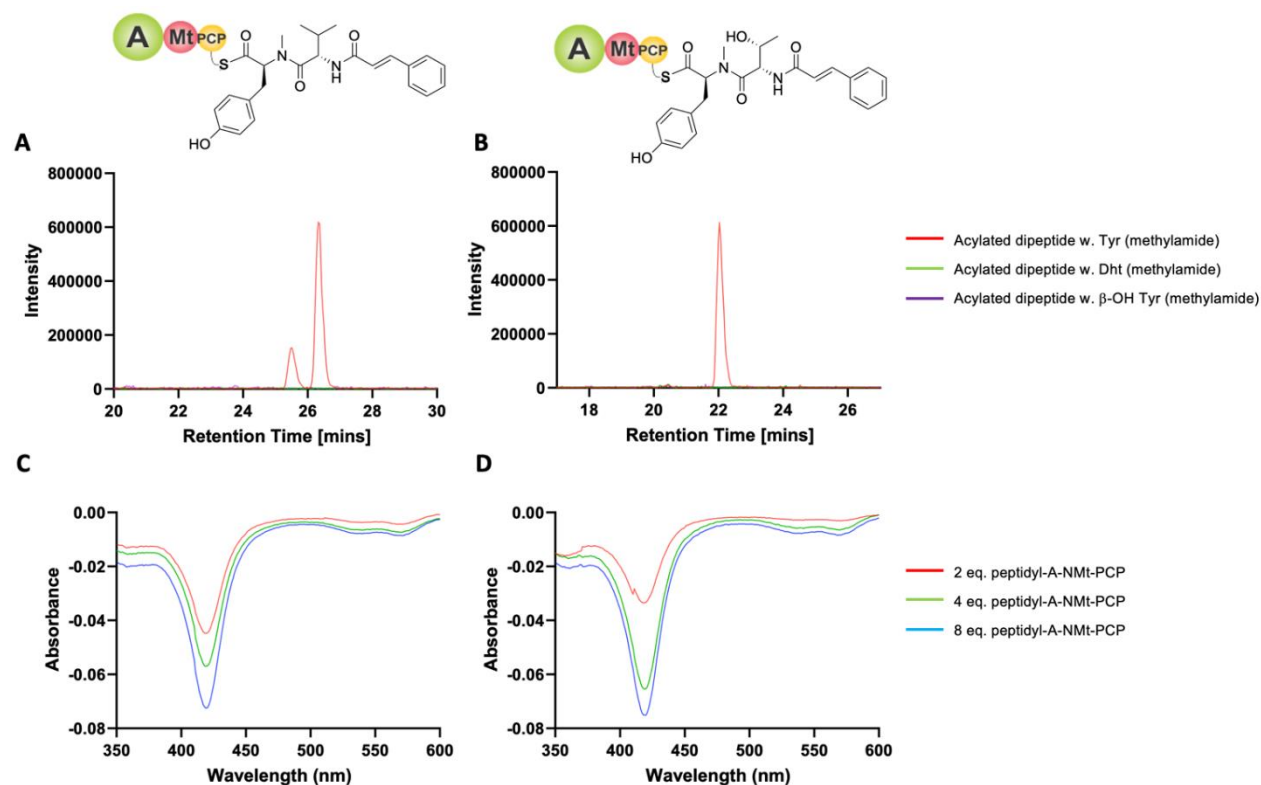

### Figure S12. MS<sup>2</sup> fragmentation analysis of WS9326K.

del3100 WT SG 4d-positive #4823 RT: 15.87 AV: 1 NL: 1.19E6

F: FTMS + c ESI d Full ms2 1055.5072@hcd40.00 [73.0000-1095.0000]

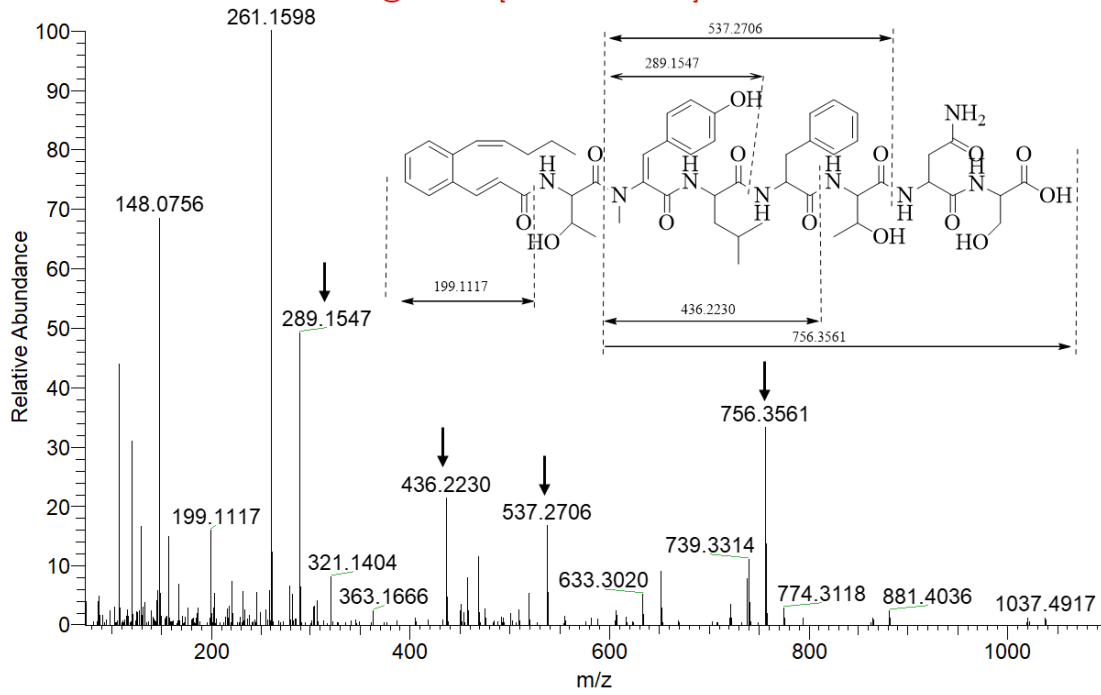

### Figure S13. MS<sup>2</sup> fragmentation analysis of WS9326L.

del3100 sas16[M-H]-1055化合物 #3799 RT: 16.76 AV: 1 NL: 1.13E6

F: FTMS + c ESI d Full ms2 1057.5231@hcd40.00 [73.3333-1100.0000]

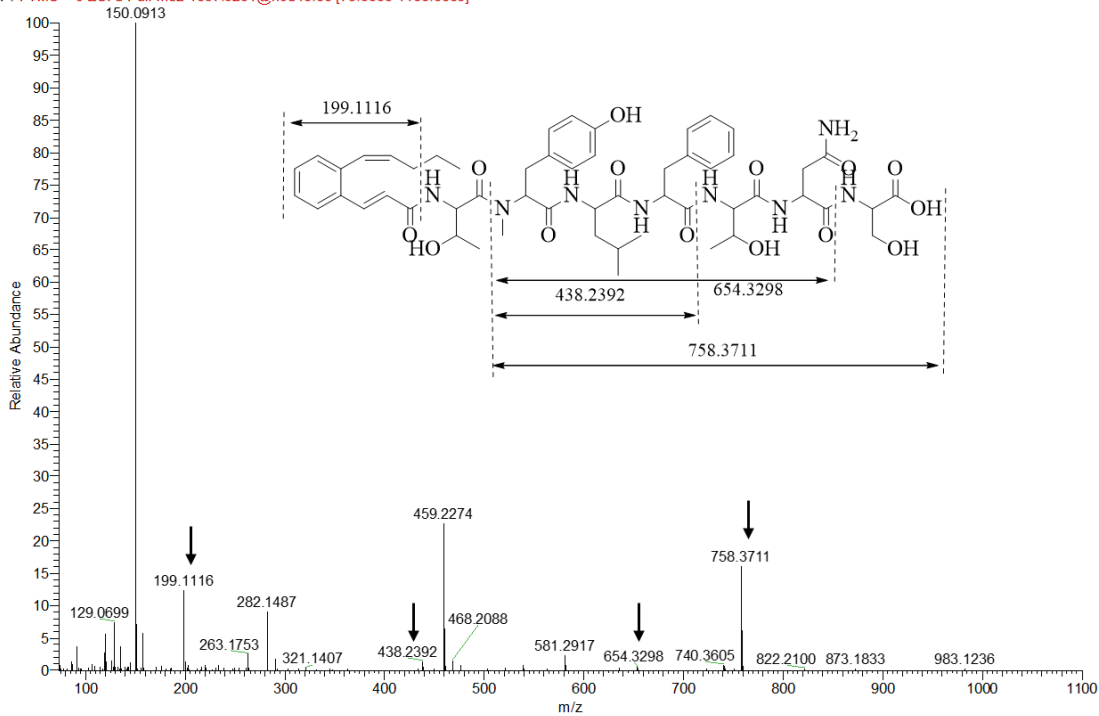

**Figure S14. MS<sup>2</sup> fragmentation analysis of WS9326N.**

del3100 WT SG 4d-positive #5564 RT: 17.63 AV: 1 NL: 1.35E6  
F: FTMS + c ESI d Full ms2 842.4332@hcd40.00 [58.6667-880.0000]

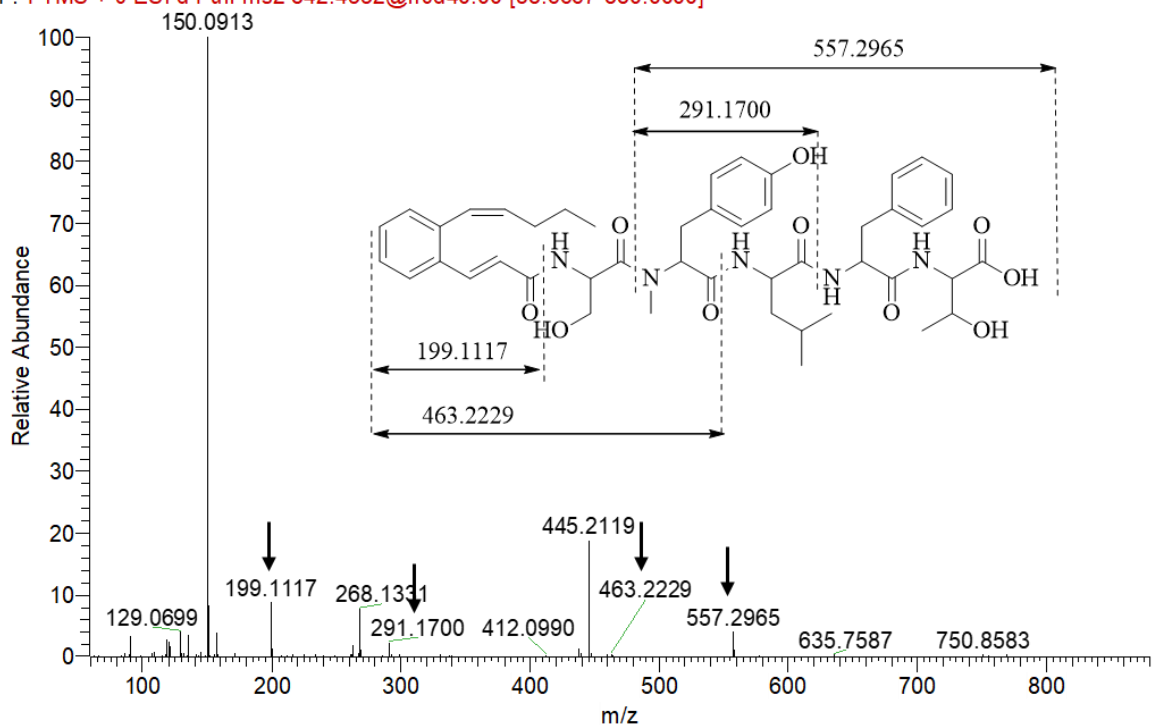

**Figure S15. MS<sup>2</sup> fragmentation analysis of WS9326M.**

del3100 WT SG 4d-positive #5727 RT: 18.02 AV: 1 NL: 1.88E6  
F: FTMS + c ESI d Full ms2 856.4489@hcd40.00 [59.6667-895.0000]

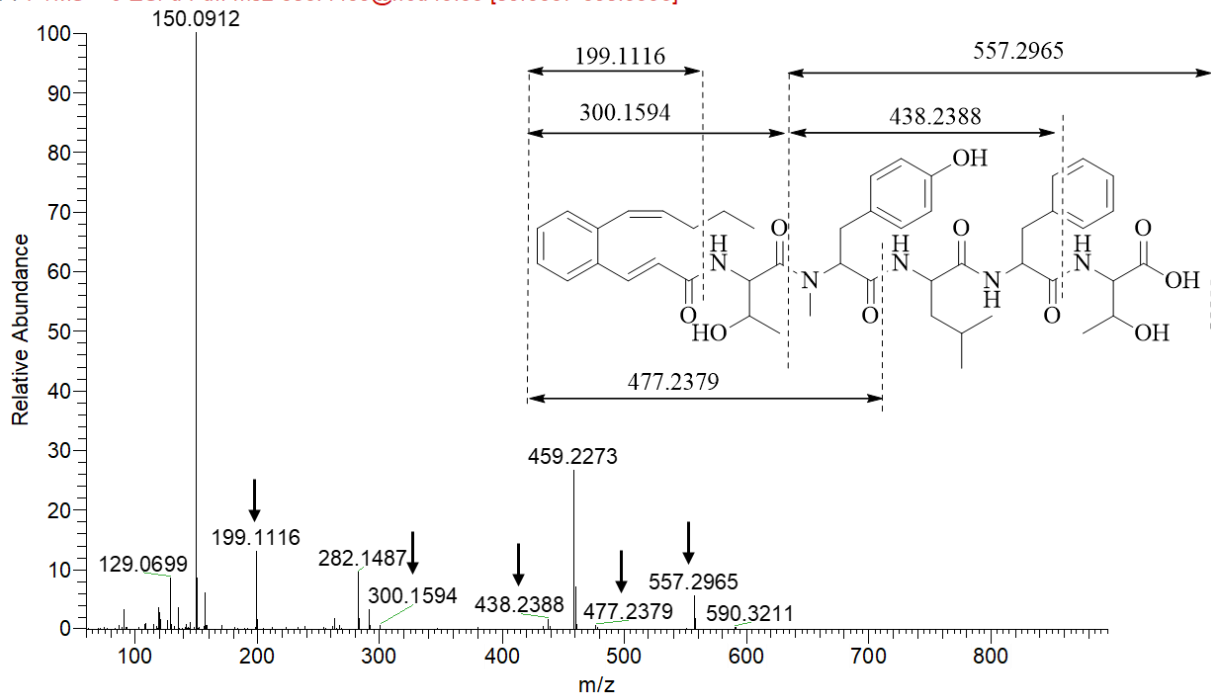

# Figure S16. MS<sup>2</sup> fragmentation analysis of WS9326O.

del3100 sas16 sg 5d-positive #4741 RT: 16.13 AV: 1 NL: 1.87E5  
F: FTMS + c ESI d Full ms2 495.2491@hcd40.00 [50.0000-525.0000]

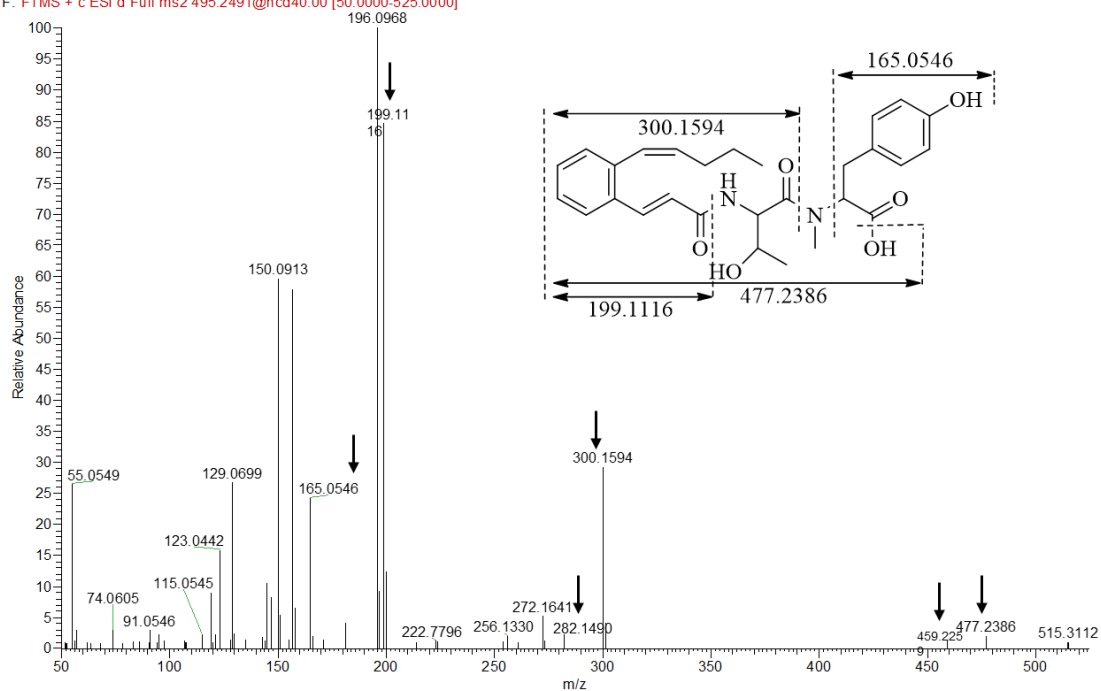

Figure S17. LCMS analysis of Tyr-CoA.

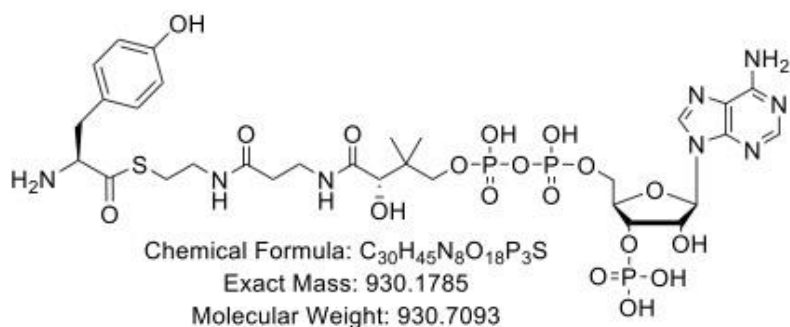

<Chromatogram>  
mV

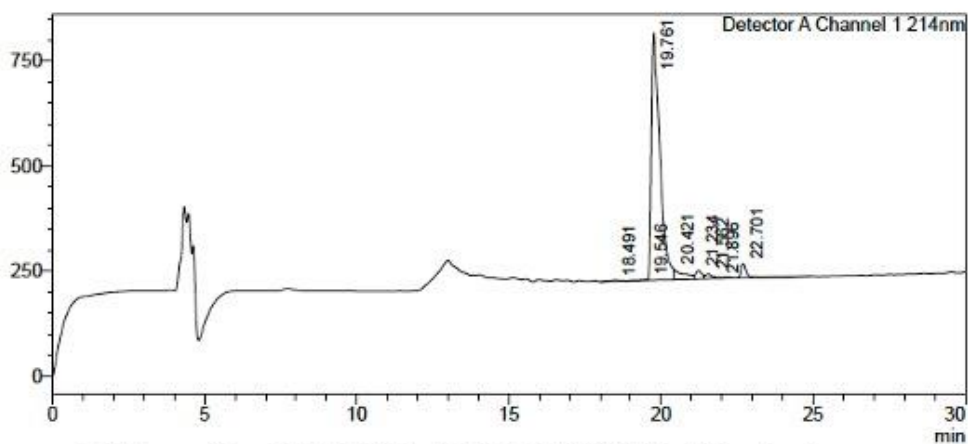

LCMS gradient 10-40% in ACN (0.1% TFA) in 30 minutes  
RT = 19.76min

<Spectrum>

Line# 1 R.Time: 20.000(Scan#: 1201)  
MassPeaks: 1064  
RawMode: Single 20.000(1201) BasePeak: 466.3(9312281)  
BG Mode: None Segment 1 - Event 1

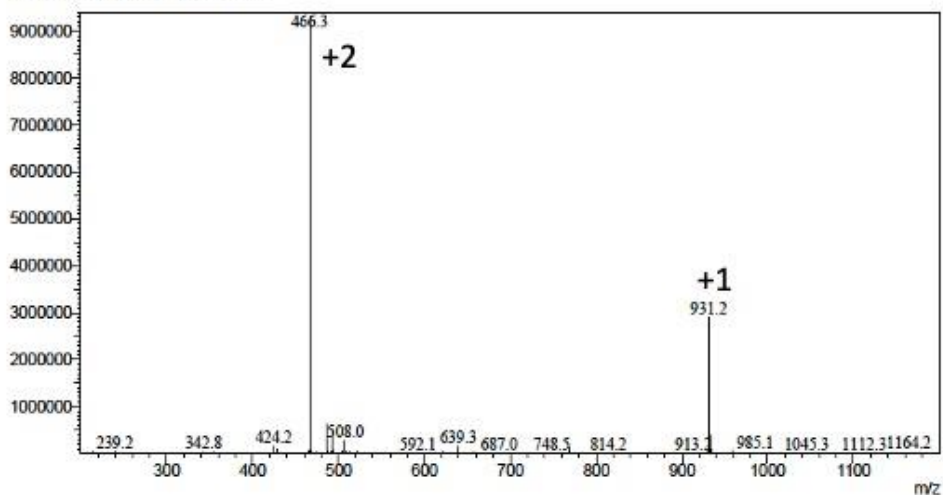

$[M + H]^+ = 931.2\text{Da}$ ;  $MW_{\text{exp}} = 930.2\text{Da}$ ;  $MW_{\text{Expected}} = 930.2\text{Da}$

Figure S18. LCMS analysis of NMe-Tyr-CoA.

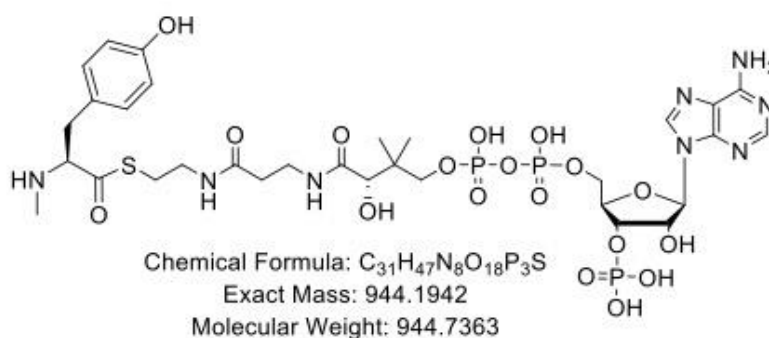

<Chromatogram>  
mV

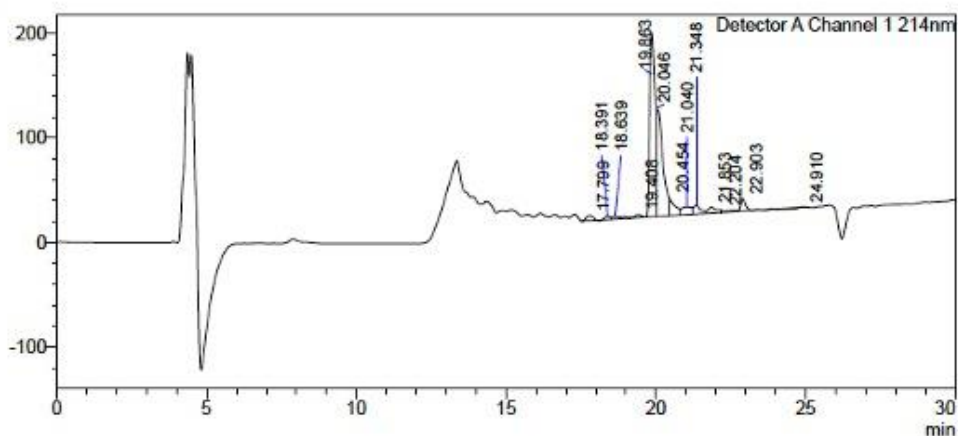

LCMS gradient 10-40% in ACN (0.1% TFA) in 30 minutes  
RT = 19.86min

<Spectrum>

Line#: 1 R.Time: 20.033(Scan#: 1203)  
MassPeaks: 1083  
RawMode: Single 20.033(1203) BasePeak: 473.3(6433437)  
BG Mode: None Segment 1 - Event 1

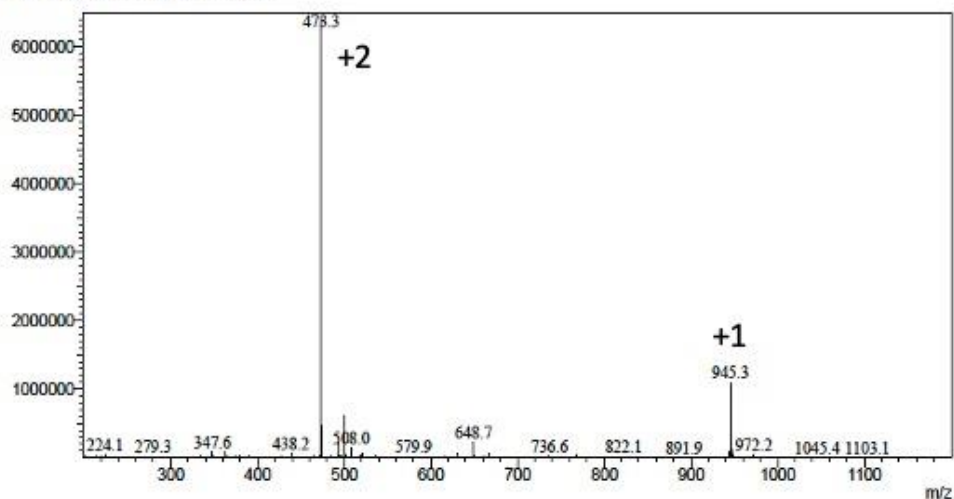

$[M + H]^+ = 945.3\text{Da}$ ;  $MW_{\text{exp}} = 944.3\text{Da}$ ;  $MW_{\text{Expected}} = 944.2\text{Da}$



Figure S19. LCMS analysis of Cinnamoyl-Thr-Tyr-CoA.

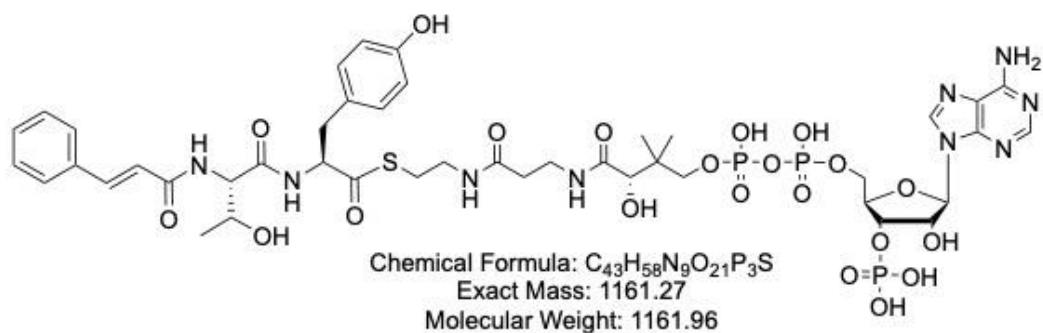

<Chromatogram>

mV

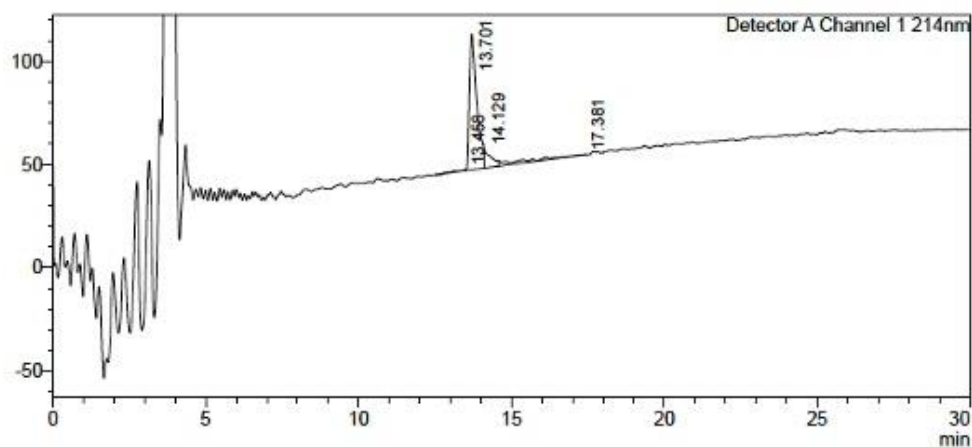

LCMS gradient 10-70% in ACN (0.1% TFA) in 30 minutes

RT = 13.46 min

<Spectrum>

Line#:1 R.Time:13.867(Scan#:833)  
MassPeaks:1068  
RawMode:Single 13.867(833) BasePeak:582.0(394003)  
BG Mode:None Segment 1 - Event 1

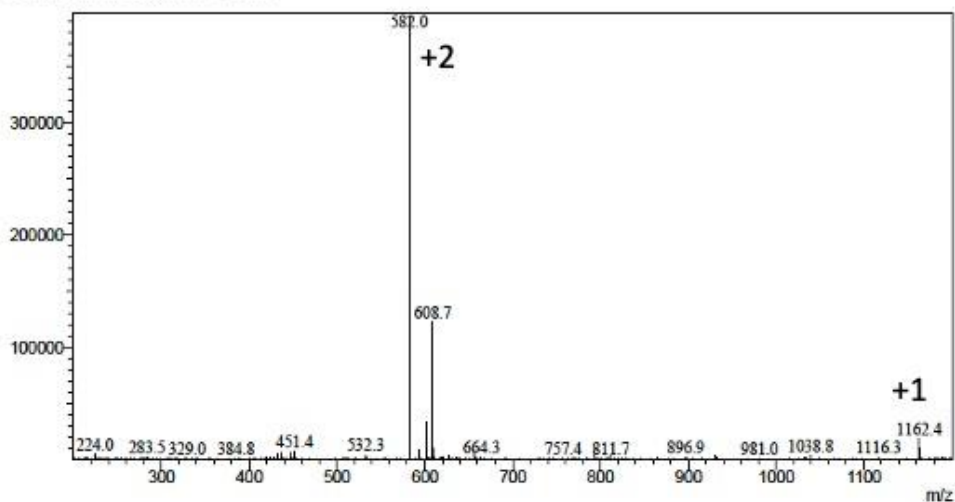

$[M + H]^+ = 1162.4\text{Da}$ ;  $MW_{\text{exp}} = 1161.4\text{Da}$ ;  $MW_{\text{Expected}} = 1161.3\text{Da}$

Figure S20. LCMS analysis of Cinnamoyl-Thr-NMe-Tyr-CoA.

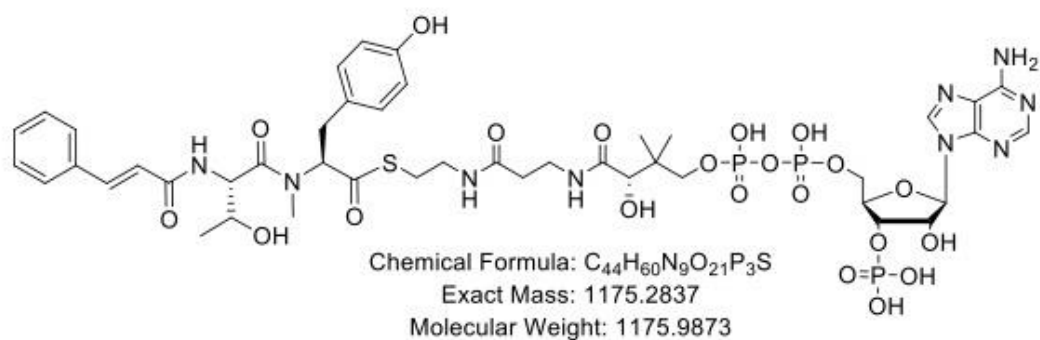

<Chromatogram>

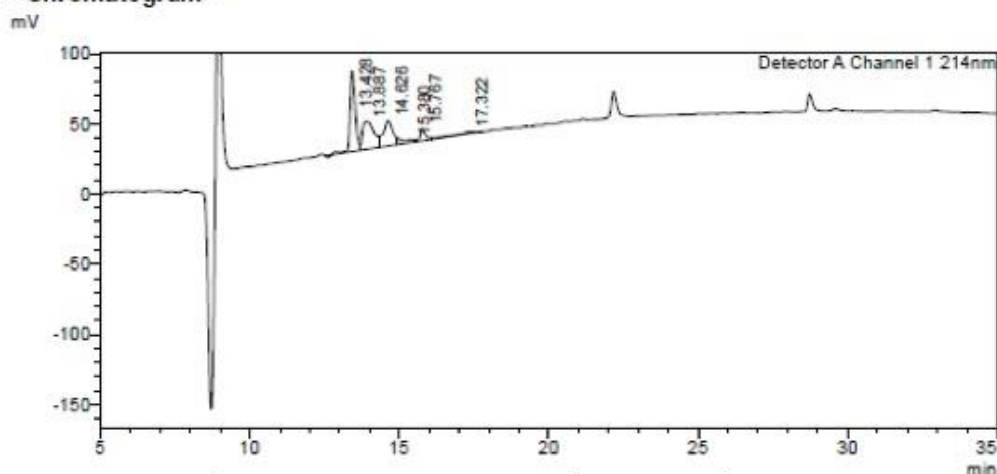

LCMS gradient 10-100% in ACN (0.1% TFA) in 30 minutes

RT =

<Spectrum>

Line#: 1 R.Time: 13.967(Scan#: 839)  
MassPeaks: 1859  
RawMode: Single 13.967(839) BasePeak: 588.8(54451)  
B/G Mode: None Segment 1 - Event 1

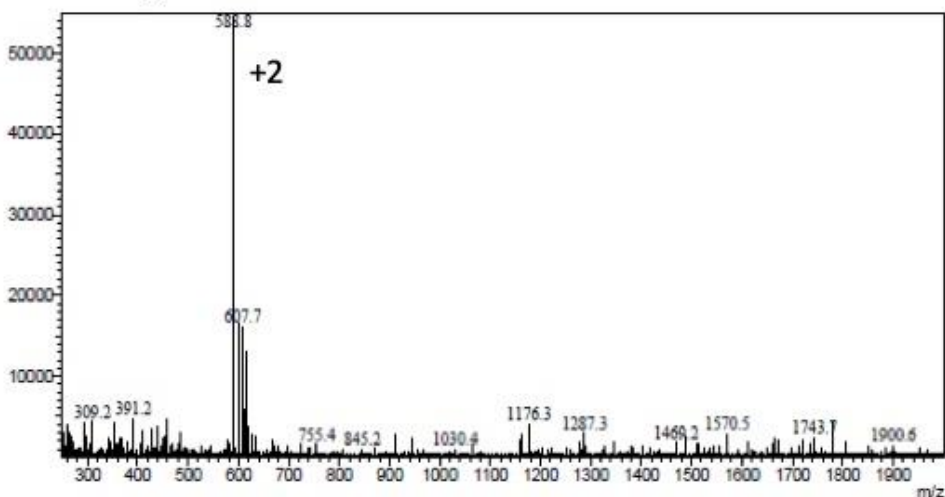

$[M + 2H^+]^{2+} = 588.8\text{Da}$ ;  $MW_{\text{exp}} = 1175.6\text{Da}$ ;  $MW_{\text{Expected}} = 1175.3\text{Da}$

Figure S21. LCMS analysis of Cinnamoyl-Val-NMe-Tyr-CoA.

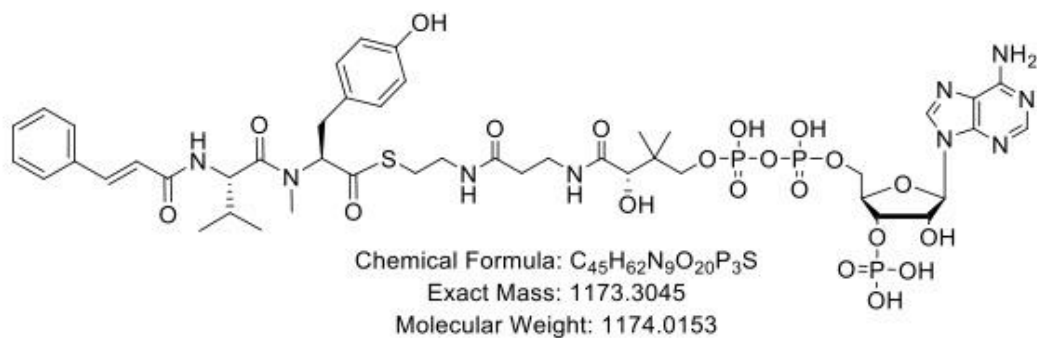

<Chromatogram>

mV

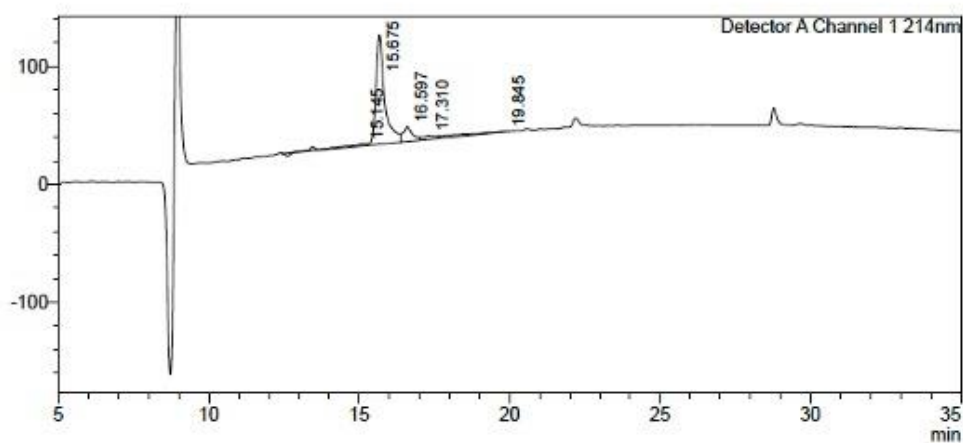

LCMS gradient 10-100% in ACN (0.1% TFA) in 30 minutes

RT = 13.4min

<Spectrum>

Line# 1 R.Time: 15.833(Scan#:951)  
MassPeaks: 785  
RawMode: Single 15.833(951) BasePeak: 587.9(195635)  
BG Mode: None Segment 1 - Event 1

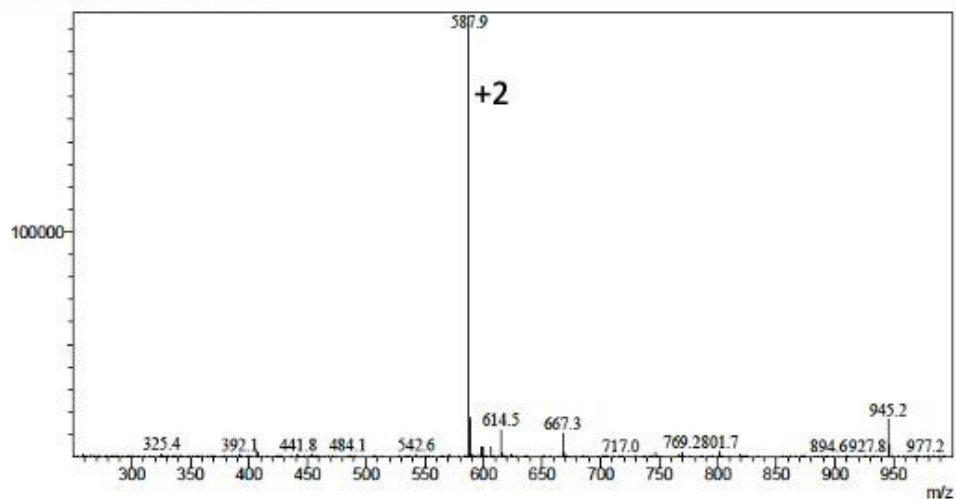

$[M + 2H]^+ = 587.9\text{Da}$ ;  $MW_{\text{exp}} = 1173.8\text{Da}$ ;  $MW_{\text{Expected}} = 1173.3\text{Da}$

Figure S22. LCMS analysis of Benzyl-Thr-NMe-Tyr-CoA.

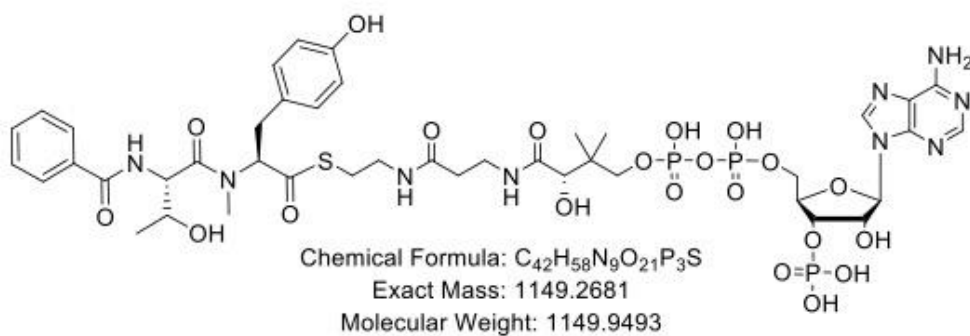

<Chromatogram>

mV

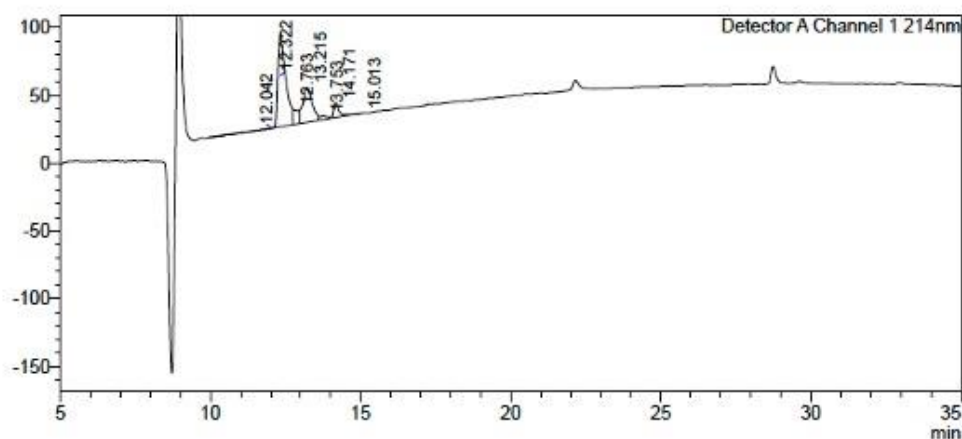

LCMS gradient 10-100% in ACN (0.1% TFA) in 30 minutes

RT = 12.32min

<Spectrum>

Line# 1 R.Time:12.467(Scan#:749)  
MassPeaks:1867  
RawMode:Single 12.467(749) BasePeak:576.0(160371)  
BG Mode:None Segment 1 - Event 1

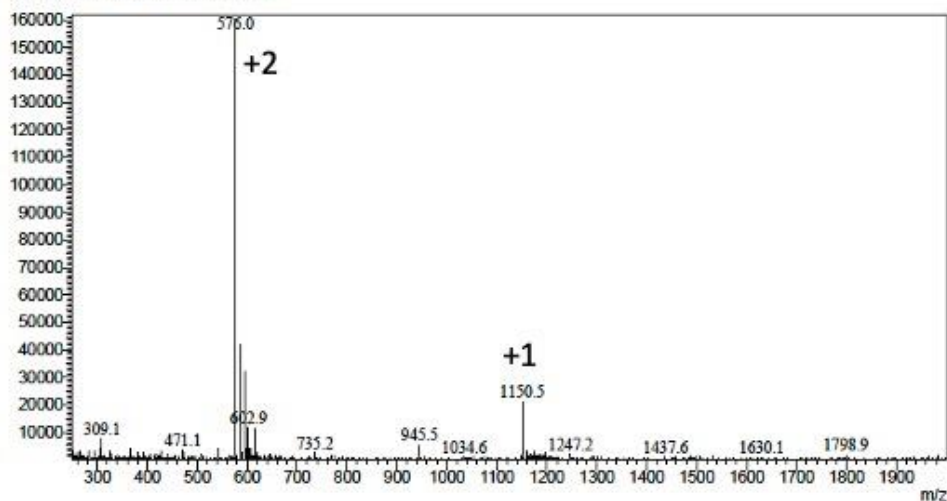

$[M + H]^+ = 1150.5\text{Da}$ ;  $MW_{\text{exp}} = 1149.5\text{Da}$ ;  $MW_{\text{Expected}} = 1149.3\text{Da}$

Figure S23. HRMS and MS<sup>2</sup> analysis of Cinnamoyl-Thr-NMe-Tyr-NMe.

HF1RS20210525\_TT\_TO\_3 #24849 RT: 51.89 AV: 1 NL: 8.19E8  
T: FTMS + p NSI Full ms [300.0000-1000.0000]

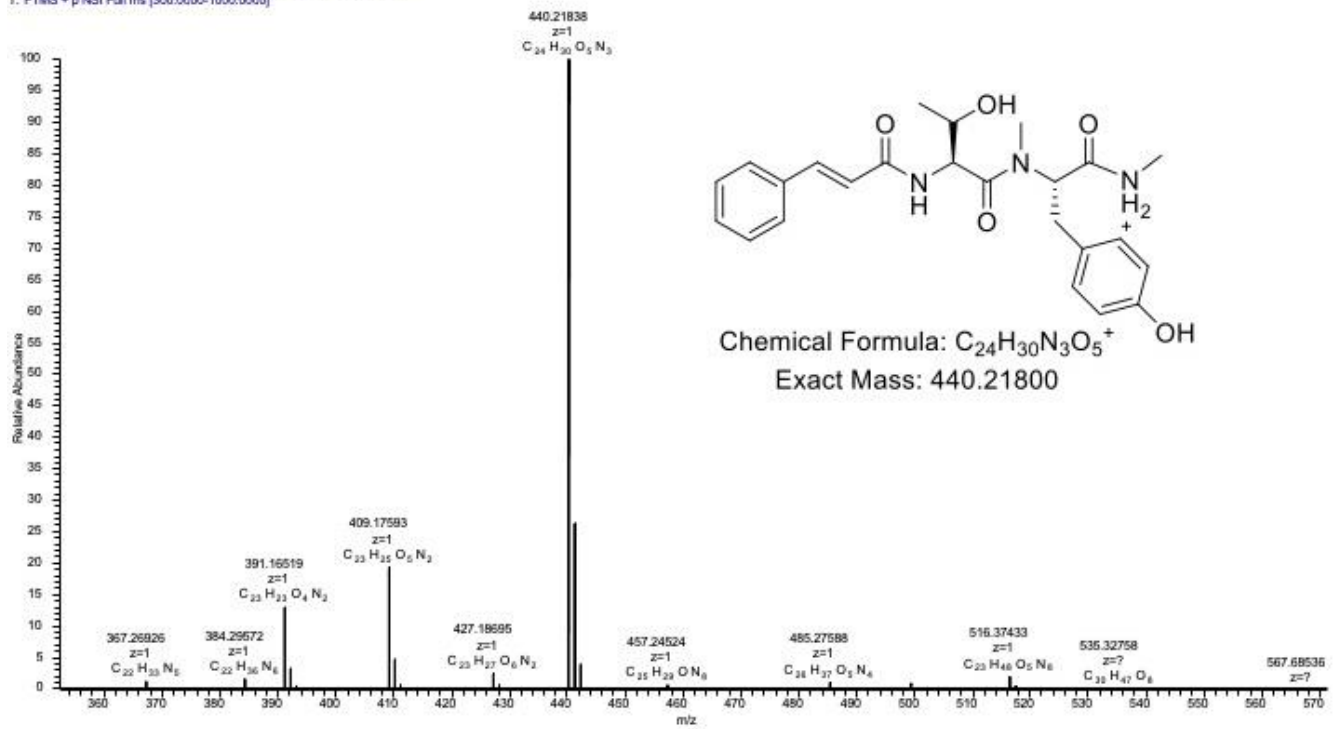

HF1RS20210525\_TT\_TO\_3 #24831 RT: 51.85 AV: 1 NL: 9.20E7  
F: FTMS + p NSI Full ms2:440.21803@hcd24.00 [60.0000-465.0000]

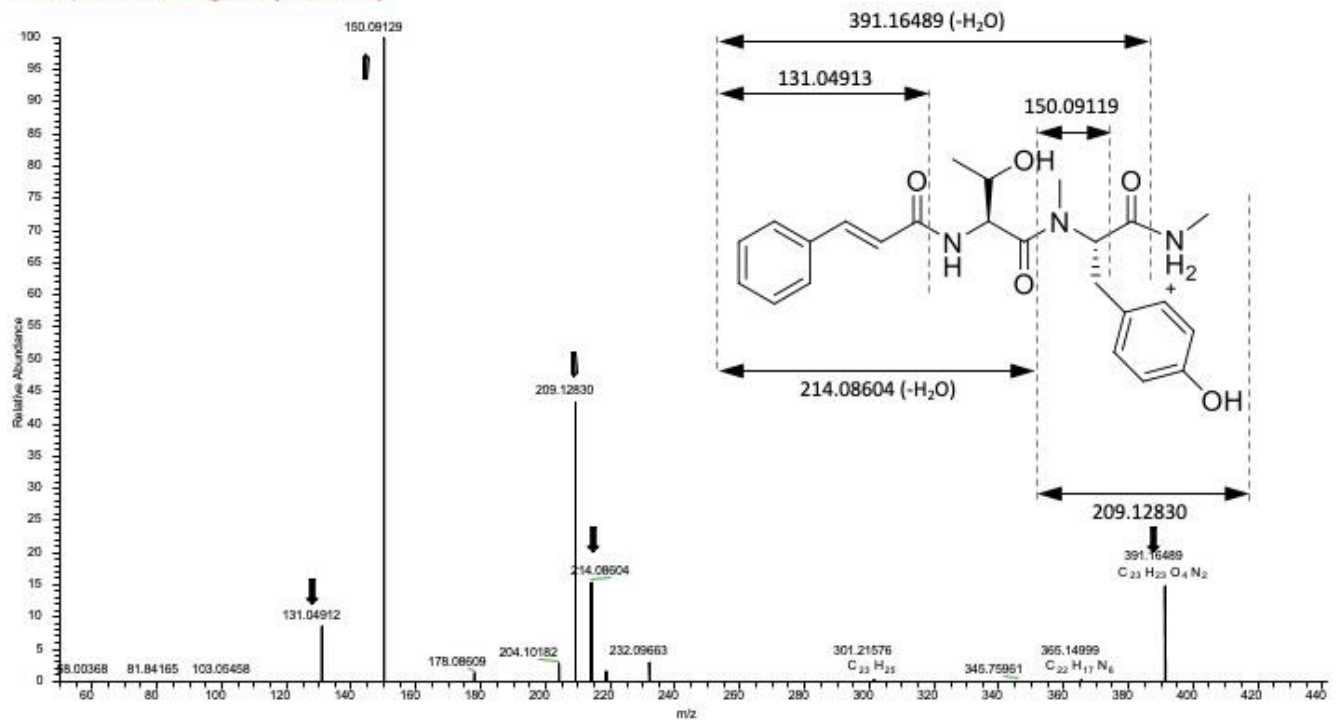

Figure S24. HRMS and MS<sup>2</sup> analysis of Cinnamoyl-Val-NMe-Tyr-NMe.

HF1RS20210525\_TV\_TO\_3 #25409 RT: 53.35 AV: 1 NL: 4.65E8  
 T: FTMS + p NSI Full ms [300.0000-1000.0000]

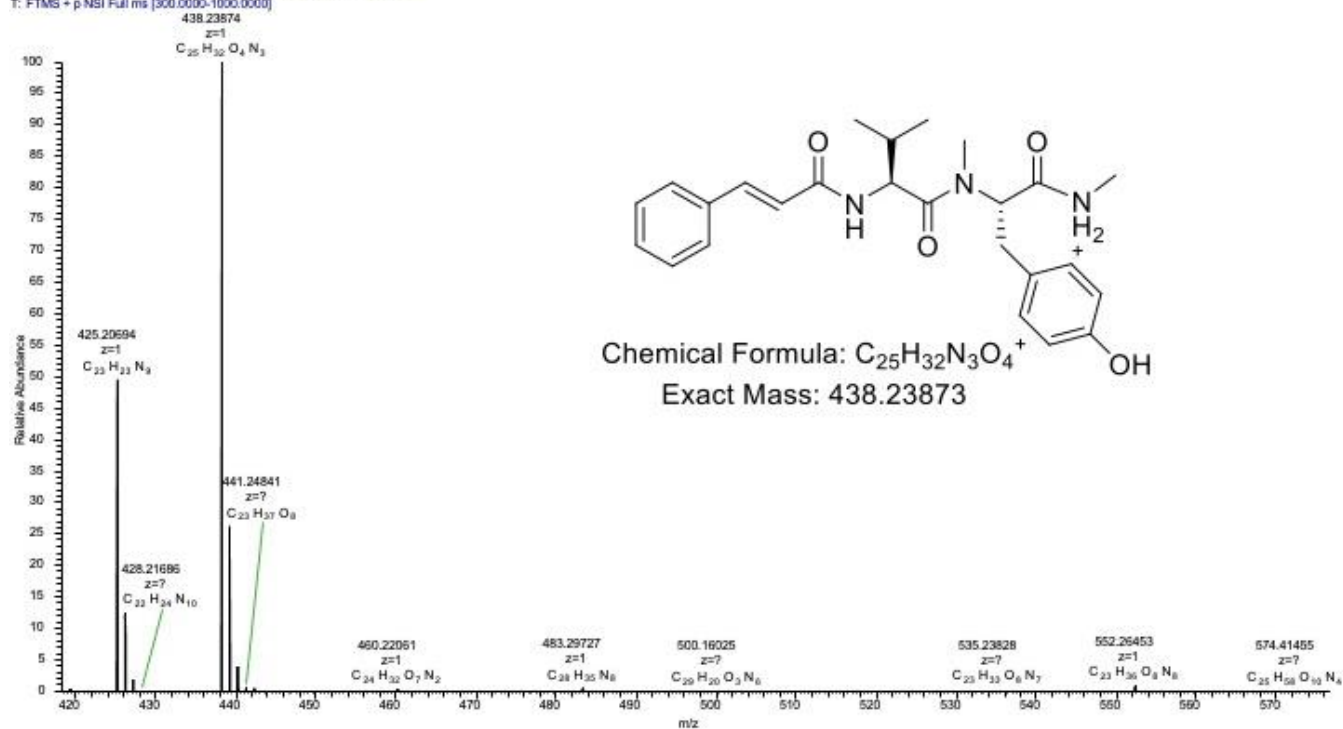

HF1RS20210525\_TV\_TO\_3 #25511 RT: 53.53 AV: 1 NL: 4.32E7  
 F: FTMS + p NSI Full ms2 438.23874@hd024.00 [50.0000-465.0000]

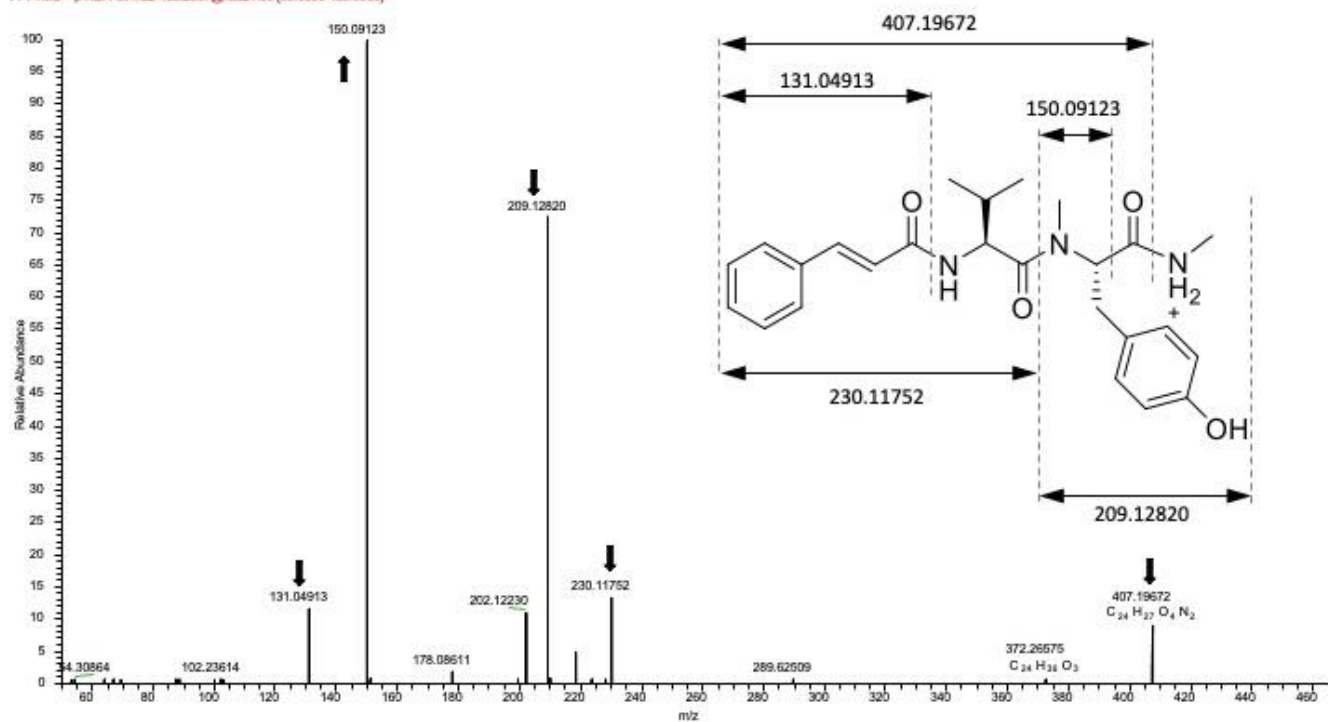



Figure S25. HRMS and MS<sup>2</sup> analysis of Cinnamoyl-Thr-Tyr-NMe.

F1RS20210806\_SAS\_Ti\_MA #9021 RT: 51.94 AV: 1 NL: 6.84E8  
T: FTMS + p NSI Full ms [300.0000-1800.0000]

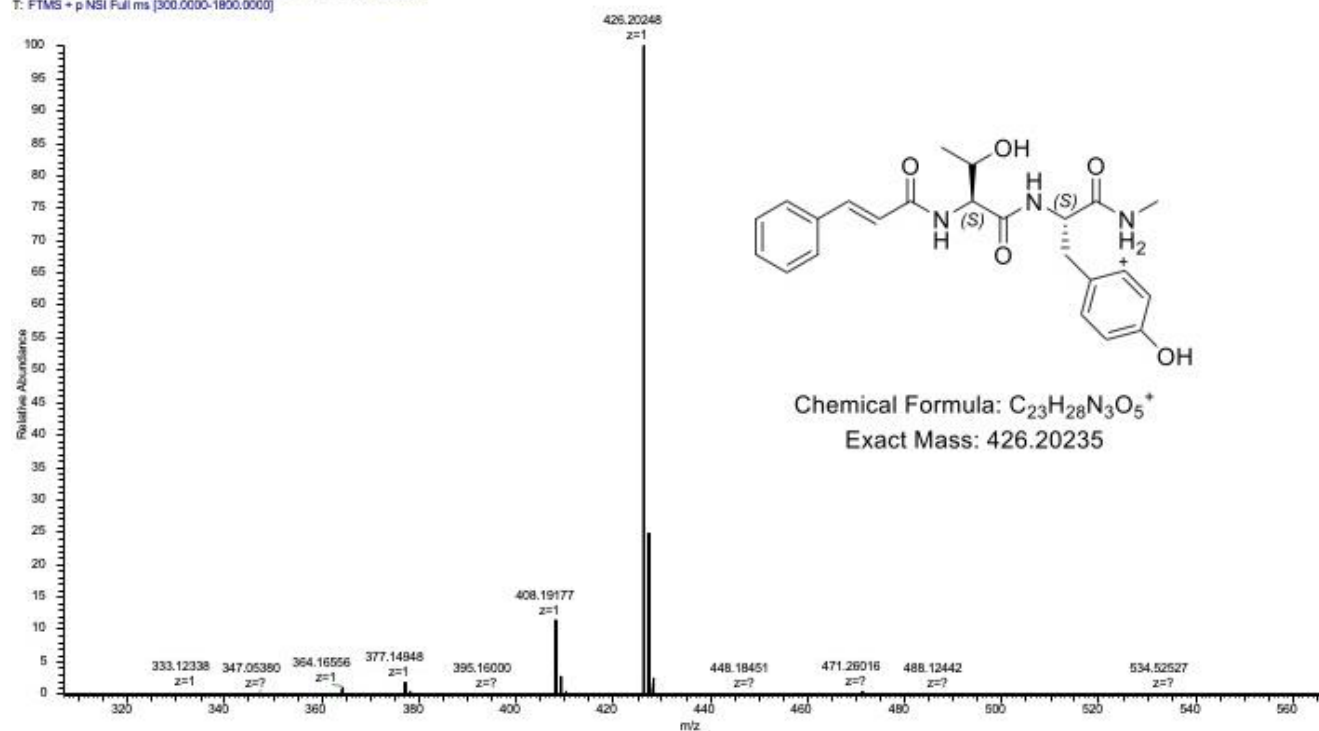

F1RS20210806\_SAS\_Ti\_MA #9013 RT: 51.92 AV: 1 NL: 1.63E8  
T: FTMS + p NSI Full ms2 426.2024[hcd426.00 [100.0000-437.0000]]

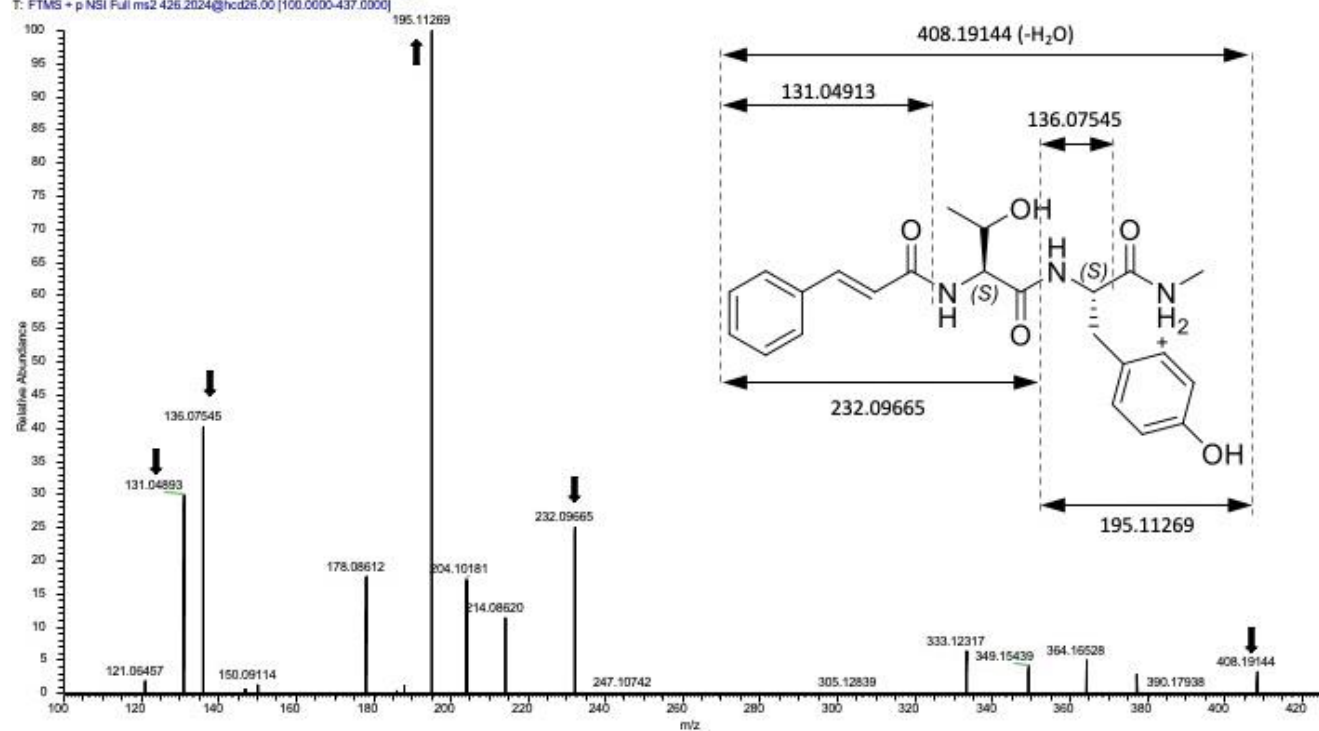

Figure S26. HRMS and MS<sup>2</sup> analysis of Benzyl-Thr-NMe-Tyr-NMe.

HF1RS20210525\_BT\_TO\_3 #23657 RT: 48.92 AV: 1 NL: 2.68E8  
T: FTMS + p NSI Full ms [300.0000-1000.0000]

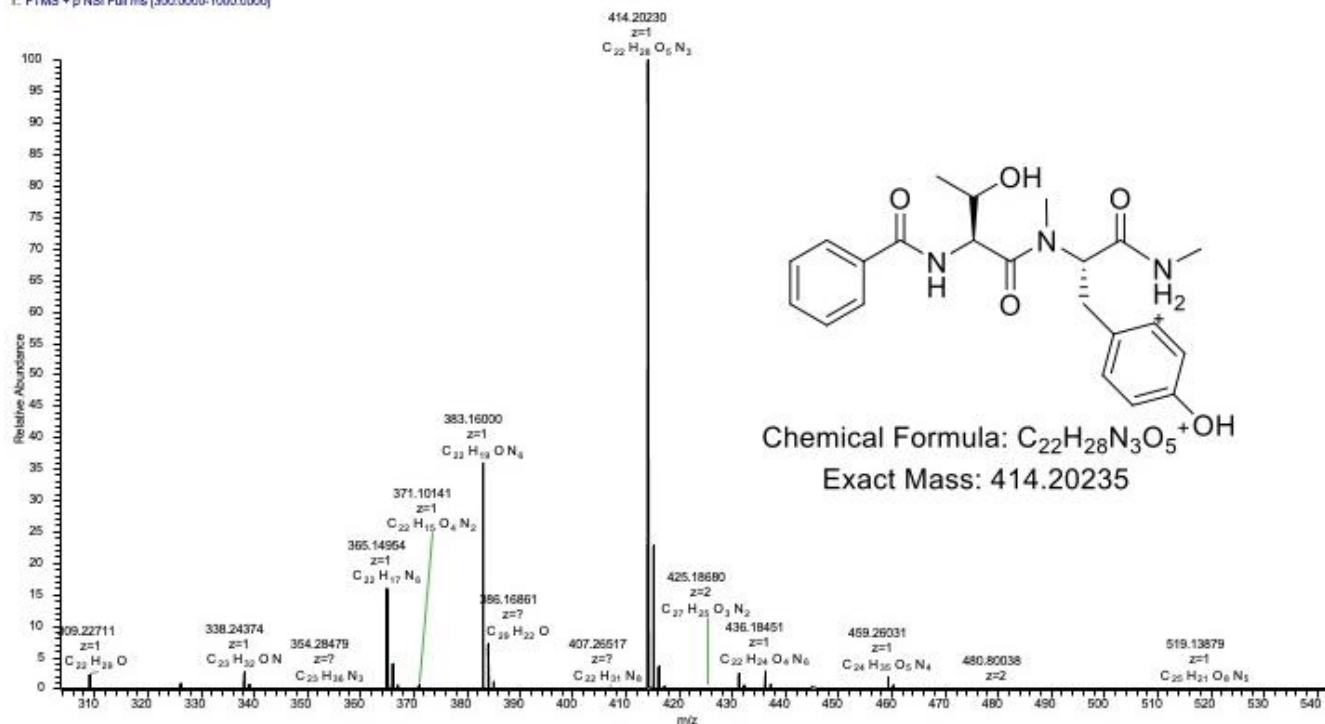

HF1RS20210525\_BT\_TO\_3 #23436 RT: 48.50 AV: 1 NL: 1.74E9  
F: FTMS + p NSI Full ms2 414.2024@hz024.00 [60.0000-440.0000]

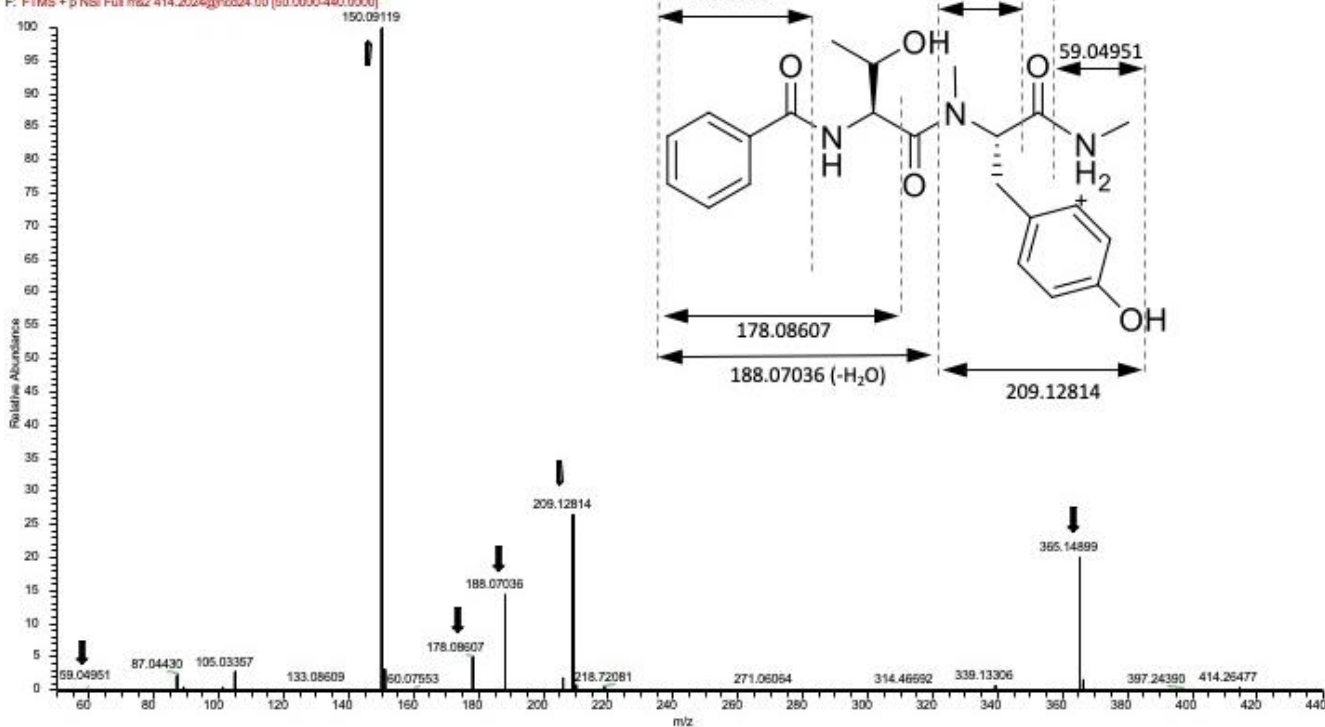



**Figure S27. Putative peptide intermediate species captured in the biosynthesis of WS9326A by a tyrosine-based chain termination probe.**

**Dipeptide**

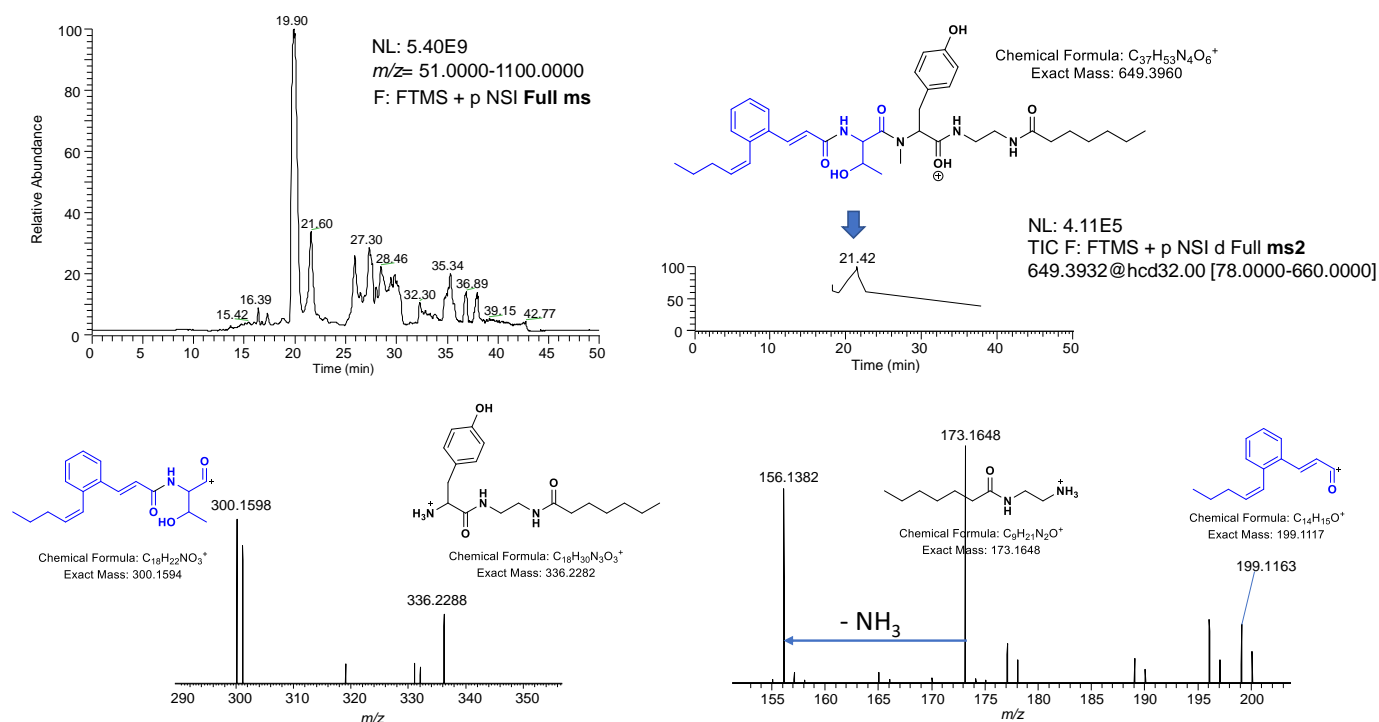

From top left, clockwise: TIC, HR- MS<sup>2</sup> and diagnostic fragments of *m/z* 649 dipeptide from extract analysis. In blue are the off-loaded biosynthetic species.

**Unsaturated Dipeptide**

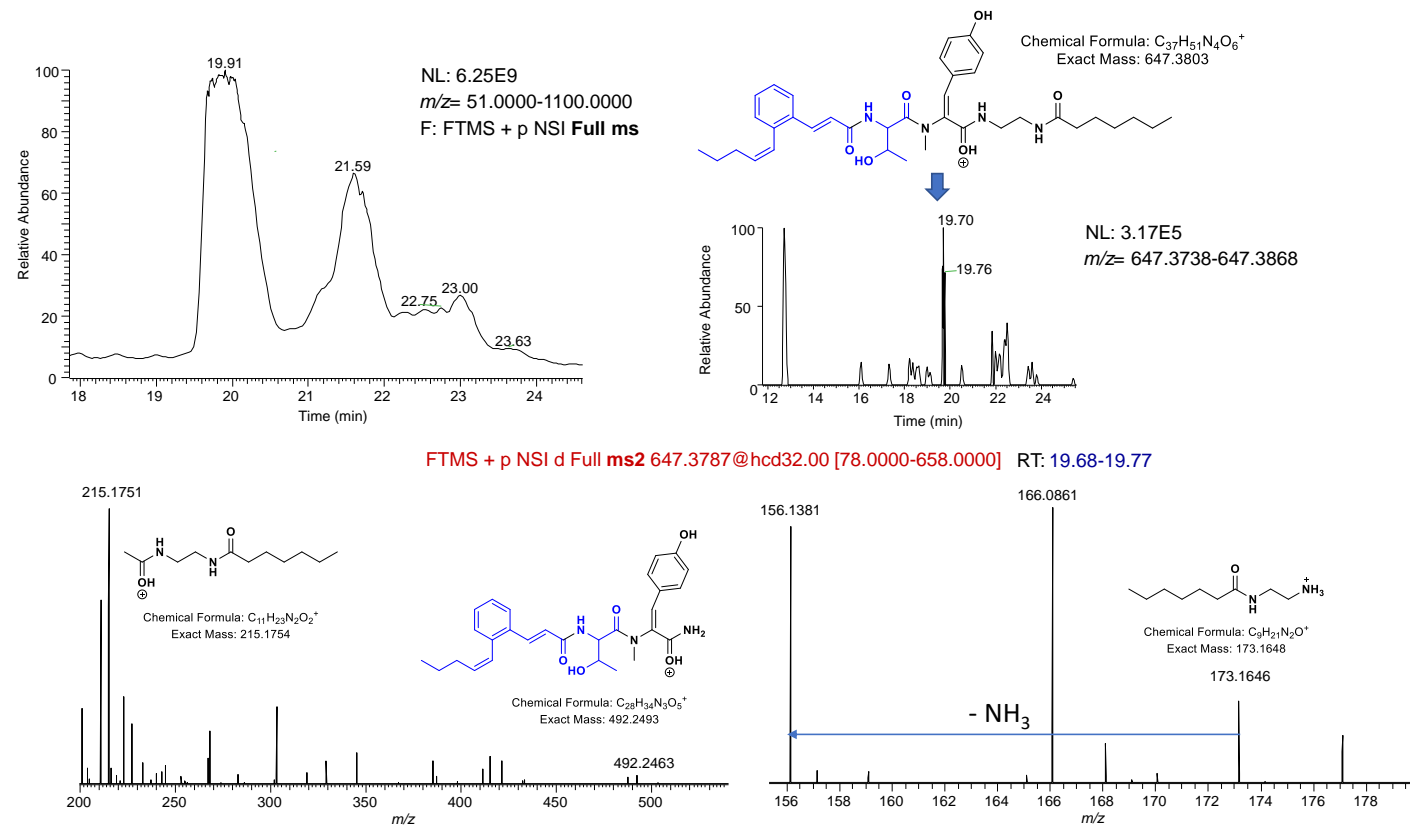

From top left, clockwise: TIC, EIC and diagnostic MS<sup>2</sup> fragments of *m/z* 647 dipeptide from extract analysis.

## Tetrapeptide

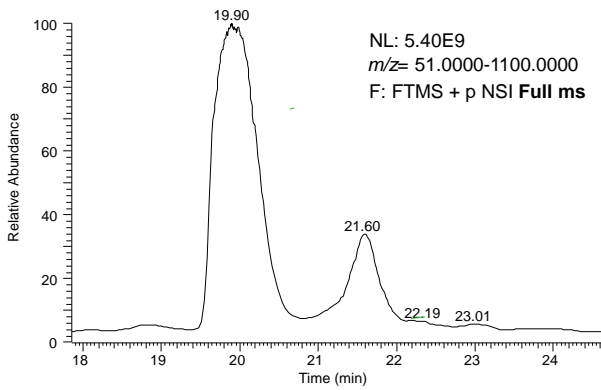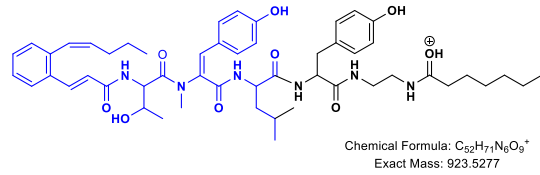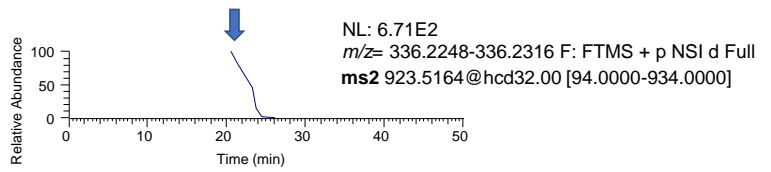

FTMS + p NSI d Full ms2 923.5164@hcd32.00 [94.0000-934.0000]

RT: 20.53  
 NL: 2.88 E3

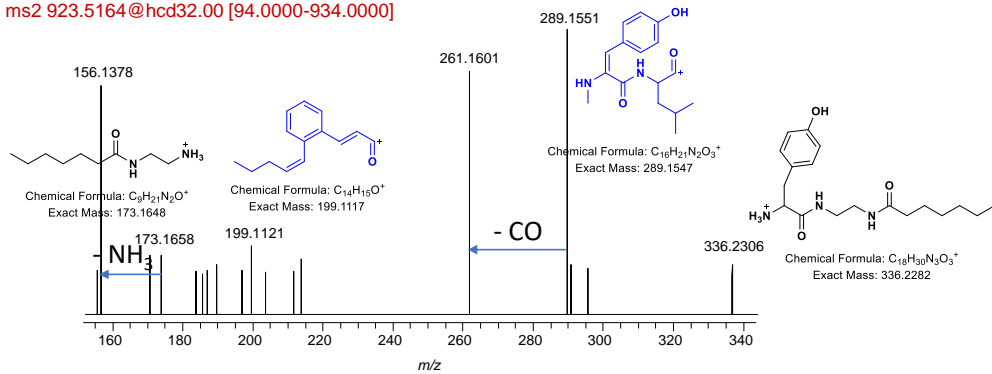

From top left, clockwise: TIC, HR-MS<sup>2</sup> detection and fragments of  $m/z$  923 tetrapeptide from extract analysis.

## Pentapeptide

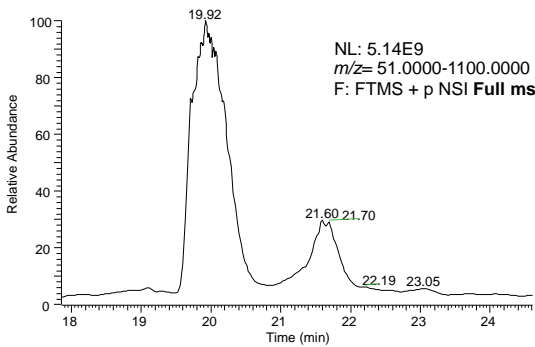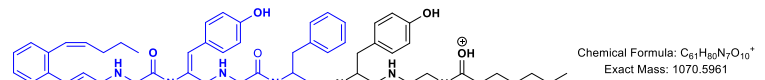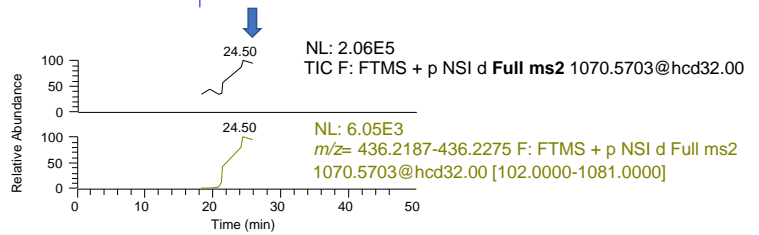

FTMS + p NSI d Full ms2 1070.5703@hcd32.00 [102.0000-1081.0000]

NL: 2.17E4

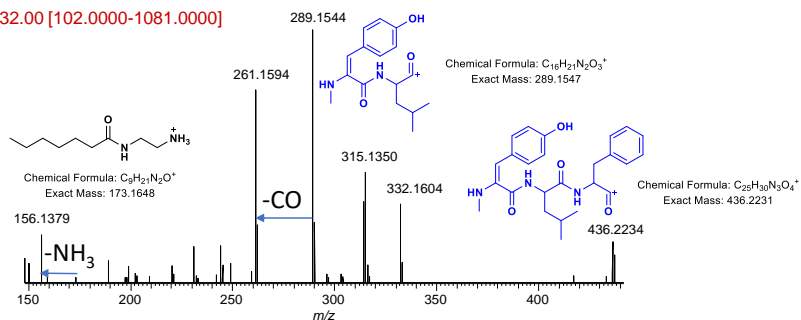

From top left, clockwise: TIC, HR-MS<sup>2</sup> detection and fragments of  $m/z$  1070 pentapeptide from extract analysis.

## Hexapeptide

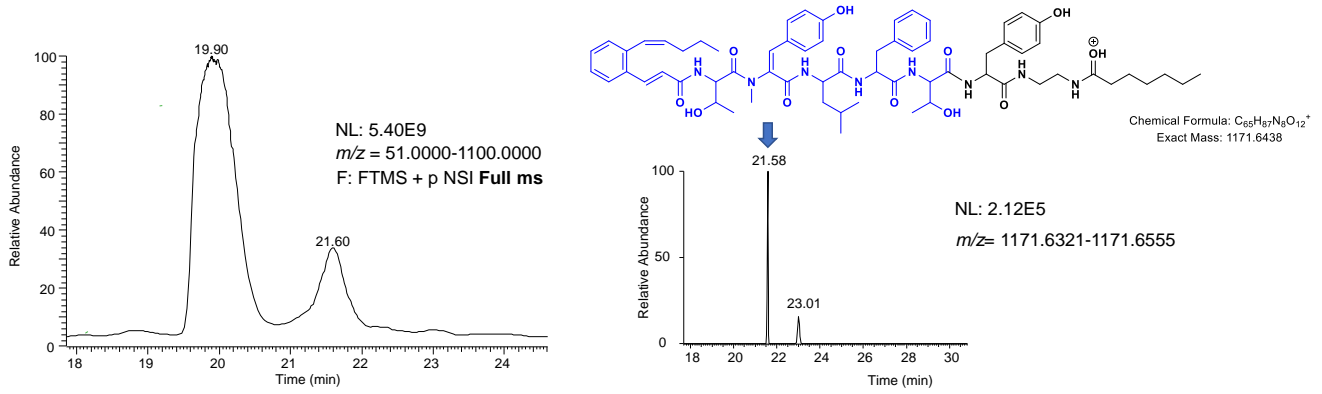

FTMS + p NSI d Full ms2 1171.6439@hcd32.00 [108.0000-1182.0000]

NL: 2.30E4

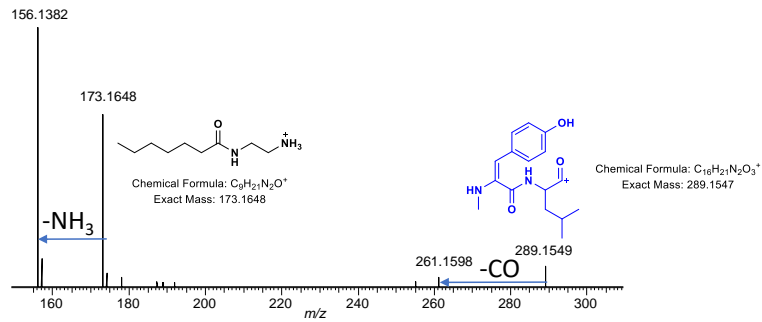

From top left, clockwise: TIC, EIC and HR-MS<sup>2</sup> fragments of  $m/z$  1170 hexapeptide from extract analysis.

## Methylation of tyrosine-based chain termination probe

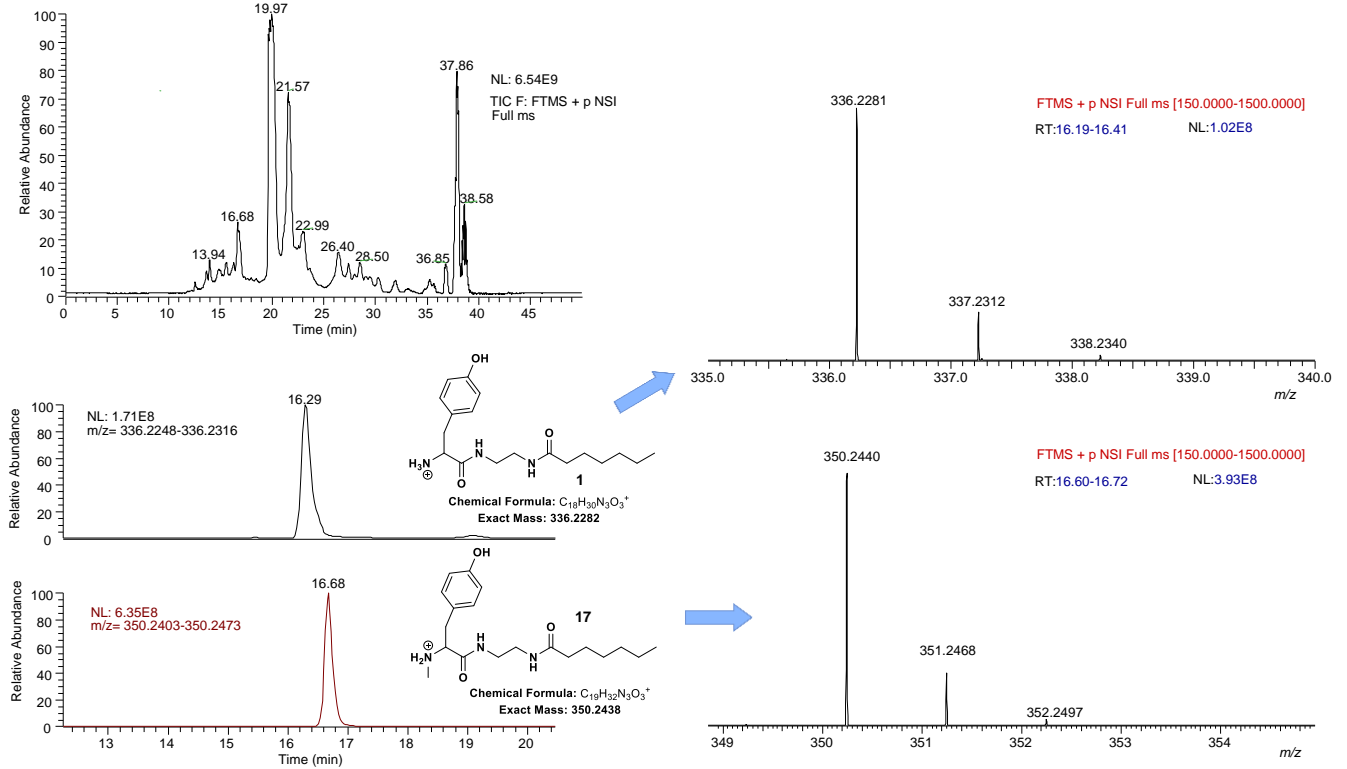

Left: TIC (top) and EICs (bottom) for probe 1 ( $[M+H]^+$ ) and its methylated form (17, ( $[M+H]^+$ ), found in the organic extracts of *S. asterosporus* strains supplemented with 1 over 5 days. Right: HR-MS analysis of 1 (top) and 17 (bottom).

**Figure S28. Putative peptide intermediate species captured in the biosynthesis of WS9326A by a  $\beta$ -alanine based chain termination probe.**

**Dipeptide**

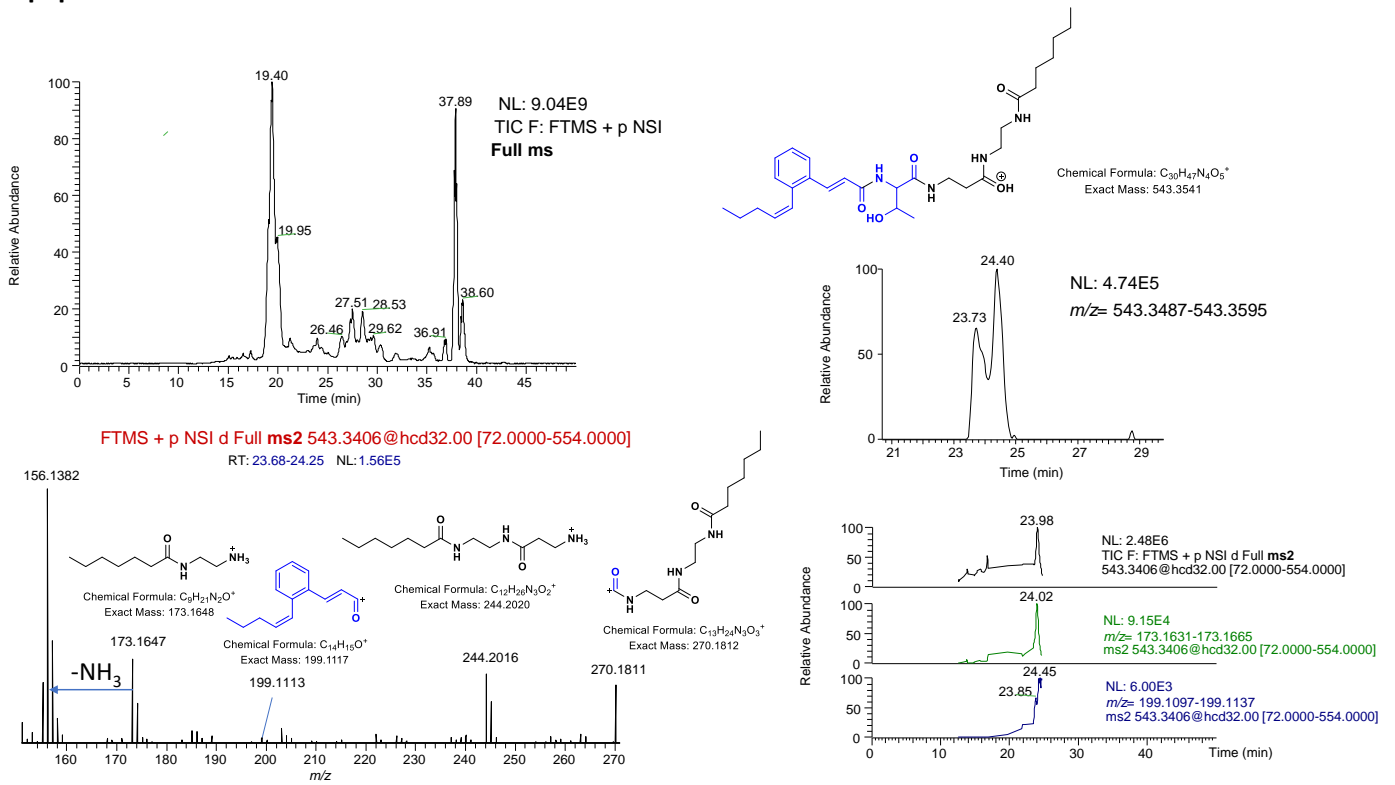

From top left, clockwise: TIC, EIC, HR-MS<sup>2</sup> detection and fragments of  $m/z$  543 dipeptide from extract analysis.

**Tripeptide**

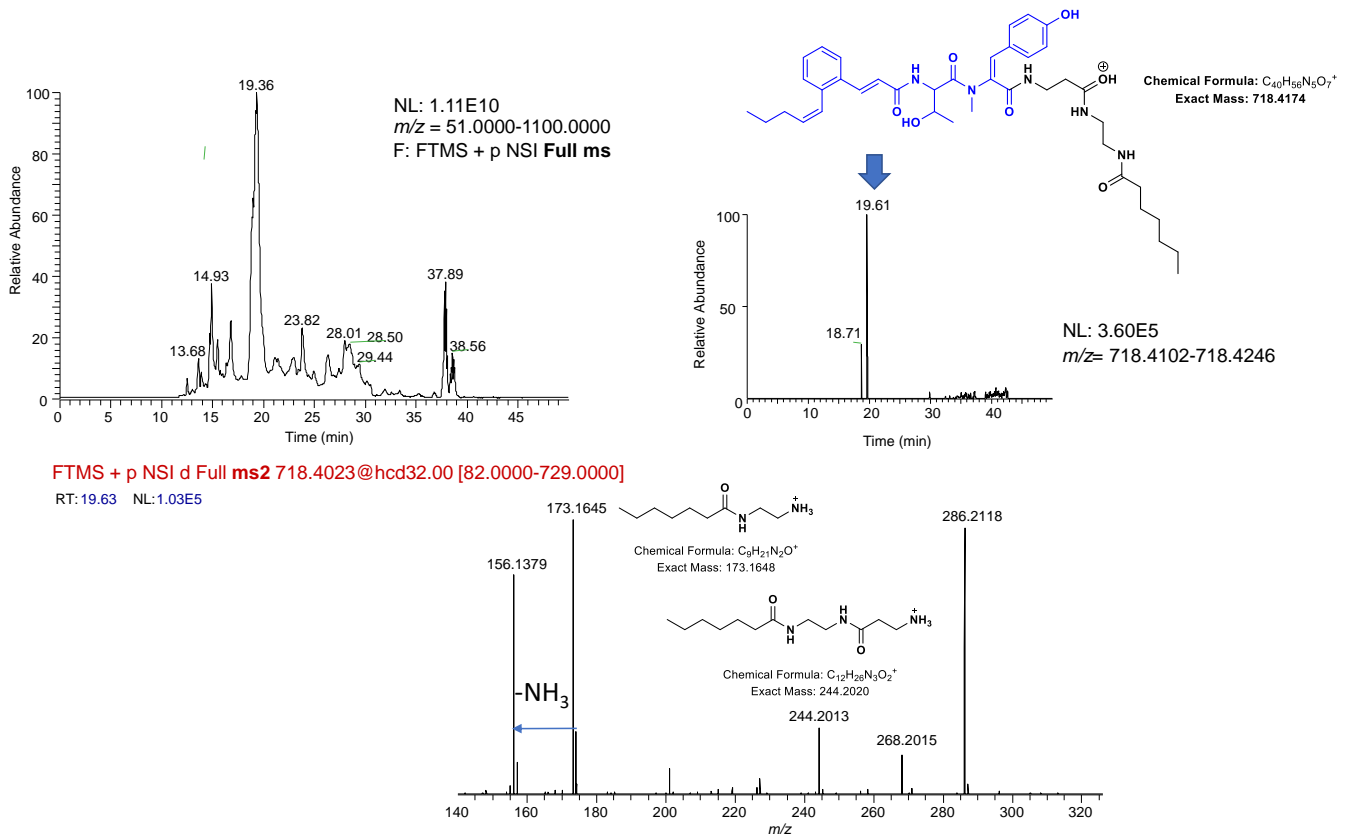

From top left, clockwise: TIC, EIC and HR-MS<sup>2</sup> fragments of *m/z* 718 tripeptide from extract analysis.

### Tetrapeptide

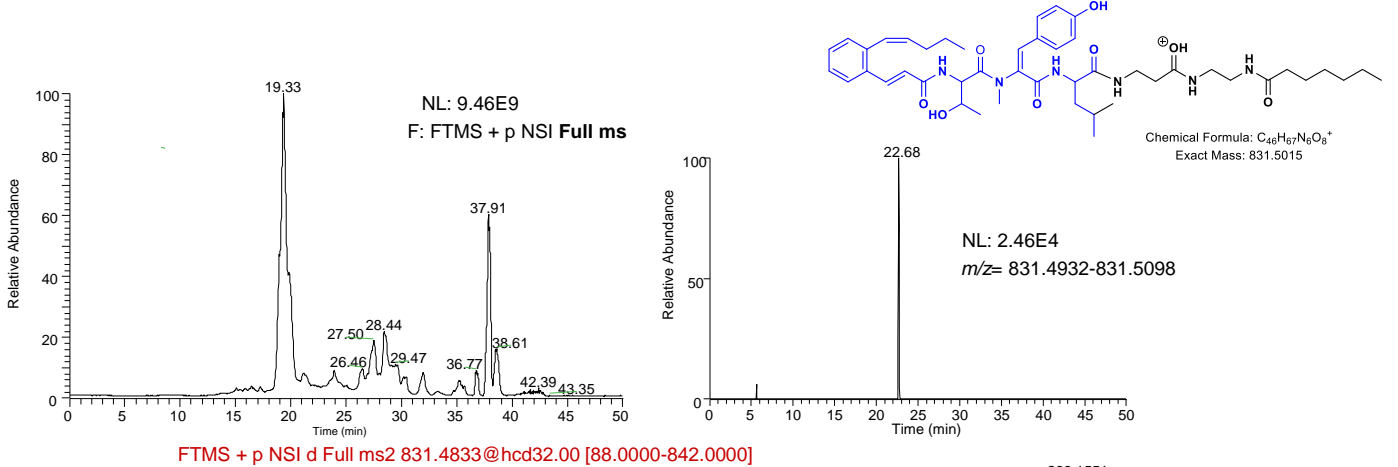

FTMS + p NSI d Full ms2 831.4833@hcd32.00 [88.0000-842.0000]

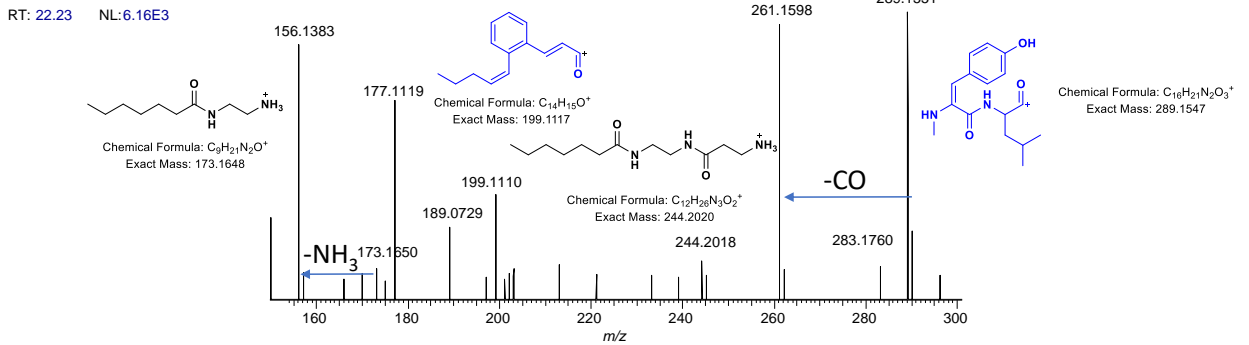

From top left, clockwise: TIC, EIC and HR-MS<sup>2</sup> fragments of *m/z* 831 tetrapeptide from extract analysis.

### Hexapeptide

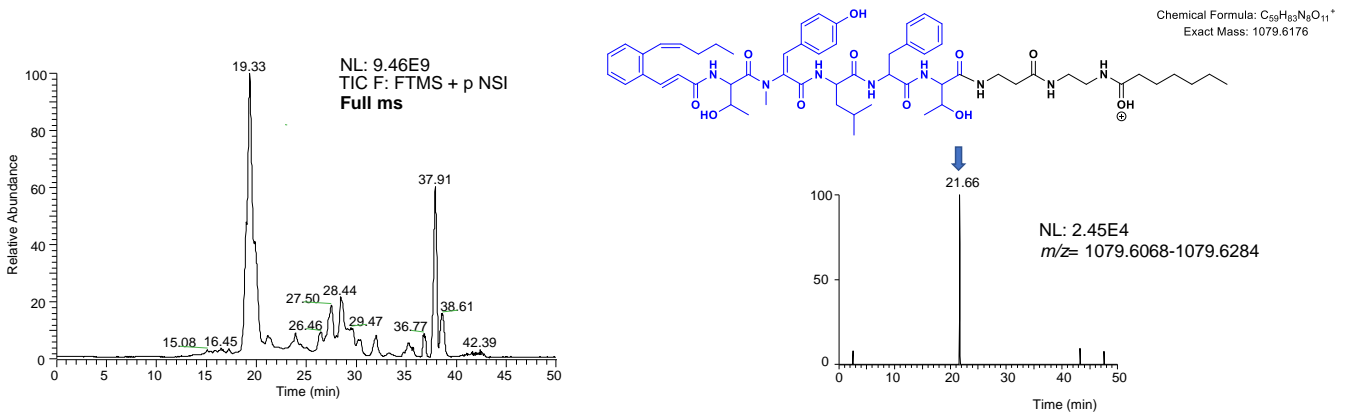

FTMS + p NSI d Full ms2 1079.6031@hcd32.00 [103.0000-1090.0000]

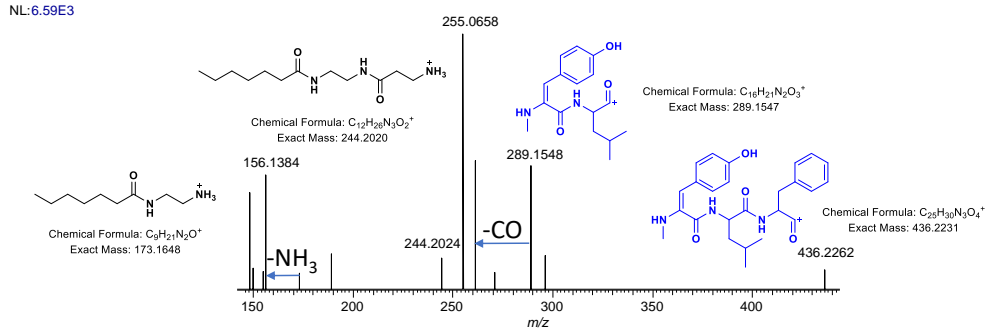

From top left, clockwise: TIC, EIC and HR-MS<sup>2</sup> fragments of *m/z* 1079 pentapeptide from extract analysis.

**Figure S29. Putative peptide intermediate species captured in the biosynthesis of WS9326A by a glycine-based chain termination probe.**

**Dipeptide**

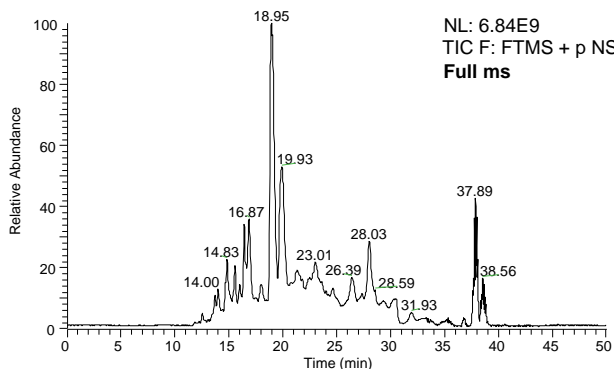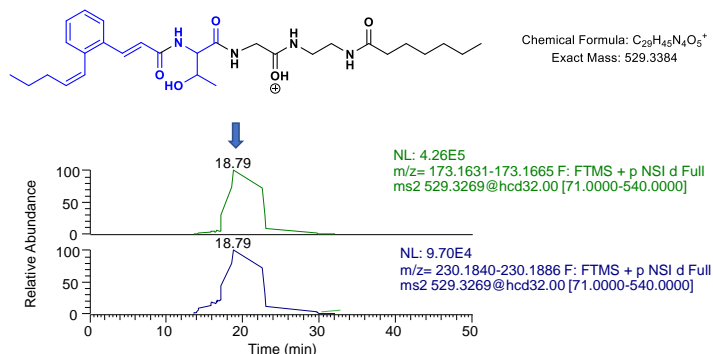

FTMS + p NSI d Full ms2 529.3269@hcd32.00 [71.0000-540.0000]  
RT: 18.56-18.79 NL: 4.88E5

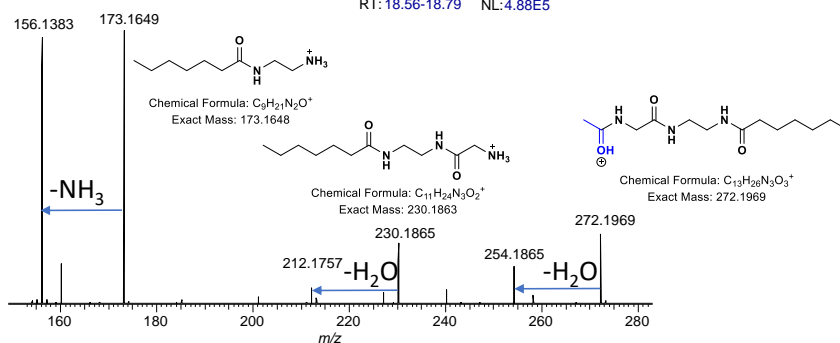

From top left, clockwise: TIC, HR-MS<sup>2</sup> detection and fragments of *m/z* 529 dipeptide from extract analysis.

**Tripeptide**

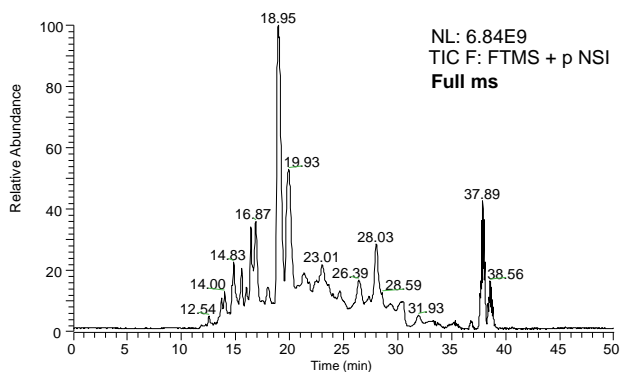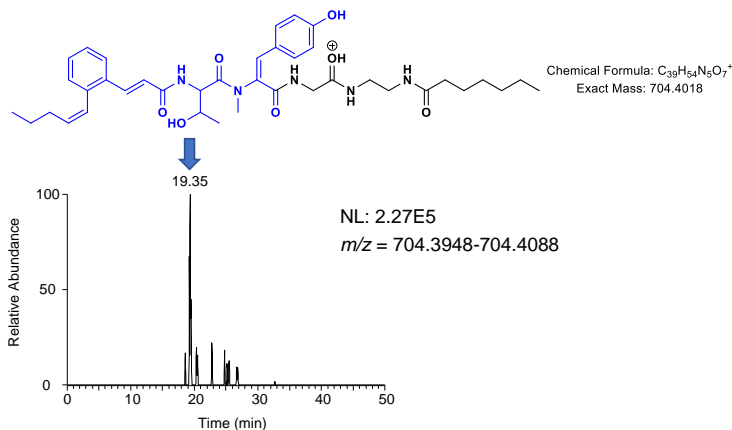

FTMS + p NSI d Full ms2 704.3920@hcd32.00 [81.0000-715.0000]  
NL: 1.01E5

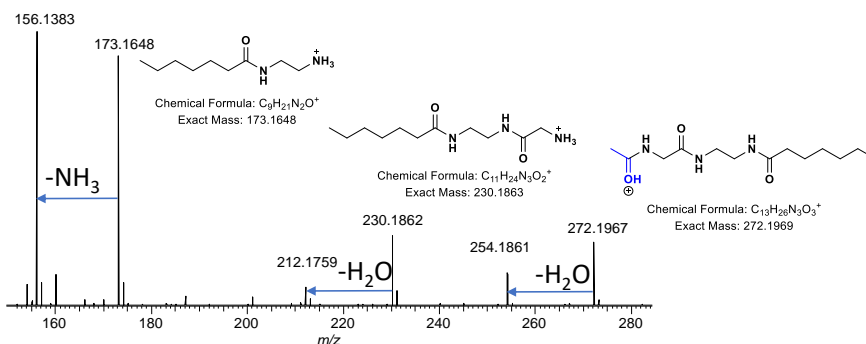

From top left, clockwise: TIC, EIC and HR-MS<sup>2</sup> fragments of *m/z* 704 tripeptide from extract analysis.

## Tetrapeptide

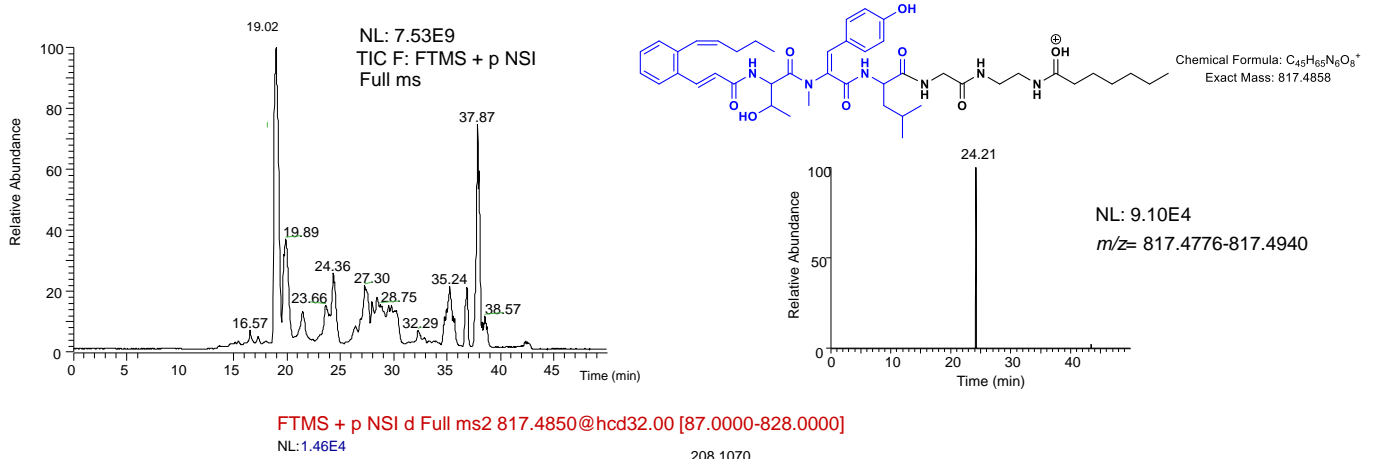

From top left, clockwise: TIC, EIC and HR-MS<sup>2</sup> fragments of  $m/z$  817 tetrapeptide from extract analysis.

## Hexapeptide

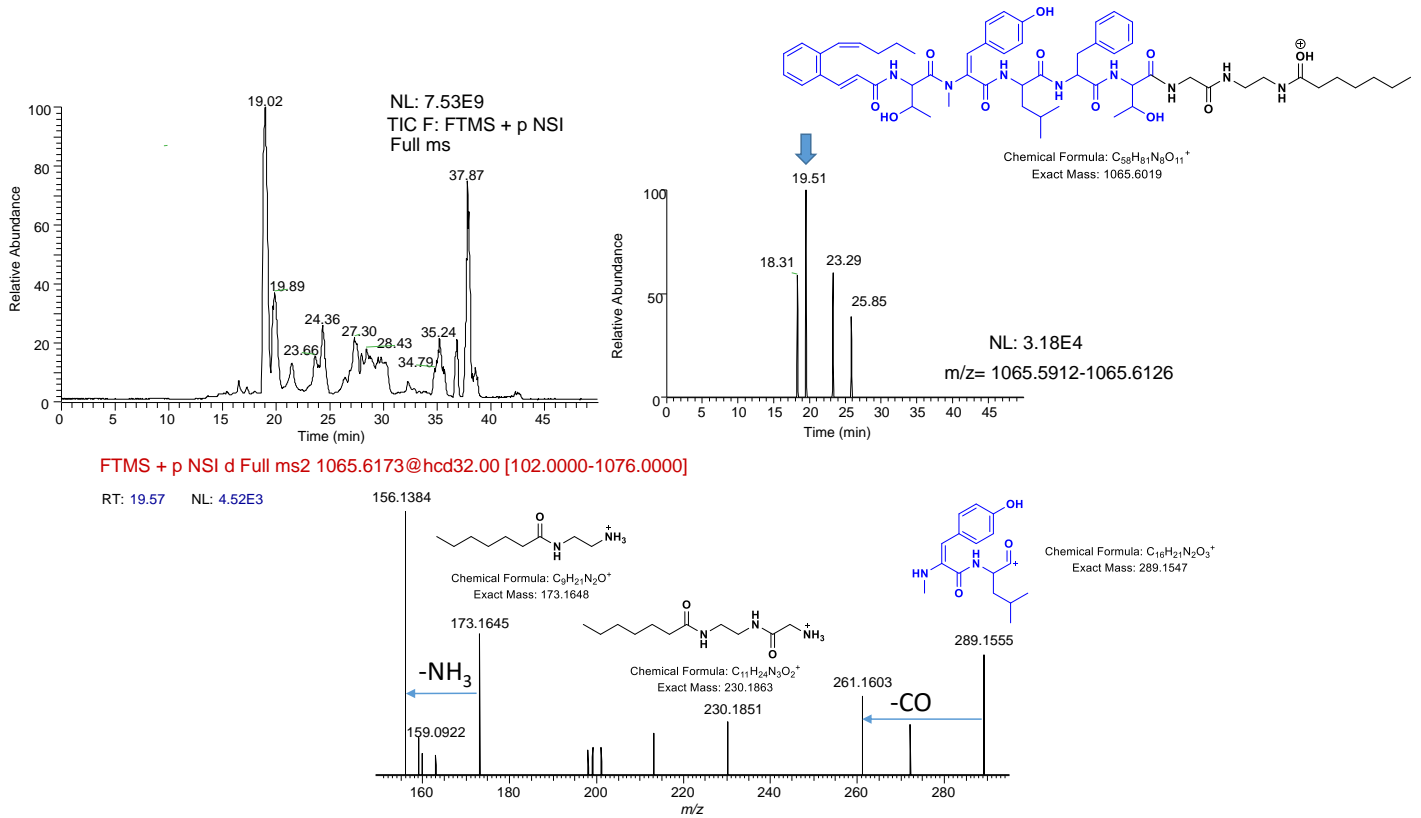

From top left, clockwise: TIC, EIC and HR-MS<sup>2</sup> fragments of  $m/z$  1065 hexapeptide from extract analysis.

**Figure S30. Putative peptide intermediate species captured in the biosynthesis of WS9326A by a chain termination probe in which the Tyr-residue has not been dehydrated.** These include  $m/z$  720, 1072 and 1081 (species for which tyrosine has not been dehydrated, intermediates in the formation of WS9326B) partial spectra and putative structures are shown.

**$m/z$  720:**

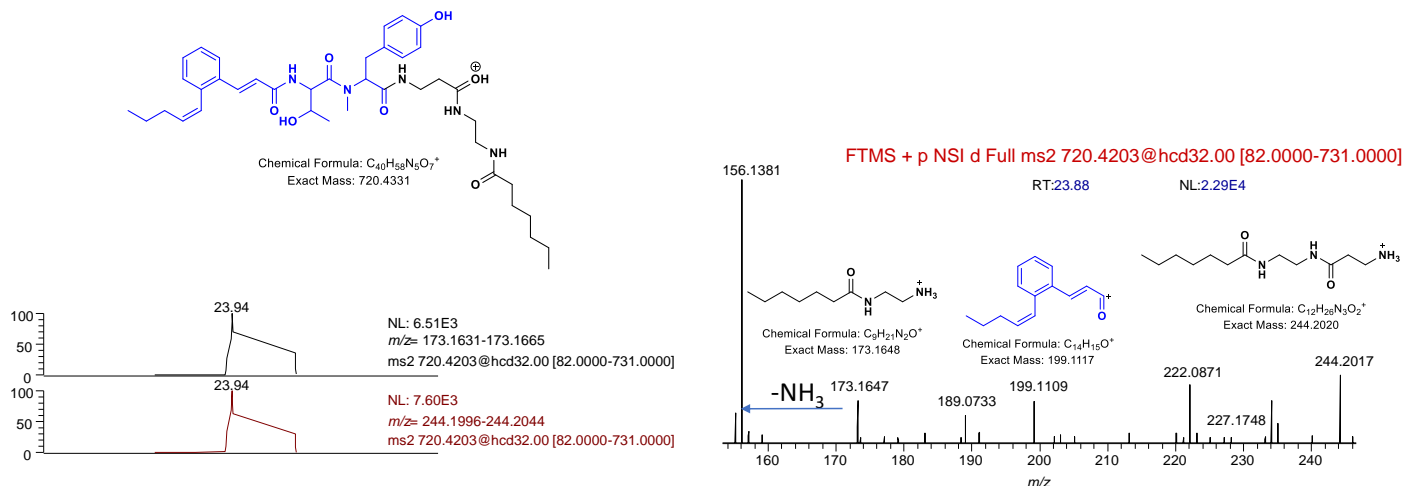

**$m/z$  1072:**

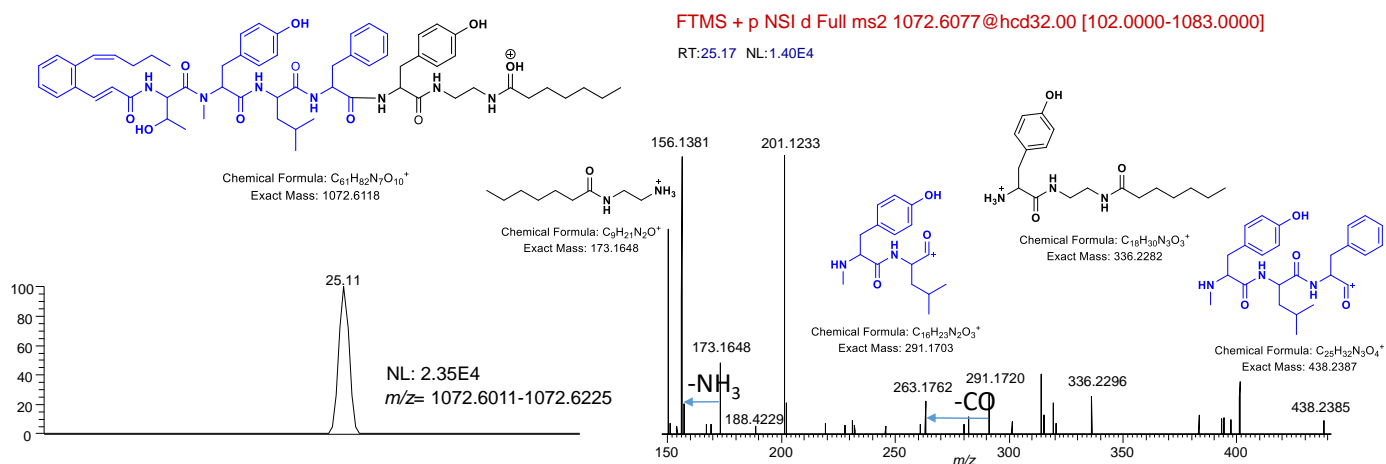

**$m/z$  1081:**

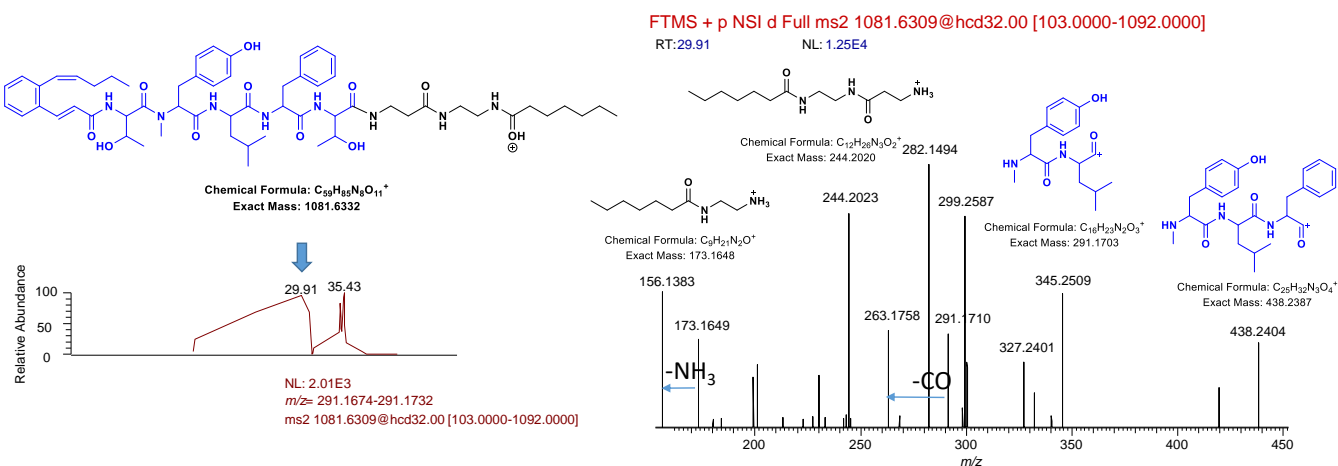



**Figure S31. The genome region comparison of P450<sub>Sas</sub> to homologous P450 enzymes.** Comparison of selected genes from the biosynthetic clusters that encode P450<sub>Sas</sub> homologues (UniProt ID left-hand side) including the P450 (yellow), NRPS (red, Sas17 homologue in dark red), transporter (blue) and enzymes responsible for the biosynthesis of the Z-pentenylcinnamoyl moiety (green), showing the similarity of the biosynthetic clusters containing P450<sub>Sas</sub> homologues. An analysis of the Sas17 NRPS homologues is shown on the right-hand side of the figure, showing two modules (Thr, N-Me-Tyr) with conserved C-A-PCP-C-A-NMt-PCP architecture. Such high levels of biosynthetic similarity support the hypothesis that all Sas16 homologues here will generate a Dht residue in the same acylated dipeptide biosynthetic intermediate.

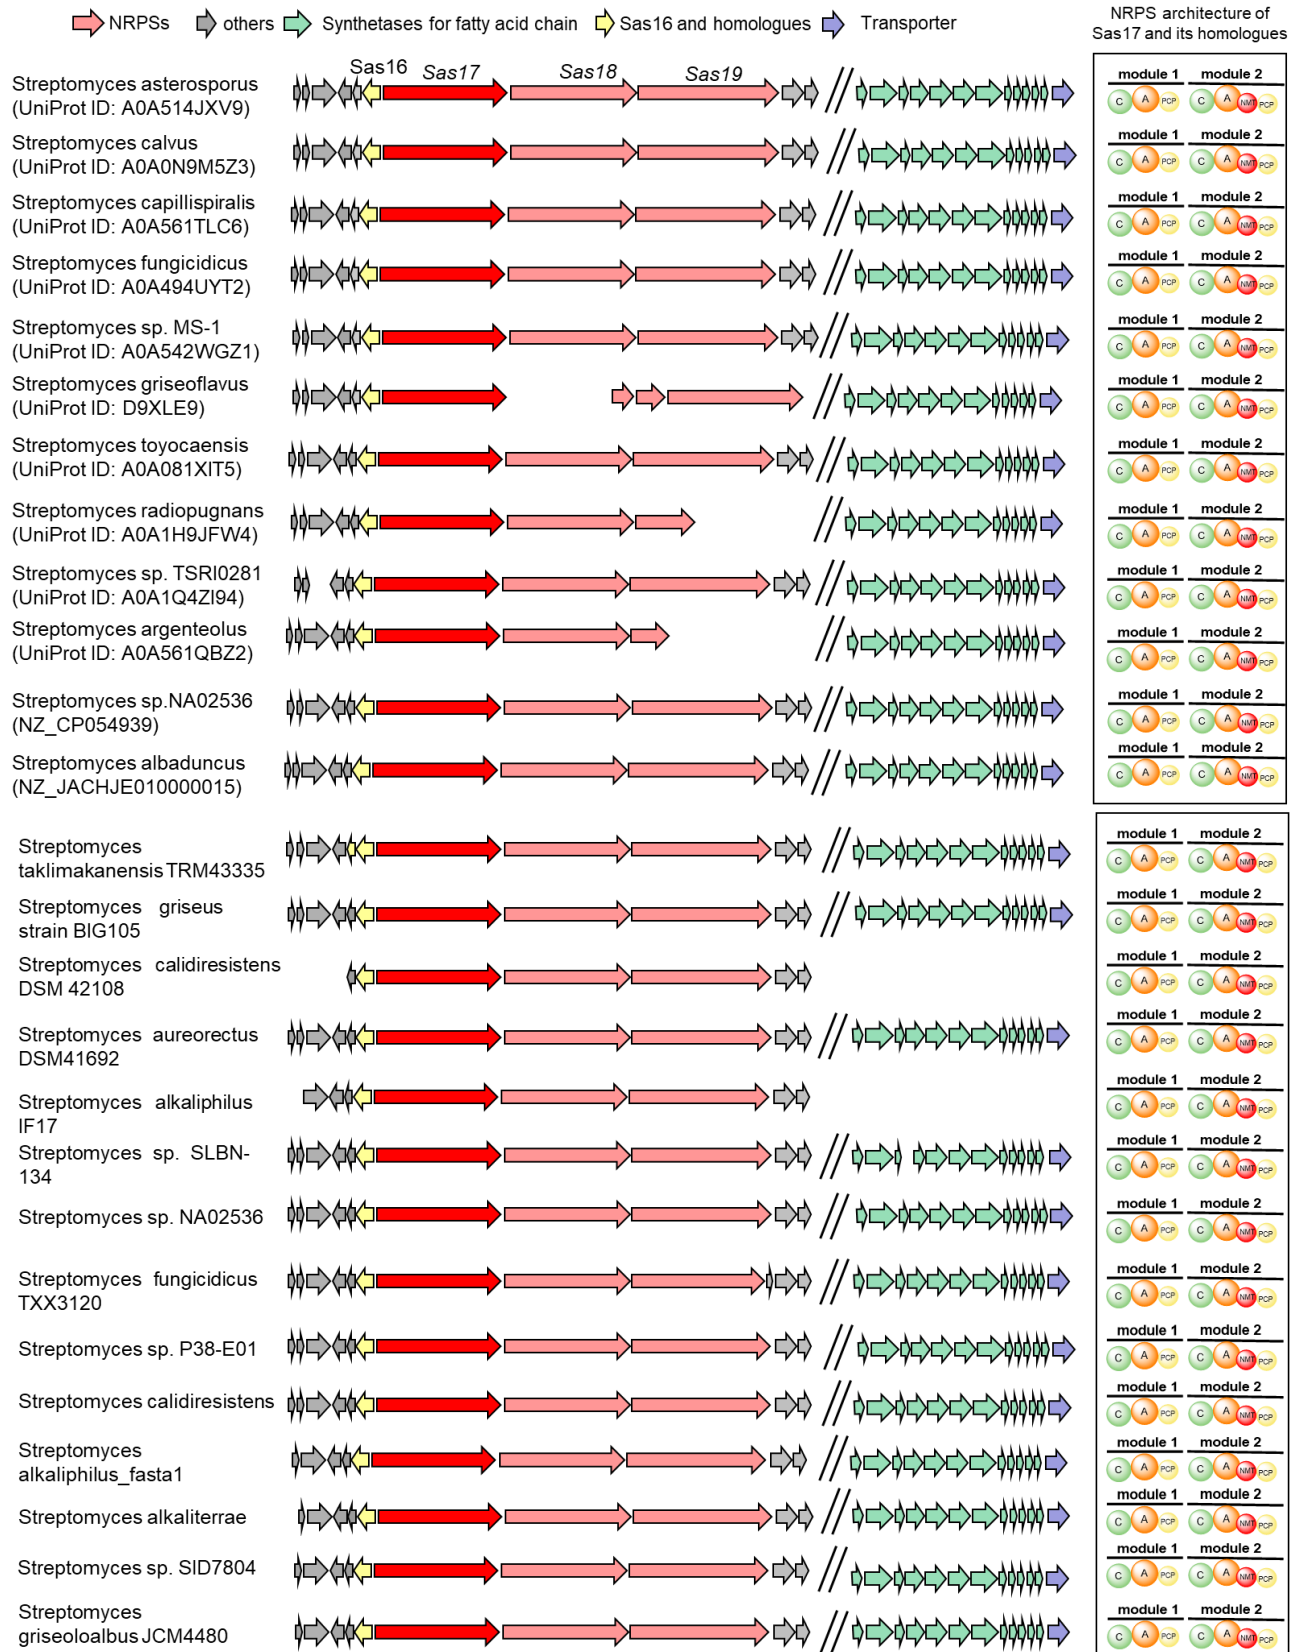



Figure S34.  $^1\text{H}$ - $^1\text{H}$  COSY spectrum of WS9326M in DMSO- $d_6$ .

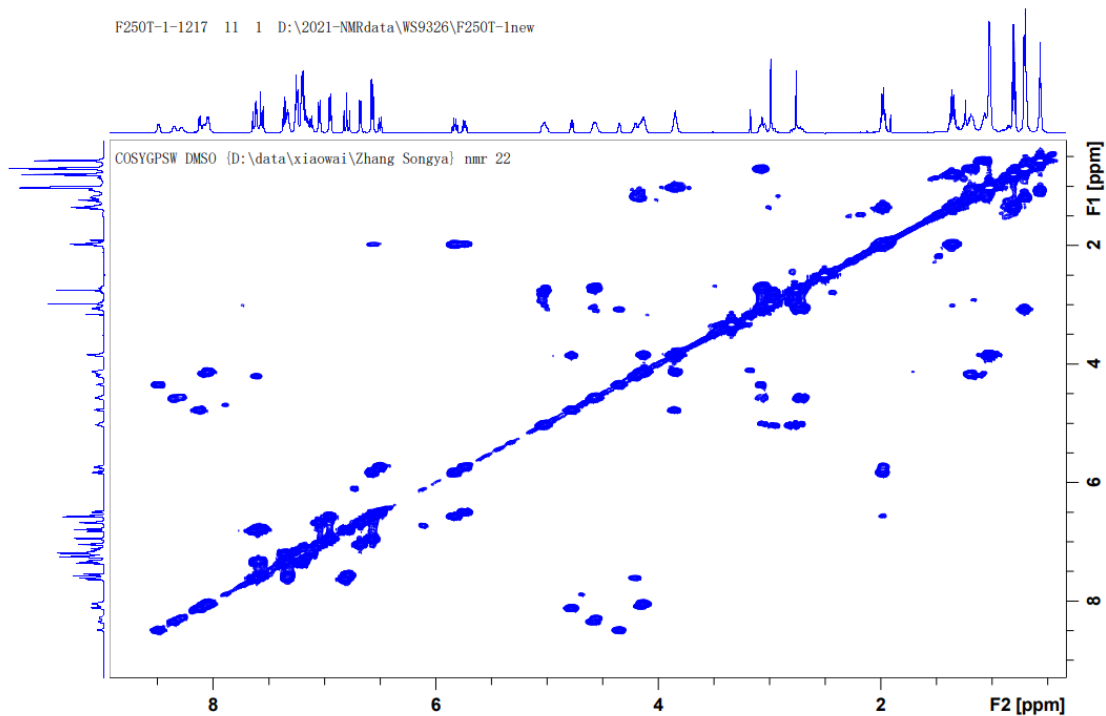

Figure S35. HSQC spectrum of WS9326M in DMSO- $d_6$ .

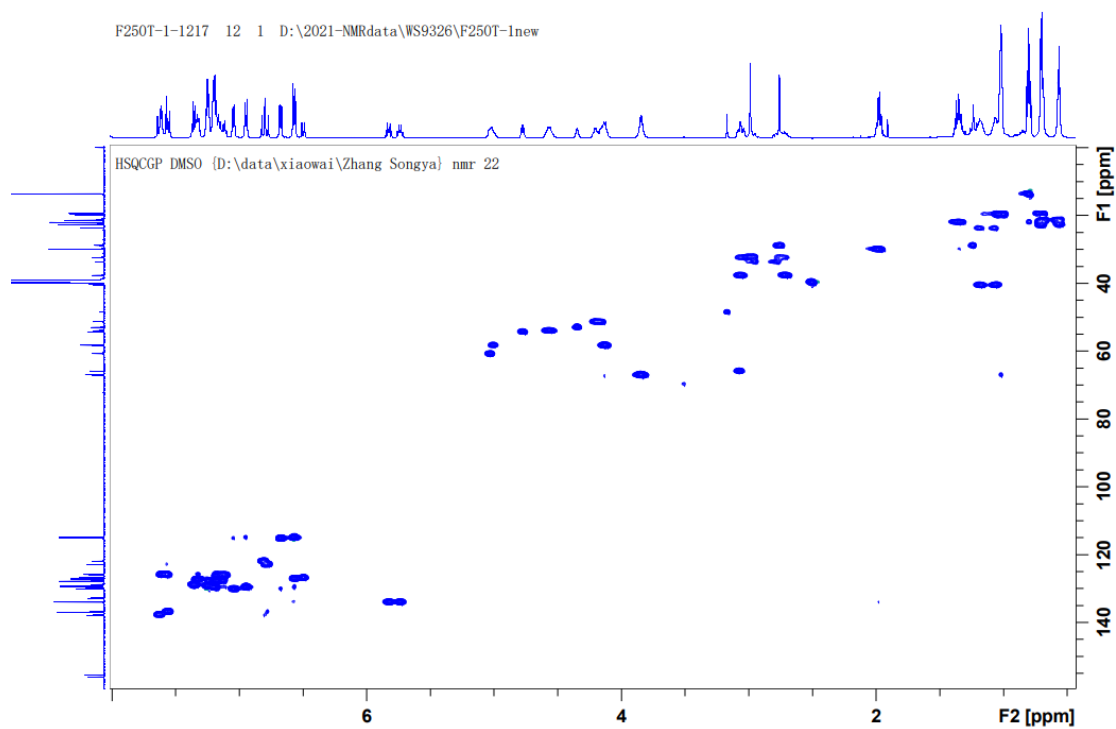

Figure S36. HMBC spectrum of WS9326M in DMSO-d<sub>6</sub>.

F250T-1-1217 13 1 D:\2021-NMRdata\WS9326\F250T-1new

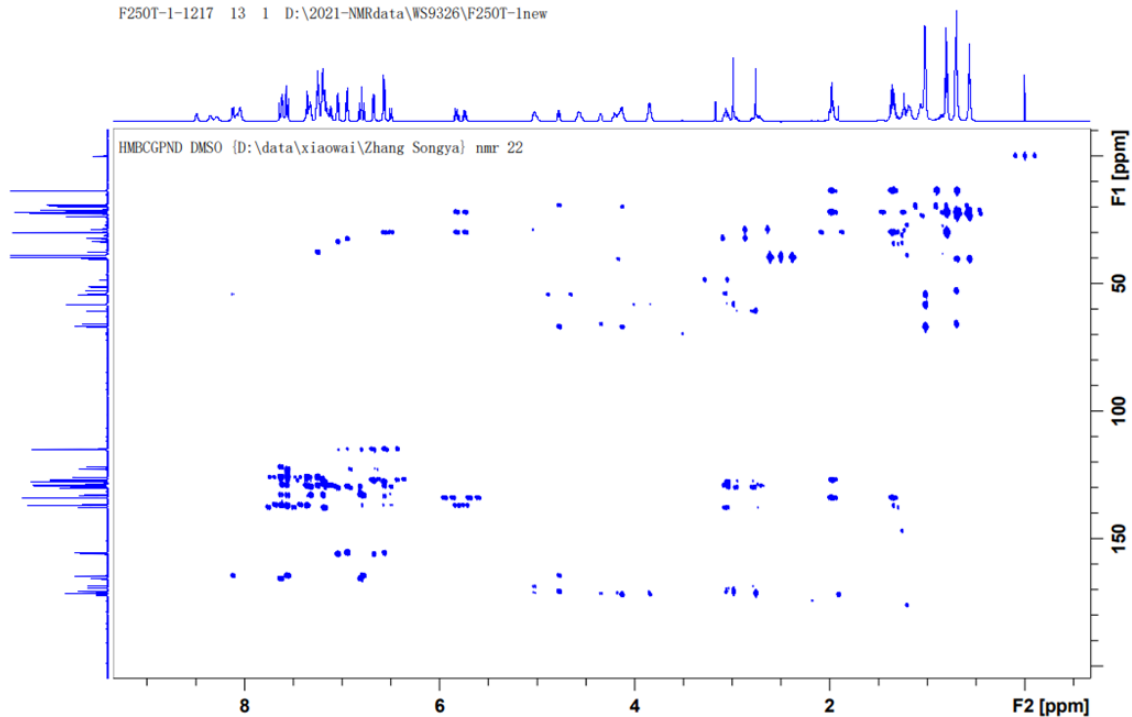

Figure S37. <sup>1</sup>H NMR spectrum of WS9326N in DMSO-d<sub>6</sub>.

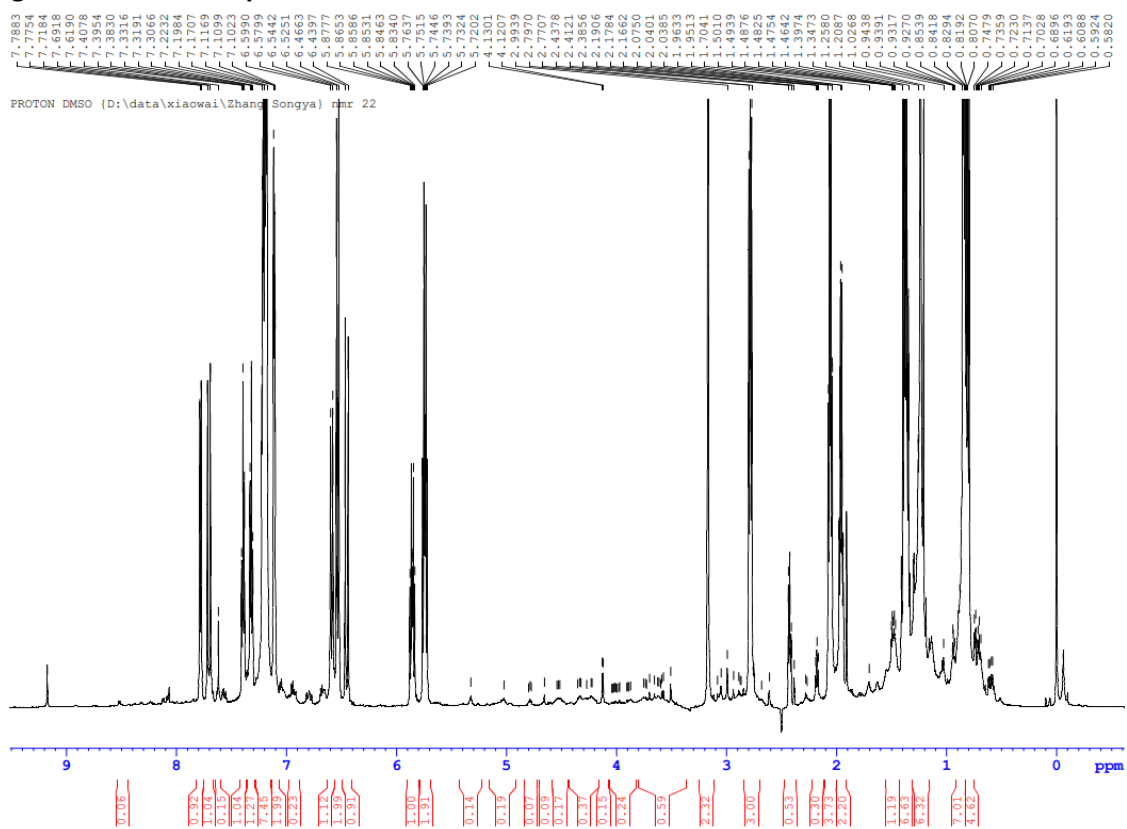

Figure S38.  $^{13}\text{C}$  NMR spectrum of WS9326N in  $\text{DMSO-d}_6$ .

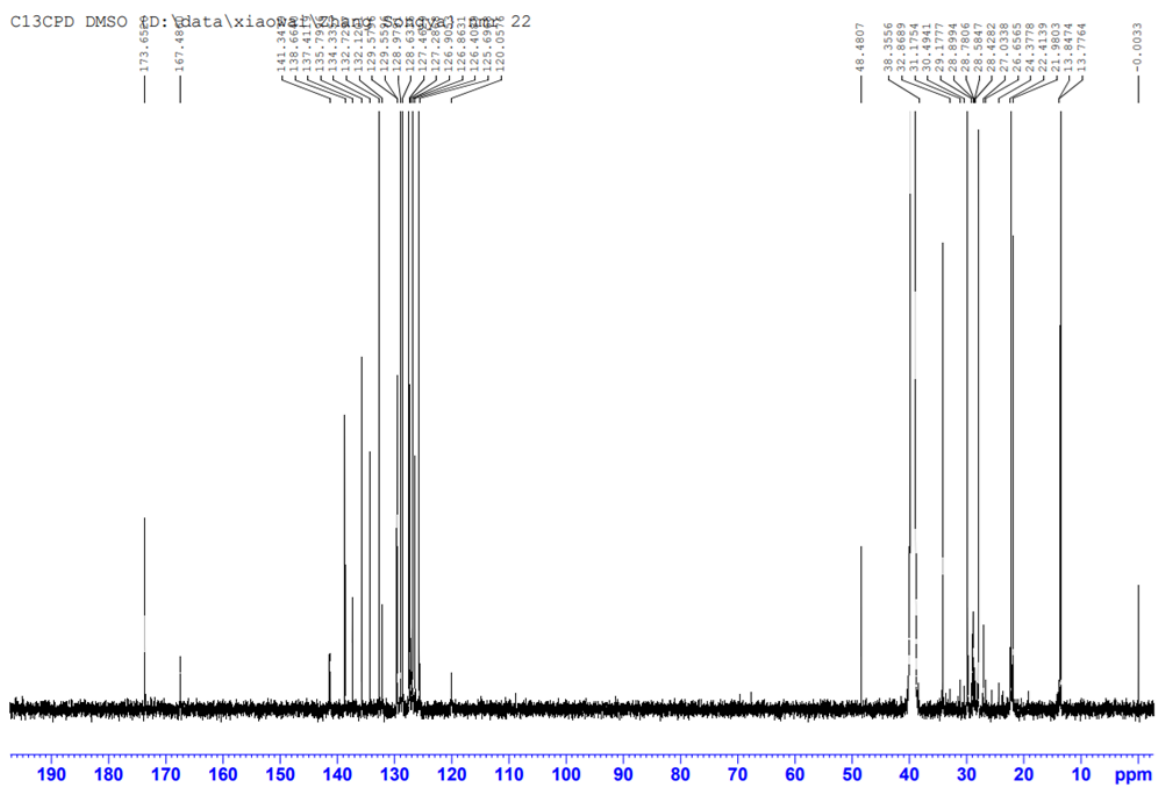

Figure S39.  $^1\text{H}$ - $^1\text{H}$  COSY spectrum of WS9326N in  $\text{DMSO-d}_6$ .

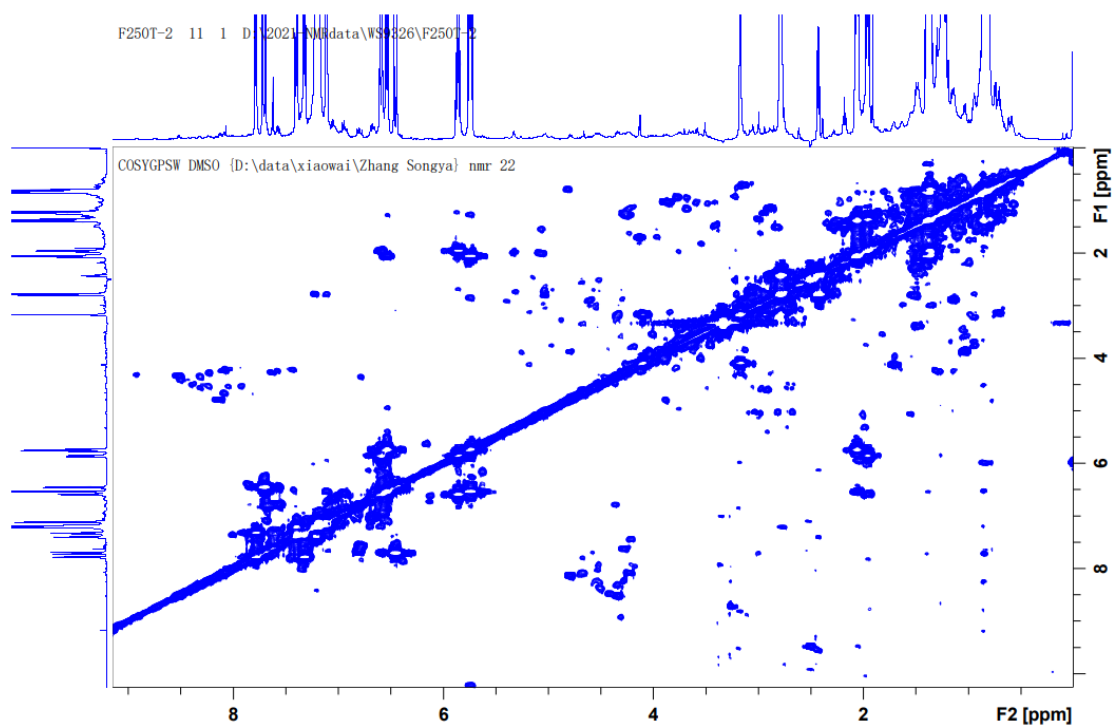

Figure S40. HSQC spectrum of WS9326N in  $\text{DMSO-d}_6$ .

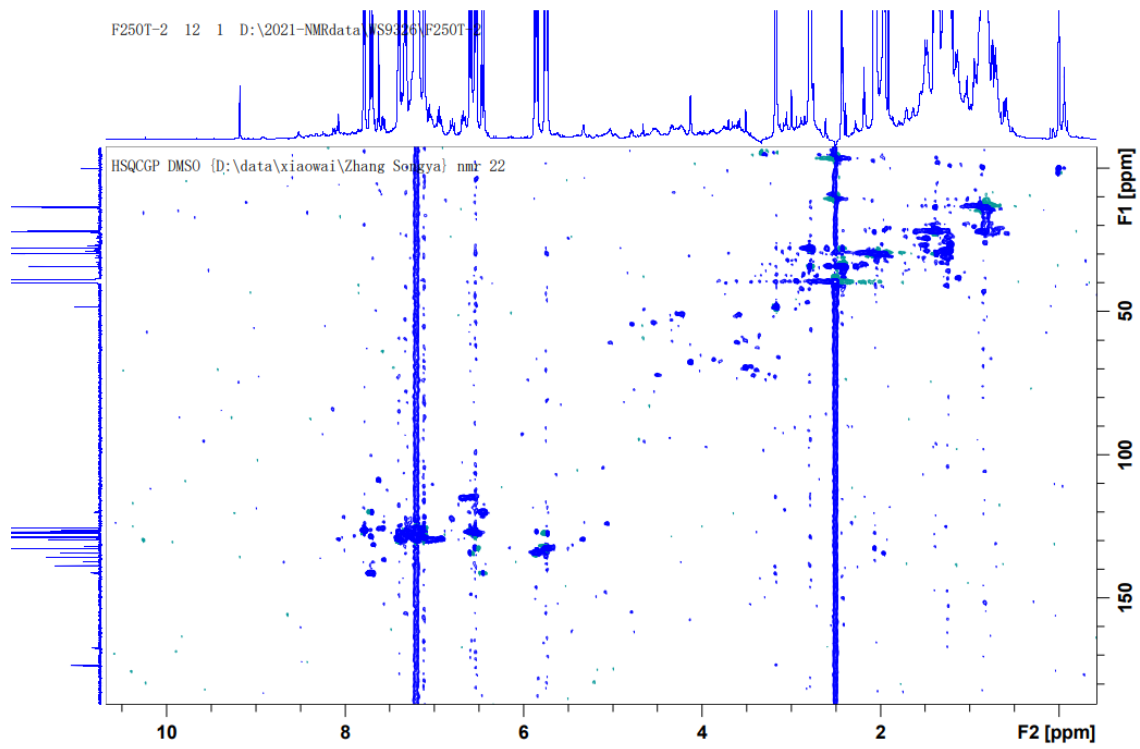

Figure S41. HMBC spectrum of WS9326N in DMSO-d<sub>6</sub>.

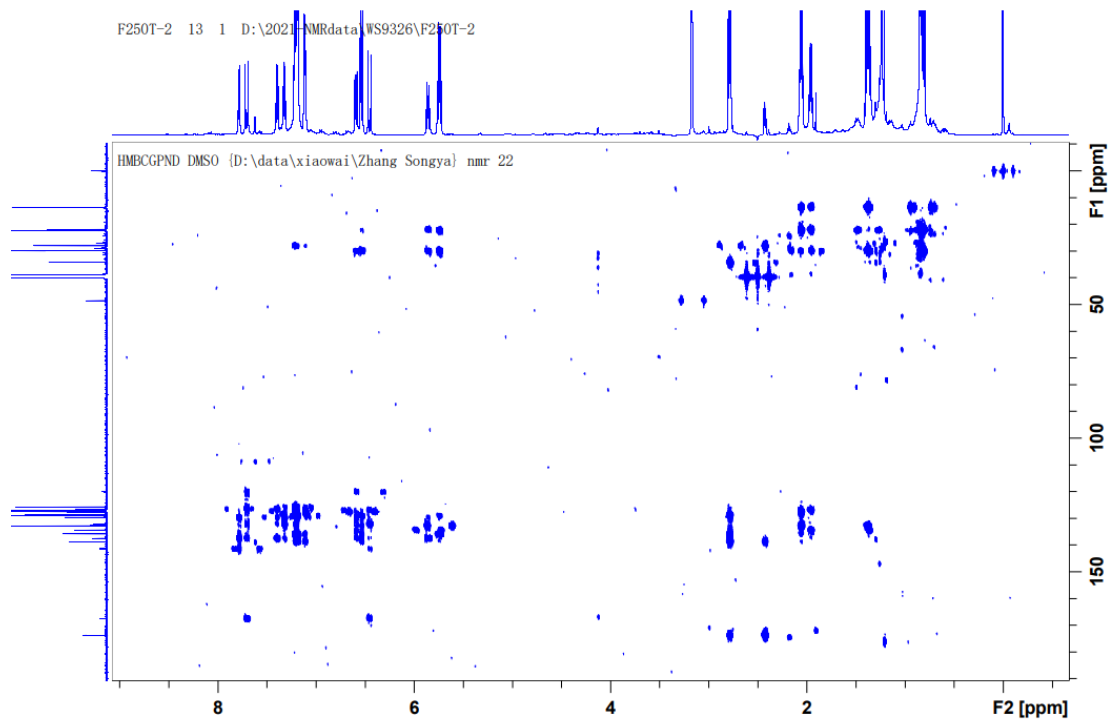

Figure S42.  $^1\text{H}$  NMR spectrum of WS9326X in  $\text{DMSO-d}_6$ .

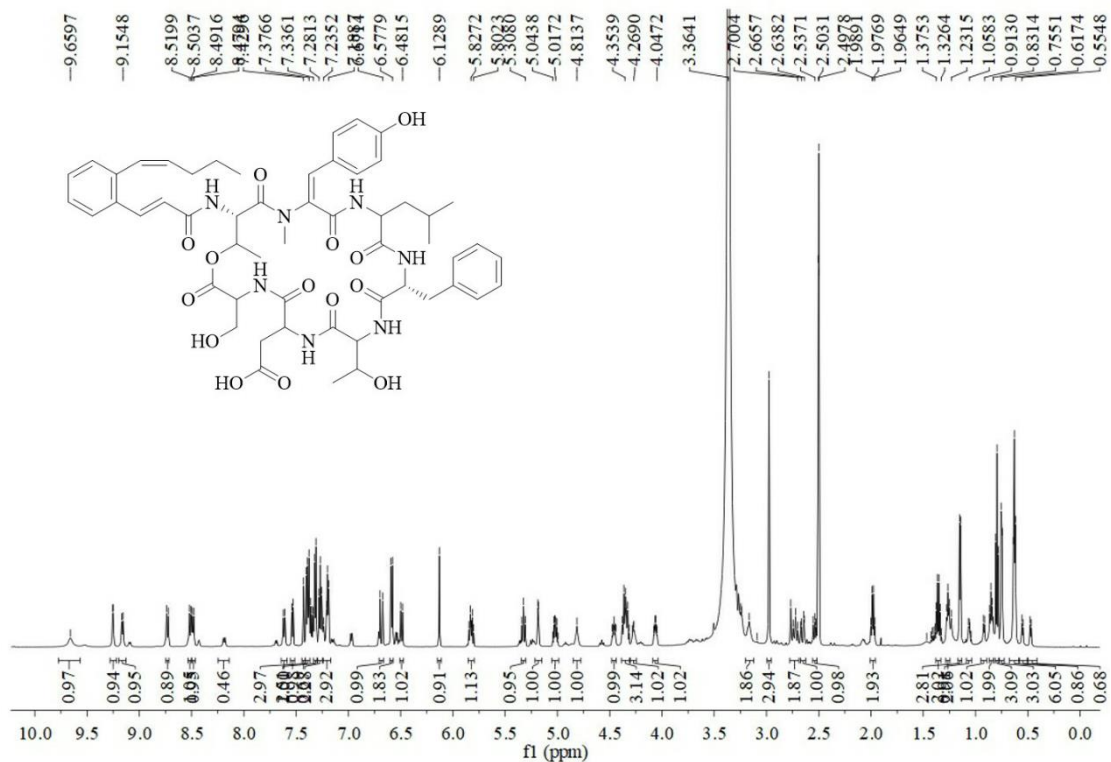

Figure S43.  $^{13}\text{C}$  NMR spectrum of WS9326X in  $\text{DMSO-d}_6$ .

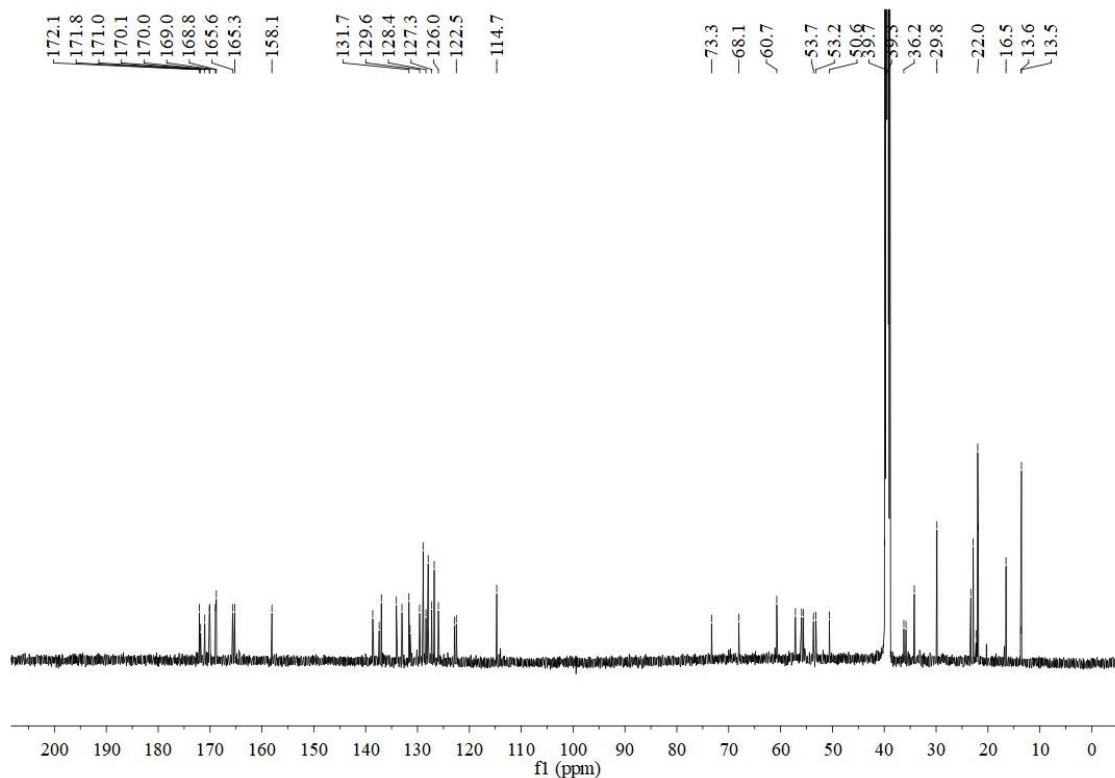

Figure S44.  $^1\text{H}$ - $^1\text{H}$  COSY spectrum of WS9326X in  $\text{DMSO-}d_6$ .

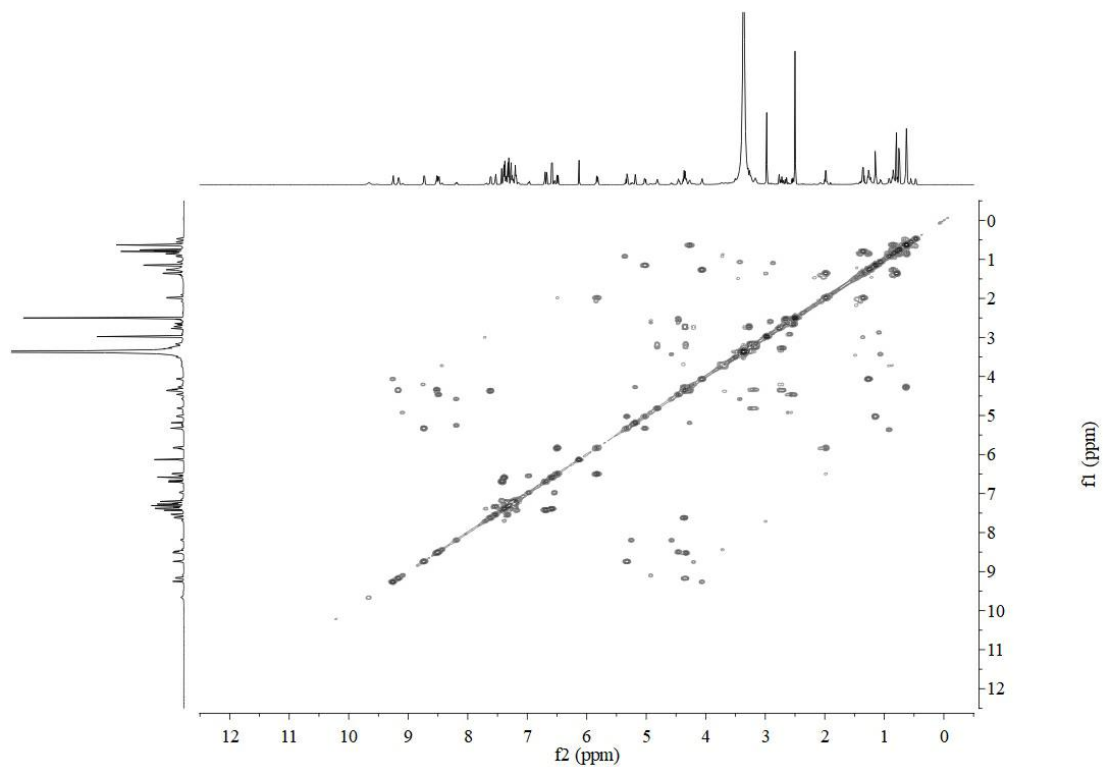

Figure S45. HSQC spectrum of WS9326X in  $\text{DMSO-}d_6$ .

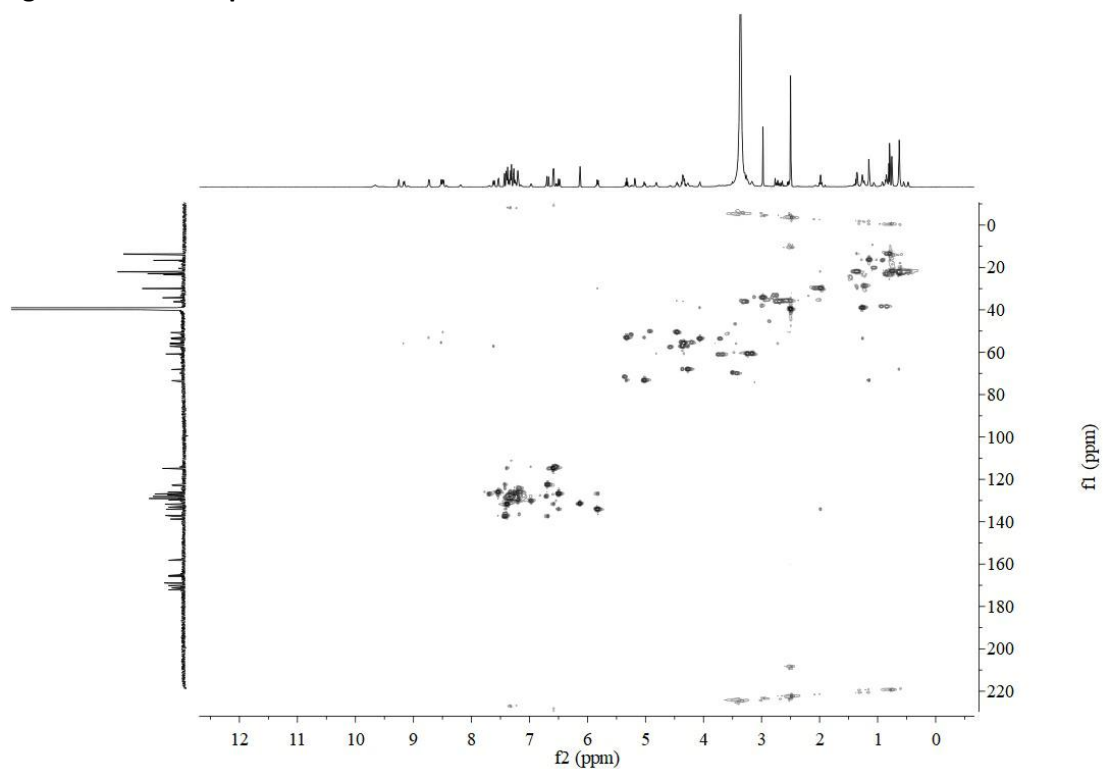



Figure S46. HMBC spectrum of WS9326X in DMSO- $d_6$ .

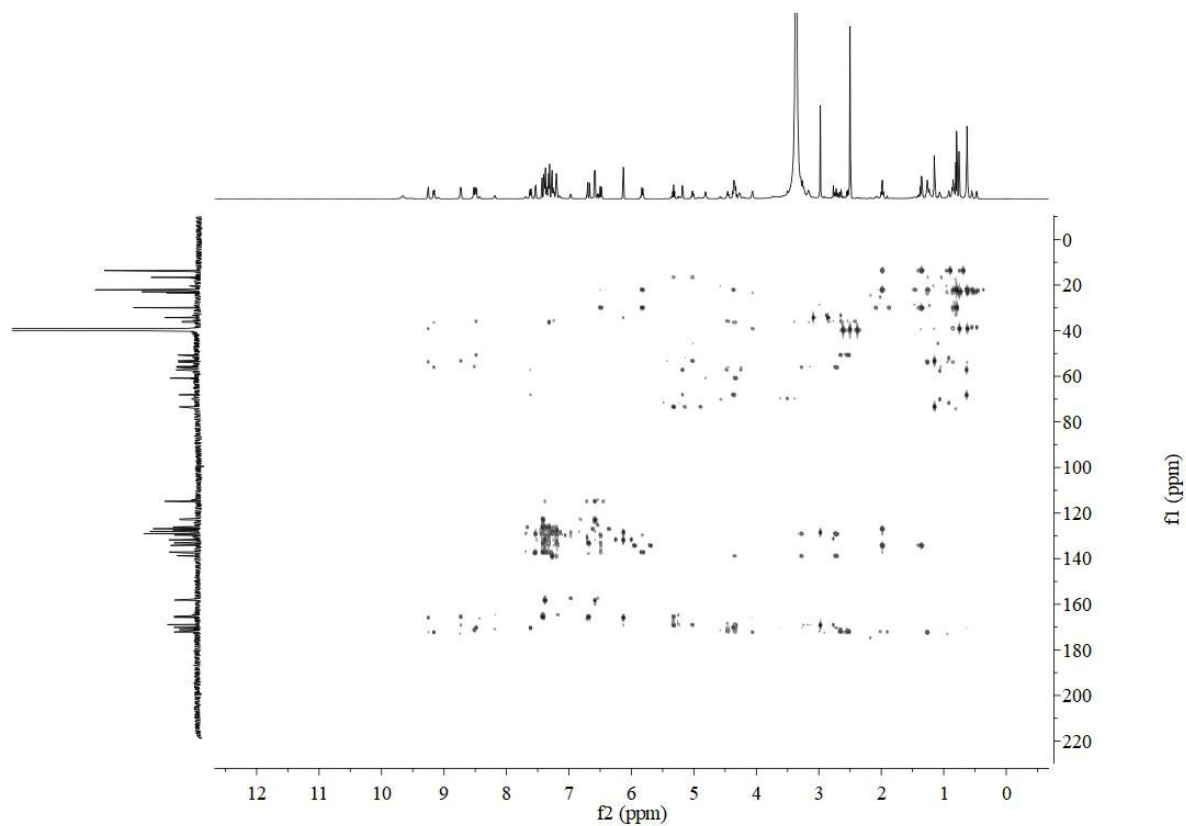

Figure S47. HPLC chromatogram of FDAA derivative of WS9326X and the corresponding standard amino acids. The eluent for each chromatogram was monitored by extracted ion chromatogram mode.

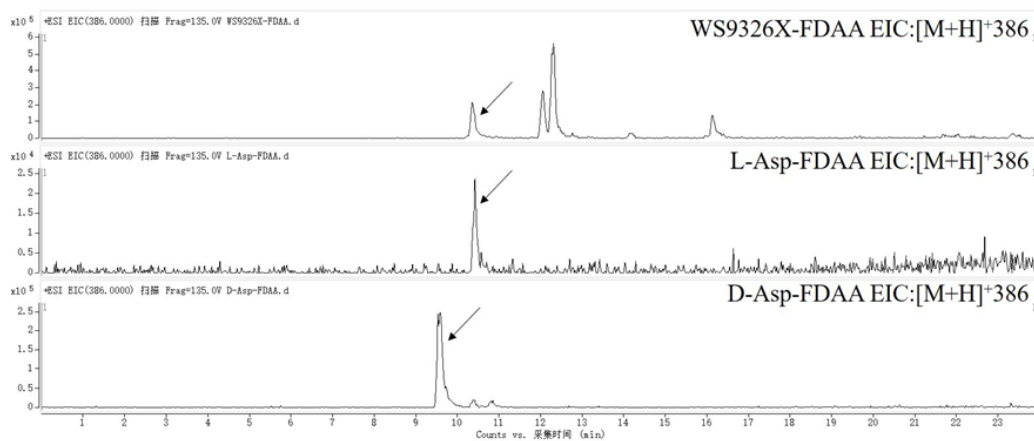

Figure S48. HPLC-MS/MS fragmentation analysis of WS9326X.

1036 #5479 RT: 16.88 AV: 1 NL: 1.68E6  
F: FTMS + c ESI d Full ms2 1038.4819@hcd40.00 [72.0000-1080.0000]

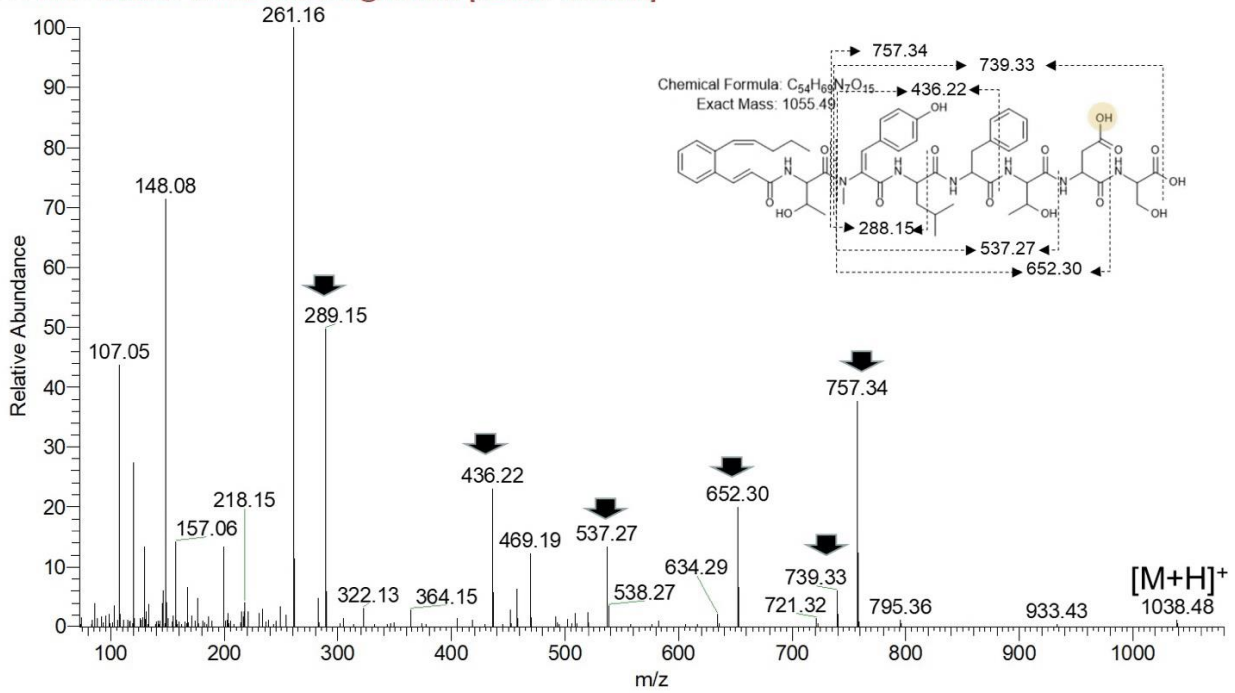

Figure S49. The HR LCMS chromatogram of WS9326X.

2lividans13261F16sg5d #7560-7812 RT: 13.83-14.26 AV: 43 NL: 1.51E8  
T: FTMS - p ESI Full ms [800.0000-1500.0000]

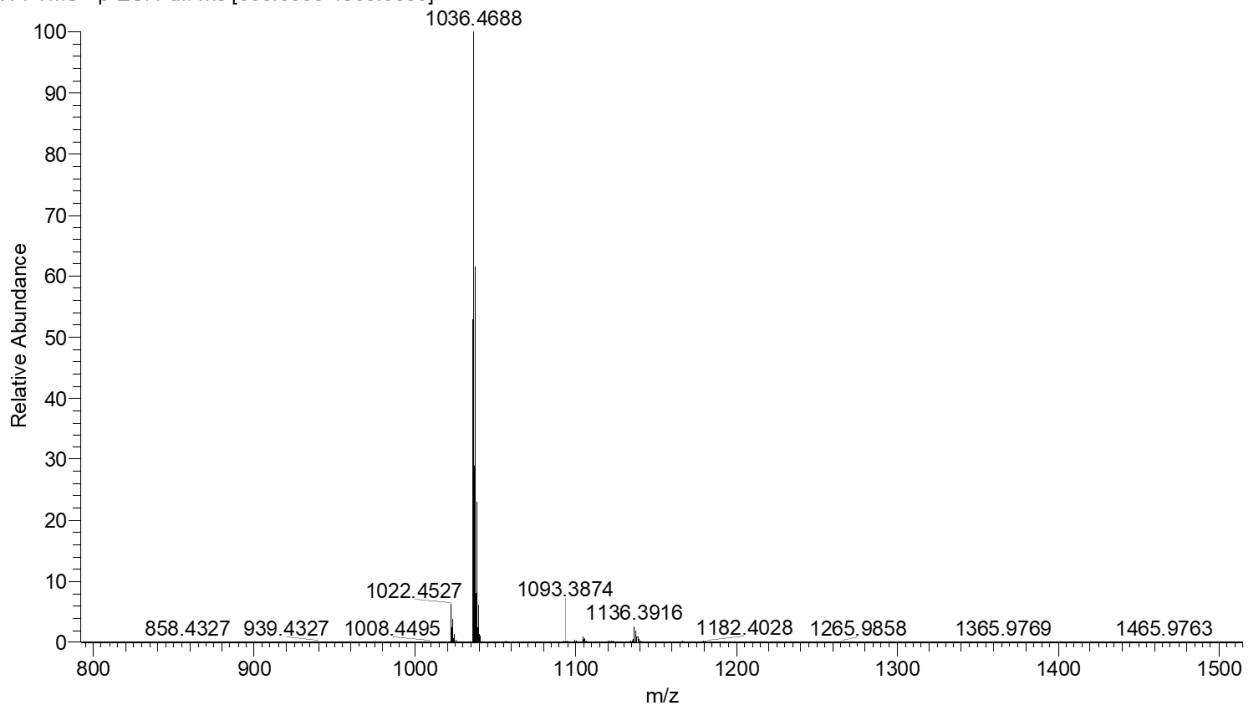

### 3. SI References

- [1] B. Gust, G. L. Challis, K. Fowler, T. Kieser, K. F. Chater, *Proceedings of the National Academy of Sciences* **2003**, *100*, 1541-1546.
- [2] M. Bierman, R. Logan, K. O'Brien, E. T. Seno, R. N. Rao, B. E. Schoner, *Gene* **1992**, *116*, 43-49.
- [3] D. A. Hopwood, M. J. Bibb, K. F. Chater, T. Kieser, C. J. Bruton, H. M. Kieser, D. J. Lydiate, C. P. Smith, J. M. Ward, H. and Schrempf, *Genetic manipulation of streptomyces: A laboratory manual.*, The John Innes Foundation., Norwich, **1985**.
- [4] S. Herrmann, T. Siegl, M. Luzhetska, L. Petzke, C. Jilg, E. Welle, A. Erb, P. F. Leadlay, A. Bechthold, A. Luzhetsky, *Appl Environ Microb* **2012**, *78*, 1804-1812.
- [5] R. Makitrynsky, B. Ostash, O. Tsyplik, Y. Rebets, E. Doud, T. Meredith, A. Luzhetsky, A. Bechthold, S. Walker, V. Fedorenko, *Open biology* **2013**, *3*, 130121.
- [6] L. Kalan, A. Gessner, M. N. Thaker, N. Waglechner, X. Zhu, A. Szawiola, A. Bechthold, G. D. Wright, D. L. Zechel, *Chemistry & Biology* **2013**, *20*, 1214-1224.
- [7] S. G. Bell, F. Xu, E. O. D. Johnson, I. M. Forward, M. Bartlam, Z. Rao, L.-L. Wong, *J Biol Inorg Chem* **2010**, *15*, 315-328.
- [8] M. Sunbul, N. J. Marshall, Y. Zou, K. Zhang, J. Yin, *J Mol Biol* **2009**, *387*, 883-898.
- [9] J. Bogomolovas, B. Simon, M. Sattler, G. Stier, *Protein Expr Purif* **2009**, *64*, 16-23.
- [10] H. Wang, X. Bian, L. Xia, X. Ding, R. Müller, Y. Zhang, J. Fu, A. F. Stewart, *Nucleic Acids Research* **2013**, *42*, e37-e37.
- [11] S. Zhang, J. Zhu, D. Zechel, C. Jessen-Trefzer, R. Eastman, T. Paululat, A. Bechthold, *Chembiochem* **2018**, *19*, 272-279.
- [12] L. Holm, P. Rosenström, *Nucleic Acids Res* **2010**, *38*, W545-W549.
- [13] A. Miyanaga, R. Takayanagi, T. Furuya, A. Kawamata, T. Itagaki, Y. Iwabuchi, N. Kanoh, F. Kudo, T. Eguchi, *ChemBioChem* **2017**, *18*, 2179-2187.
- [14] Y. Yasutake, N. Imoto, Y. Fujii, T. Fujii, A. Arisawa, T. Tamura, *Biochemical and Biophysical Research Communications* **2007**, *361*, 876-882.
- [15] L.-H. Xu, S. Fushinobu, S. Takamatsu, T. Wakagi, H. Ikeda, H. Shoun, *Journal of Biological Chemistry* **2010**, *285*, 16844-16853.
- [16] M. D. DeMars, F. Sheng, S. R. Park, A. N. Lowell, L. M. Podust, D. H. Sherman, *ACS Chemical Biology* **2016**, *11*, 2642-2654.
- [17] K. Yasuda, Y. Yogo, H. Sugimoto, H. Mano, T. Takita, M. Ohta, M. Kamakura, S. Ikushiro, K. Yasukawa, Y. Shiro, T. Sakaki, *Biochemical and Biophysical Research Communications* **2017**, *486*, 336-341.
- [18] S. Li, M. R. Chaulagain, A. R. Knauff, L. M. Podust, J. Montgomery, D. H. Sherman, *Proceedings of the National Academy of Sciences* **2009**, *106*, 18463-18468.
- [19] O. Pylypenko, F. Vitali, K. Zerbe, J. A. Robinson, I. Schlichting, *J Biol Chem* **2003**, *278*, 46727-46733.
- [20] J. R. Cupp-Vickery, T. L. Poulos, *Nature Structural Biology* **1995**, *2*, 144-153.
- [21] M. J. Cryle, A. Meinhart, I. Schlichting, *J Biol Chem* **2010**, *285*, 24562-24574.
- [22] K. Haslinger, C. Brieke, S. Uhlmann, L. Sieverling, R. D. Süßmuth, M. J. Cryle, *Angew Chem Int Ed* **2014**, *53*, 1-6.
- [23] K. Zerbe, O. Pylypenko, F. Vitali, W. Zhang, S. Rousset, M. Heck, J. W. Vrijbloed, D. Bischoff, B. Bister, R. D. Süßmuth, S. Pelzer, W. Wohlleben, J. A. Robinson, I. Schlichting, *Journal of Biological Chemistry* **2002**, *277*, 47476-47485.
- [24] J. Jumper, R. Evans, A. Pritzel, T. Green, M. Figurnov, O. Ronneberger, K. Tunyasuvunakool, R. Bates, A. Žídek, A. Potapenko, A. Bridgland, C. Meyer, S. A. A. Kohl, A. J. Ballard, A. Cowie, B. Romera-Paredes, S. Nikolov, R. Jain, J. Adler, T. Back, S. Petersen, D. Reiman, E. Clancy, M. Zielinski, M. Steinegger, M. Pacholska, T. Berghammer, S. Bodenstein, D. Silver, O. Vinyals, A. W. Senior, K. Kavukcuoglu, P. Kohli, D. Hassabis, *Nature* **2021**.
